# Supplementary material for: 4D-quantitative proteomics signature of asthenozoospermia and identification of extracellular matrix protein 1 as a novel biomarker for sperm motility
Source: Royal Society of Chemistry journal article supplement (doi:10.1039/d1mo00257k), 2021-11-24
Supplement: d1mo00257k1.xlsx [file d1mo00257k1.xlsx]

## Sheet: Diff_distribution
Compared sample name	Up-regulated	Down-regulated
as_sp/c_sp	701	729

## Sheet: as_spvsc_sp
Protein accession	Protein description	Gene name	as_sp/c_sp Ratio	as_sp/c_sp P value	Regulated Type	MW [kDa]	Coverage [%]	Peptides	Unique peptides	as_sp_1	as_sp_2	as_sp_3	c_sp_1	c_sp_2	c_sp_3	Subcellular localization	KEGG KO No.	KEGG Gene	KEGG pathway	Biological Process	Cellular Component	Molecular Function	Pfam ID	Domain description	KOG category	KOG NO.	KOG description
P52566	Rho GDP-dissociation inhibitor 2 OS=Homo sapiens OX=9606 GN=ARHGDIB PE=1 SV=3	ARHGDIB	0.0172	4.73564e-07	Down	22.988	46.8	8	8	0.031968	0.031612	0.037621	2.07107	2.00614	1.82158	cytoplasm	K12462	ARHGDI; Rho GDP-dissociation inhibitor	hsa04722 Neurotrophin signaling pathway; hsa04962 Vasopressin-regulated water reabsorption	GO:0007162 negative regulation of cell adhesion; GO:0007275 multicellular organism development; GO:0009966 regulation of signal transduction; GO:0010646 regulation of cell communication; GO:0023051 regulation of signaling; GO:0030155 regulation of cell adhesion; GO:0030334 regulation of cell migration; GO:0030336 negative regulation of cell migration; GO:0032501 multicellular organismal process; …	GO:0005622 intracellular; GO:0005623 cell; GO:0005737 cytoplasm; GO:0005829 cytosol; GO:0005856 cytoskeleton; GO:0016020 membrane; GO:0031410 cytoplasmic vesicle; GO:0031982 vesicle; GO:0043226 organelle; GO:0043227 membrane-bounded organelle; GO:0043228 non-membrane-bounded organelle; GO:0043229 intracellular organelle; GO:0043232 intracellular non-membrane-bounded organelle; GO:0097708 intracel…	GO:0003824 catalytic activity; GO:0003924 GTPase activity; GO:0005092 GDP-dissociation inhibitor activity; GO:0005094 Rho GDP-dissociation inhibitor activity; GO:0005488 binding; GO:0005515 protein binding; GO:0016462 pyrophosphatase activity; GO:0016787 hydrolase activity; GO:0016817 hydrolase activity, acting on acid anhydrides; GO:0016818 hydrolase activity, acting on acid anhydrides, in phosp…	PF02115	RHO protein GDP dissociation inhibitor	T	KOG3205	Rho GDP-dissociation inhibitor
O75594	Peptidoglycan recognition protein 1 OS=Homo sapiens OX=9606 GN=PGLYRP1 PE=1 SV=1	PGLYRP1	0.0209	1.69263e-06	Down	21.731	41.3	5	5	0.045918	0.041677	0.034958	1.82072	1.96406	2.09266	extracellular	K01446			GO:0001775 cell activation; GO:0001906 cell killing; GO:0002218 activation of innate immune response; GO:0002221 pattern recognition receptor signaling pathway; GO:0002252 immune effector process; GO:0002253 activation of immune response; GO:0002263 cell activation involved in immune response; GO:0002274 myeloid leukocyte activation; GO:0002275 myeloid cell activation involved in immune response;…	GO:0005576 extracellular region; GO:0005622 intracellular; GO:0005623 cell; GO:0005737 cytoplasm; GO:0012505 endomembrane system; GO:0030139 endocytic vesicle; GO:0030141 secretory granule; GO:0031410 cytoplasmic vesicle; GO:0031974 membrane-enclosed lumen; GO:0031982 vesicle; GO:0031983 vesicle lumen; GO:0034774 secretory granule lumen; GO:0035580 specific granule lumen; GO:0042581 specific gran…	GO:0005488 binding; GO:0005539 glycosaminoglycan binding; GO:0016019 peptidoglycan immune receptor activity; GO:0038023 signaling receptor activity; GO:0038187 pattern recognition receptor activity; GO:0042834 peptidoglycan binding; GO:0060089 molecular transducer activity; GO:0097367 carbohydrate derivative binding;	PF01510	N-acetylmuramoyl-L-alanine amidase
P61626	Lysozyme C OS=Homo sapiens OX=9606 GN=LYZ PE=1 SV=1	LYZ	0.0357	4.45409e-06	Down	16.537	51.4	6	6	0.060017	0.064377	0.082525	1.97682	1.86484	1.95143	extracellular	K13915	LYZ; lysozyme C [EC:3.2.1.17]	hsa04970 Salivary secretion	GO:0001775 cell activation; GO:0001906 cell killing; GO:0002252 immune effector process; GO:0002263 cell activation involved in immune response; GO:0002274 myeloid leukocyte activation; GO:0002275 myeloid cell activation involved in immune response; GO:0002283 neutrophil activation involved in immune response; GO:0002366 leukocyte activation involved in immune response; GO:0002376 immune system p…	GO:0000323 lytic vacuole; GO:0005576 extracellular region; GO:0005615 extracellular space; GO:0005622 intracellular; GO:0005623 cell; GO:0005737 cytoplasm; GO:0005764 lysosome; GO:0005766 primary lysosome; GO:0005773 vacuole; GO:0005775 vacuolar lumen; GO:0012505 endomembrane system; GO:0030141 secretory granule; GO:0031410 cytoplasmic vesicle; GO:0031974 membrane-enclosed lumen; GO:0031982 vesic…	GO:0003796 lysozyme activity; GO:0003824 catalytic activity; GO:0004553 hydrolase activity, hydrolyzing O-glycosyl compounds; GO:0005488 binding; GO:0005515 protein binding; GO:0016787 hydrolase activity; GO:0016798 hydrolase activity, acting on glycosyl bonds; GO:0042802 identical protein binding; GO:0061783 peptidoglycan muralytic activity;	PF00062	C-type lysozyme/alpha-lactalbumin family
P24158	Myeloblastin OS=Homo sapiens OX=9606 GN=PRTN3 PE=1 SV=3	PRTN3	0.0381	1.04161e-08	Down	27.807	38.3	7	7	0.071081	0.074954	0.074294	1.91816	1.97449	1.88702	extracellular	K01350			GO:0001775 cell activation; GO:0002252 immune effector process; GO:0002253 activation of immune response; GO:0002263 cell activation involved in immune response; GO:0002274 myeloid leukocyte activation; GO:0002275 myeloid cell activation involved in immune response; GO:0002283 neutrophil activation involved in immune response; GO:0002366 leukocyte activation involved in immune response; GO:000237…	GO:0000323 lytic vacuole; GO:0005576 extracellular region; GO:0005622 intracellular; GO:0005623 cell; GO:0005737 cytoplasm; GO:0005764 lysosome; GO:0005766 primary lysosome; GO:0005773 vacuole; GO:0005775 vacuolar lumen; GO:0005829 cytosol; GO:0005886 plasma membrane; GO:0012505 endomembrane system; GO:0016020 membrane; GO:0030141 secretory granule; GO:0031091 platelet alpha granule; GO:0031093 p…	GO:0003824 catalytic activity; GO:0004175 endopeptidase activity; GO:0004252 serine-type endopeptidase activity; GO:0005102 signaling receptor binding; GO:0005488 binding; GO:0005515 protein binding; GO:0008233 peptidase activity; GO:0008236 serine-type peptidase activity; GO:0016787 hydrolase activity; GO:0017171 serine hydrolase activity; GO:0019899 enzyme binding; GO:0070011 peptidase activity…	PF00089	Trypsin	O	KOG3627	Trypsin
P08246	Neutrophil elastase OS=Homo sapiens OX=9606 GN=ELANE PE=1 SV=1	ELANE	0.0444	1.19081e-06	Down	28.518	36.3	6	6	0.083469	0.07639	0.095357	1.96354	1.87454	1.9067	extracellular	K01327	ELANE; leukocyte elastase [EC:3.4.21.37]	hsa05322 Systemic lupus erythematosus; hsa05202 Transcriptional misregulation in cancer	GO:0000122 negative regulation of transcription by RNA polymerase II; GO:0001775 cell activation; GO:0001817 regulation of cytokine production; GO:0001818 negative regulation of cytokine production; GO:0001819 positive regulation of cytokine production; GO:0001878 response to yeast; GO:0001906 cell killing; GO:0001909 leukocyte mediated cytotoxicity; GO:0001932 regulation of protein phosphorylati…	GO:0000323 lytic vacuole; GO:0005576 extracellular region; GO:0005615 extracellular space; GO:0005622 intracellular; GO:0005623 cell; GO:0005737 cytoplasm; GO:0005764 lysosome; GO:0005766 primary lysosome; GO:0005773 vacuole; GO:0005775 vacuolar lumen; GO:0009986 cell surface; GO:0012505 endomembrane system; GO:0017053 transcription repressor complex; GO:0030141 secretory granule; GO:0031410 cyto…	GO:0002020 protease binding; GO:0003712 transcription coregulator activity; GO:0003714 transcription corepressor activity; GO:0003824 catalytic activity; GO:0004175 endopeptidase activity; GO:0004252 serine-type endopeptidase activity; GO:0005488 binding; GO:0005515 protein binding; GO:0005539 glycosaminoglycan binding; GO:0008201 heparin binding; GO:0008233 peptidase activity; GO:0008236 serine-…	PF00089	Trypsin	O	KOG3627	Trypsin
P41218	Myeloid cell nuclear differentiation antigen OS=Homo sapiens OX=9606 GN=MNDA PE=1 SV=1	MNDA	0.0489	1.48498e-06	Down	45.836	32.4	12	12	0.083234	0.101465	0.094864	1.78666	2.00784	1.92593	nucleus				GO:0000122 negative regulation of transcription by RNA polymerase II; GO:0001775 cell activation; GO:0001817 regulation of cytokine production; GO:0001819 positive regulation of cytokine production; GO:0002218 activation of innate immune response; GO:0002252 immune effector process; GO:0002253 activation of immune response; GO:0002263 cell activation involved in immune response; GO:0002274 myeloi…	GO:0000323 lytic vacuole; GO:0005576 extracellular region; GO:0005622 intracellular; GO:0005623 cell; GO:0005634 nucleus; GO:0005654 nucleoplasm; GO:0005730 nucleolus; GO:0005737 cytoplasm; GO:0005764 lysosome; GO:0005766 primary lysosome; GO:0005773 vacuole; GO:0005775 vacuolar lumen; GO:0005829 cytosol; GO:0012505 endomembrane system; GO:0016604 nuclear body; GO:0016607 nuclear speck; GO:003014…	GO:0000976 transcription regulatory region sequence-specific DNA binding; GO:0000977 RNA polymerase II transcription regulatory region sequence-specific DNA binding; GO:0000978 RNA polymerase II cis-regulatory region sequence-specific DNA binding; GO:0000981 DNA-binding transcription factor activity, RNA polymerase II-specific; GO:0000987 cis-regulatory region sequence-specific DNA binding; GO:00…	PF02758	PAAD/DAPIN/Pyrin domain
P31146	Coronin-1A OS=Homo sapiens OX=9606 GN=CORO1A PE=1 SV=4	CORO1A	0.0544	4.5049e-07	Down	51.026	19.7	7	7	0.101616	0.095557	0.112638	1.88434	1.8903	1.91555	mitochondria	K13882	CORO1A; coronin-1A	hsa04145 Phagosome; hsa05152 Tuberculosis	GO:0001775 cell activation; GO:0001776 leukocyte homeostasis; GO:0001845 phagolysosome assembly; GO:0001894 tissue homeostasis; GO:0001906 cell killing; GO:0001909 leukocyte mediated cytotoxicity; GO:0002228 natural killer cell mediated immunity; GO:0002252 immune effector process; GO:0002260 lymphocyte homeostasis; GO:0002263 cell activation involved in immune response; GO:0002285 lymphocyte act…	GO:0001772 immunological synapse; GO:0001891 phagocytic cup; GO:0005622 intracellular; GO:0005623 cell; GO:0005737 cytoplasm; GO:0005768 endosome; GO:0005769 early endosome; GO:0005856 cytoskeleton; GO:0005884 actin filament; GO:0005886 plasma membrane; GO:0005911 cell-cell junction; GO:0005938 cell cortex; GO:0012505 endomembrane system; GO:0015629 actin cytoskeleton; GO:0016020 membrane; GO:003…	GO:0003779 actin binding; GO:0003785 actin monomer binding; GO:0005488 binding; GO:0005515 protein binding; GO:0008022 protein C-terminus binding; GO:0008092 cytoskeletal protein binding; GO:0017022 myosin binding; GO:0032036 myosin heavy chain binding; GO:0042802 identical protein binding; GO:0042803 protein homodimerization activity; GO:0043548 phosphatidylinositol 3-kinase binding; GO:0044877 …	PF08953; PF08954	Domain of unknown function (DUF1899); Domain of unknown function (DUF1900)	Z	KOG0303	Actin-binding protein Coronin, contains WD40 repeats
Q9Y3Z3	Deoxynucleoside triphosphate triphosphohydrolase SAMHD1 OS=Homo sapiens OX=9606 GN=SAMHD1 PE=1 SV=2	SAMHD1	0.0641	0.000124178	Down	72.2	28.9	14	14	0.115322	0.084636	0.161218	1.98174	1.89062	1.76646	nucleus	K22544	SAMHD1; deoxynucleoside triphosphate triphosphohydrolase SAMHD1 [EC:3.1.5.-]	hsa05170 Human immunodeficiency virus 1 infection	GO:0002252 immune effector process; GO:0002376 immune system process; GO:0002682 regulation of immune system process; GO:0006139 nucleobase-containing compound metabolic process; GO:0006163 purine nucleotide metabolic process; GO:0006195 purine nucleotide catabolic process; GO:0006203 dGTP catabolic process; GO:0006725 cellular aromatic compound metabolic process; GO:0006753 nucleoside phosphate …	GO:0005622 intracellular; GO:0005623 cell; GO:0005634 nucleus; GO:0005654 nucleoplasm; GO:0005886 plasma membrane; GO:0016020 membrane; GO:0031974 membrane-enclosed lumen; GO:0031981 nuclear lumen; GO:0043226 organelle; GO:0043227 membrane-bounded organelle; GO:0043229 intracellular organelle; GO:0043231 intracellular membrane-bounded organelle; GO:0043233 organelle lumen; GO:0070013 intracellula…	GO:0000166 nucleotide binding; GO:0003676 nucleic acid binding; GO:0003723 RNA binding; GO:0003824 catalytic activity; GO:0004518 nuclease activity; GO:0004540 ribonuclease activity; GO:0005488 binding; GO:0005515 protein binding; GO:0008270 zinc ion binding; GO:0008832 dGTPase activity; GO:0016787 hydrolase activity; GO:0016788 hydrolase activity, acting on ester bonds; GO:0016793 triphosphoric …	PF07647	SAM domain (Sterile alpha motif)	S	KOG2681	Metal-dependent phosphohydrolase
O00602	Ficolin-1 OS=Homo sapiens OX=9606 GN=FCN1 PE=1 SV=2	FCN1	0.0677	4.31503e-06	Down	35.078	8.6	2	2	0.151642	0.147751	0.161245		2.28221	2.25715	extracellular	K10104			GO:0001775 cell activation; GO:0001817 regulation of cytokine production; GO:0001819 positive regulation of cytokine production; GO:0001867 complement activation, lectin pathway; GO:0002218 activation of innate immune response; GO:0002220 innate immune response activating cell surface receptor signaling pathway; GO:0002221 pattern recognition receptor signaling pathway; GO:0002252 immune effector…	GO:0005576 extracellular region; GO:0005622 intracellular; GO:0005623 cell; GO:0005737 cytoplasm; GO:0005886 plasma membrane; GO:0009897 external side of plasma membrane; GO:0009986 cell surface; GO:0012505 endomembrane system; GO:0016020 membrane; GO:0019897 extrinsic component of plasma membrane; GO:0019898 extrinsic component of membrane; GO:0030141 secretory granule; GO:0031232 extrinsic comp…	GO:0001664 G protein-coupled receptor binding; GO:0003824 catalytic activity; GO:0004175 endopeptidase activity; GO:0004252 serine-type endopeptidase activity; GO:0005102 signaling receptor binding; GO:0005488 binding; GO:0005515 protein binding; GO:0008233 peptidase activity; GO:0008236 serine-type peptidase activity; GO:0016787 hydrolase activity; GO:0017171 serine hydrolase activity; GO:003140…	PF00147	Fibrinogen beta and gamma chains, C-terminal globular domain	S	KOG2579	Ficolin and related extracellular proteins
P05164	Myeloperoxidase OS=Homo sapiens OX=9606 GN=MPO PE=1 SV=1	MPO	0.0766	9.98933e-10	Down	83.868	44.4	26	25	0.140276	0.14259	0.144042	1.86564	1.86844	1.83901	extracellular	K10789	MPO; myeloperoxidase [EC:1.11.2.2]	hsa00983 Drug metabolism - other enzymes; hsa04145 Phagosome; hsa05221 Acute myeloid leukemia; hsa05202 Transcriptional misregulation in cancer	GO:0000302 response to reactive oxygen species; GO:0000303 response to superoxide; GO:0000305 response to oxygen radical; GO:0001775 cell activation; GO:0001878 response to yeast; GO:0002148 hypochlorous acid metabolic process; GO:0002149 hypochlorous acid biosynthetic process; GO:0002252 immune effector process; GO:0002263 cell activation involved in immune response; GO:0002274 myeloid leukocyte…	GO:0000323 lytic vacuole; GO:0005576 extracellular region; GO:0005615 extracellular space; GO:0005622 intracellular; GO:0005623 cell; GO:0005634 nucleus; GO:0005737 cytoplasm; GO:0005764 lysosome; GO:0005766 primary lysosome; GO:0005773 vacuole; GO:0005775 vacuolar lumen; GO:0012505 endomembrane system; GO:0030141 secretory granule; GO:0031410 cytoplasmic vesicle; GO:0031974 membrane-enclosed lum…	GO:0003682 chromatin binding; GO:0003824 catalytic activity; GO:0004601 peroxidase activity; GO:0005488 binding; GO:0005539 glycosaminoglycan binding; GO:0008201 heparin binding; GO:0016209 antioxidant activity; GO:0016491 oxidoreductase activity; GO:0016684 oxidoreductase activity, acting on peroxide as acceptor; GO:0043167 ion binding; GO:0043168 anion binding; GO:0097367 carbohydrate derivativ…	PF03098	Animal haem peroxidase	S	KOG2408	Peroxidase/oxygenase
O75368	SH3 domain-binding glutamic acid-rich-like protein OS=Homo sapiens OX=9606 GN=SH3BGRL PE=1 SV=1	SH3BGRL	0.0803	2.37362e-06	Down	12.774	20.2	2	2	0.146143	0.133822	0.165966	1.81582	1.88509	1.85316	mitochondria	K23740			GO:0009966 regulation of signal transduction; GO:0009967 positive regulation of signal transduction; GO:0010646 regulation of cell communication; GO:0010647 positive regulation of cell communication; GO:0023051 regulation of signaling; GO:0023056 positive regulation of signaling; GO:0048518 positive regulation of biological process; GO:0048522 positive regulation of cellular process; GO:0048583 r…	GO:0005622 intracellular; GO:0005623 cell; GO:0005634 nucleus; GO:0005737 cytoplasm; GO:0043226 organelle; GO:0043227 membrane-bounded organelle; GO:0043229 intracellular organelle; GO:0043231 intracellular membrane-bounded organelle;	GO:0005488 binding; GO:0005515 protein binding; GO:0030674 protein-macromolecule adaptor activity; GO:0035591 signaling adaptor activity; GO:0060090 molecular adaptor activity;			S	KOG4023	Uncharacterized conserved protein
P04839	Cytochrome b-245 heavy chain OS=Homo sapiens OX=9606 GN=CYBB PE=1 SV=2	CYBB	0.0834	5.50403e-06	Down	65.335	18.9	11	11	0.137628	0.146496	0.177541	1.81387	1.85133	1.87313	plasma membrane	K21421	NOX2; NADPH oxidase 2 [EC:1.-.-.-]	hsa04216 Ferroptosis; hsa05140 Leishmaniasis; hsa05010 Alzheimer disease; hsa04066 HIF-1 signaling pathway; hsa04621 NOD-like receptor signaling pathway; hsa04145 Phagosome; hsa04670 Leukocyte transendothelial migration; hsa05022 Pathways of neurodegeneration - multiple diseases; hsa05020 Prion disease; hsa04217 Necroptosis; hsa05171 Coronavirus disease - COVID-19; hsa04933 AGE-RAGE signaling pat…	GO:0001666 response to hypoxia; GO:0001775 cell activation; GO:0001817 regulation of cytokine production; GO:0001819 positive regulation of cytokine production; GO:0002252 immune effector process; GO:0002263 cell activation involved in immune response; GO:0002274 myeloid leukocyte activation; GO:0002275 myeloid cell activation involved in immune response; GO:0002283 neutrophil activation involved…	GO:0000323 lytic vacuole; GO:0005622 intracellular; GO:0005623 cell; GO:0005634 nucleus; GO:0005635 nuclear envelope; GO:0005737 cytoplasm; GO:0005764 lysosome; GO:0005773 vacuole; GO:0005783 endoplasmic reticulum; GO:0005789 endoplasmic reticulum membrane; GO:0005791 rough endoplasmic reticulum; GO:0005794 Golgi apparatus; GO:0005886 plasma membrane; GO:0005887 integral component of plasma membr…	GO:0000166 nucleotide binding; GO:0003824 catalytic activity; GO:0005488 binding; GO:0005515 protein binding; GO:0016175 superoxide-generating NADPH oxidase activity; GO:0016491 oxidoreductase activity; GO:0016651 oxidoreductase activity, acting on NAD(P)H; GO:0020037 heme binding; GO:0036094 small molecule binding; GO:0043167 ion binding; GO:0043168 anion binding; GO:0046906 tetrapyrrole binding…	PF08022; PF08030	FAD-binding domain; Ferric reductase NAD binding domain	C	KOG0039	Ferric reductase, NADH/NADPH oxidase and related proteins
Q86UX7	Fermitin family homolog 3 OS=Homo sapiens OX=9606 GN=FERMT3 PE=1 SV=1	FERMT3	0.0887	0.0157243	Down	75.952	33	17	17	0.096725		0.182415	0.772581	2.29987	1.64841	nucleus	K17084	FERMT3; kindlin 3	hsa04611 Platelet activation	GO:0000902 cell morphogenesis; GO:0000904 cell morphogenesis involved in differentiation; GO:0001775 cell activation; GO:0002576 platelet degranulation; GO:0006810 transport; GO:0006887 exocytosis; GO:0006950 response to stress; GO:0007154 cell communication; GO:0007155 cell adhesion; GO:0007159 leukocyte cell-cell adhesion; GO:0007165 signal transduction; GO:0007166 cell surface receptor signali…	GO:0002102 podosome; GO:0005576 extracellular region; GO:0005622 intracellular; GO:0005623 cell; GO:0005737 cytoplasm; GO:0005856 cytoskeleton; GO:0012505 endomembrane system; GO:0015629 actin cytoskeleton; GO:0030141 secretory granule; GO:0031091 platelet alpha granule; GO:0031093 platelet alpha granule lumen; GO:0031410 cytoplasmic vesicle; GO:0031974 membrane-enclosed lumen; GO:0031982 vesicle…	GO:0005102 signaling receptor binding; GO:0005178 integrin binding; GO:0005488 binding; GO:0005515 protein binding; GO:0044877 protein-containing complex binding; GO:0050839 cell adhesion molecule binding;	PF00373; PF00169	FERM central domain; PH domain	D	KOG3727	Mitogen inducible gene product (contains ERM and PH domains)
P20160	Azurocidin OS=Homo sapiens OX=9606 GN=AZU1 PE=1 SV=3	AZU1	0.0904	1.42178e-08	Down	26.885	39.4	6	6	0.162886	0.163955	0.170436	1.86734	1.82045	1.81494	extracellular				GO:0001774 microglial cell activation; GO:0001775 cell activation; GO:0001817 regulation of cytokine production; GO:0001819 positive regulation of cytokine production; GO:0001906 cell killing; GO:0001909 leukocyte mediated cytotoxicity; GO:0001932 regulation of protein phosphorylation; GO:0001934 positive regulation of protein phosphorylation; GO:0002252 immune effector process; GO:0002263 cell a…	GO:0000323 lytic vacuole; GO:0005576 extracellular region; GO:0005615 extracellular space; GO:0005622 intracellular; GO:0005623 cell; GO:0005737 cytoplasm; GO:0005764 lysosome; GO:0005765 lysosomal membrane; GO:0005766 primary lysosome; GO:0005773 vacuole; GO:0005774 vacuolar membrane; GO:0005775 vacuolar lumen; GO:0012505 endomembrane system; GO:0012506 vesicle membrane; GO:0016020 membrane; GO:…	GO:0003824 catalytic activity; GO:0005488 binding; GO:0005515 protein binding; GO:0005539 glycosaminoglycan binding; GO:0008201 heparin binding; GO:0008233 peptidase activity; GO:0015643 toxic substance binding; GO:0016787 hydrolase activity; GO:0043167 ion binding; GO:0043168 anion binding; GO:0043394 proteoglycan binding; GO:0043395 heparan sulfate proteoglycan binding; GO:0097367 carbohydrate …	PF00089	Trypsin	E	KOG3627	Trypsin
Q9Y6N5	Sulfide:quinone oxidoreductase, mitochondrial OS=Homo sapiens OX=9606 GN=SQOR PE=1 SV=1	SQOR	0.092	6.93235e-05	Down	49.96	27.6	10	10	0.186196	0.179928	0.139336	2.18866	1.51914	1.78674	mitochondria	K22470	SQOR; eukaryotic sulfide quinone oxidoreductase [EC:1.8.5.8]	hsa00920 Sulfur metabolism; hsa01100 Metabolic pathways	GO:0006790 sulfur compound metabolic process; GO:0008152 metabolic process; GO:0009404 toxin metabolic process; GO:0009987 cellular process; GO:0017144 drug metabolic process; GO:0019418 sulfide oxidation; GO:0019748 secondary metabolic process; GO:0044237 cellular metabolic process; GO:0055114 oxidation-reduction process; GO:0070221 sulfide oxidation, using sulfide:quinone oxidoreductase; GO:007…	GO:0005622 intracellular; GO:0005623 cell; GO:0005737 cytoplasm; GO:0005739 mitochondrion; GO:0005740 mitochondrial envelope; GO:0005743 mitochondrial inner membrane; GO:0016020 membrane; GO:0019866 organelle inner membrane; GO:0031090 organelle membrane; GO:0031966 mitochondrial membrane; GO:0031967 organelle envelope; GO:0031975 envelope; GO:0043226 organelle; GO:0043227 membrane-bounded organe…	GO:0003824 catalytic activity; GO:0016491 oxidoreductase activity; GO:0016667 oxidoreductase activity, acting on a sulfur group of donors; GO:0016672 oxidoreductase activity, acting on a sulfur group of donors, quinone or similar compound as acceptor; GO:0070224 sulfide:quinone oxidoreductase activity;	PF07992	Pyridine nucleotide-disulphide oxidoreductase	C	KOG3851	Sulfide:quinone oxidoreductase/flavo-binding protein
P30740	Leukocyte elastase inhibitor OS=Homo sapiens OX=9606 GN=SERPINB1 PE=1 SV=1	SERPINB1	0.0973	1.74854e-07	Down	42.741	49.9	18	17	0.167372	0.183407	0.181454	1.81507	1.85627	1.79642	cytoplasm	K23425			GO:0001775 cell activation; GO:0002252 immune effector process; GO:0002263 cell activation involved in immune response; GO:0002274 myeloid leukocyte activation; GO:0002275 myeloid cell activation involved in immune response; GO:0002283 neutrophil activation involved in immune response; GO:0002366 leukocyte activation involved in immune response; GO:0002376 immune system process; GO:0002443 leukoc…	GO:0005576 extracellular region; GO:0005615 extracellular space; GO:0005622 intracellular; GO:0005623 cell; GO:0005737 cytoplasm; GO:0012505 endomembrane system; GO:0030141 secretory granule; GO:0031410 cytoplasmic vesicle; GO:0031974 membrane-enclosed lumen; GO:0031982 vesicle; GO:0031983 vesicle lumen; GO:0034774 secretory granule lumen; GO:0043226 organelle; GO:0043227 membrane-bounded organel…	GO:0004857 enzyme inhibitor activity; GO:0004866 endopeptidase inhibitor activity; GO:0004867 serine-type endopeptidase inhibitor activity; GO:0030234 enzyme regulator activity; GO:0030414 peptidase inhibitor activity; GO:0061134 peptidase regulator activity; GO:0061135 endopeptidase regulator activity; GO:0098772 molecular function regulator;	PF00079	Serpin (serine protease inhibitor)	V	KOG2392	Serpin
A0A1B0GUW6	Uncharacterized protein SPEM3 OS=Homo sapiens OX=9606 GN=SPEM3 PE=3 SV=1	SPEM3	0.1013	7.65277e-05	Down	128.65	34.6	30	30	0.221278	0.180495	0.150115	1.64603	1.68383	2.11825	cytoplasm
P11215	Integrin alpha-M OS=Homo sapiens OX=9606 GN=ITGAM PE=1 SV=2	ITGAM	0.1113	2.21148e-08	Down	127.18	36	34	33	0.197535	0.202364	0.20101	1.7737	1.76946	1.85593	extracellular	K06461	ITGAM; integrin alpha M	hsa05134 Legionellosis; hsa04610 Complement and coagulation cascades; hsa05150 Staphylococcus aureus infection; hsa05146 Amoebiasis; hsa05152 Tuberculosis; hsa05140 Leishmaniasis; hsa05221 Acute myeloid leukemia; hsa05202 Transcriptional misregulation in cancer; hsa04810 Regulation of actin cytoskeleton; hsa04145 Phagosome; hsa05133 Pertussis; hsa04670 Leukocyte transendothelial migration; hsa040…	GO:0001774 microglial cell activation; GO:0001775 cell activation; GO:0001776 leukocyte homeostasis; GO:0001780 neutrophil homeostasis; GO:0001781 neutrophil apoptotic process; GO:0002218 activation of innate immune response; GO:0002221 pattern recognition receptor signaling pathway; GO:0002224 toll-like receptor signaling pathway; GO:0002252 immune effector process; GO:0002253 activation of immu…	GO:0005576 extracellular region; GO:0005615 extracellular space; GO:0005622 intracellular; GO:0005623 cell; GO:0005634 nucleus; GO:0005737 cytoplasm; GO:0005886 plasma membrane; GO:0005887 integral component of plasma membrane; GO:0008305 integrin complex; GO:0009897 external side of plasma membrane; GO:0009986 cell surface; GO:0012505 endomembrane system; GO:0012506 vesicle membrane; GO:0016020 …	GO:0001846 opsonin binding; GO:0001848 complement binding; GO:0001851 complement component C3b binding; GO:0005488 binding; GO:0005515 protein binding; GO:0005539 glycosaminoglycan binding; GO:0008201 heparin binding; GO:0031072 heat shock protein binding; GO:0038023 signaling receptor activity; GO:0043167 ion binding; GO:0043168 anion binding; GO:0043394 proteoglycan binding; GO:0043395 heparan …	PF00092	von Willebrand factor type A domain	W	KOG3637	Vitronectin receptor, alpha subunit
A6NFR6	Uncharacterized protein C5orf60 OS=Homo sapiens OX=9606 GN=C5orf60 PE=1 SV=2	C5orf60	0.1116	5.23948e-05	Down	39.25	22.1	6	6		0.158986	0.187129	1.51094	1.56209	1.58085	cytoplasm
P21333	Filamin-A OS=Homo sapiens OX=9606 GN=FLNA PE=1 SV=4	FLNA	0.1137	1.03849e-07	Down	280.74	30.1	50	45	0.203392	0.204217	0.204815	1.71621	1.80126	1.87011	cytoplasm	K04437	FLNA; filamin	hsa04510 Focal adhesion; hsa05132 Salmonella infection; hsa05205 Proteoglycans in cancer; hsa04010 MAPK signaling pathway	GO:0000003 reproduction; GO:0000226 microtubule cytoskeleton organization; GO:0000278 mitotic cell cycle; GO:0000280 nuclear division; GO:0000902 cell morphogenesis; GO:0000904 cell morphogenesis involved in differentiation; GO:0001525 angiogenesis; GO:0001568 blood vessel development; GO:0001775 cell activation; GO:0001837 epithelial to mesenchymal transition; GO:0001944 vasculature development;…	GO:0005576 extracellular region; GO:0005622 intracellular; GO:0005623 cell; GO:0005634 nucleus; GO:0005694 chromosome; GO:0005730 nucleolus; GO:0005737 cytoplasm; GO:0005794 Golgi apparatus; GO:0005802 trans-Golgi network; GO:0005829 cytosol; GO:0005856 cytoskeleton; GO:0005884 actin filament; GO:0005886 plasma membrane; GO:0005903 brush border; GO:0005911 cell-cell junction; GO:0005938 cell cort…	GO:0001664 G protein-coupled receptor binding; GO:0003779 actin binding; GO:0005080 protein kinase C binding; GO:0005102 signaling receptor binding; GO:0005488 binding; GO:0005515 protein binding; GO:0008092 cytoskeletal protein binding; GO:0008134 transcription factor binding; GO:0015459 potassium channel regulator activity; GO:0016247 channel regulator activity; GO:0017016 Ras GTPase binding; G…	PF00307; PF00630	Calponin homology (CH) domain; Filamin/ABP280 repeat	Z	KOG0518	Actin-binding cytoskeleton protein, filamin
P09917	Polyunsaturated fatty acid 5-lipoxygenase OS=Homo sapiens OX=9606 GN=ALOX5 PE=1 SV=2	ALOX5	0.1165	0.000227435	Down	77.982	31.2	18	18	0.283815	0.165264	0.176855	1.70644	1.89379	1.77383	cytoplasm	K00461	ALOX5; arachidonate 5-lipoxygenase [EC:1.13.11.34]	hsa04913 Ovarian steroidogenesis; hsa04664 Fc epsilon RI signaling pathway; hsa00590 Arachidonic acid metabolism; hsa05145 Toxoplasmosis; hsa04726 Serotonergic synapse; hsa01100 Metabolic pathways	GO:0001676 long-chain fatty acid metabolic process; GO:0001775 cell activation; GO:0002252 immune effector process; GO:0002263 cell activation involved in immune response; GO:0002274 myeloid leukocyte activation; GO:0002275 myeloid cell activation involved in immune response; GO:0002283 neutrophil activation involved in immune response; GO:0002366 leukocyte activation involved in immune response;…	GO:0005576 extracellular region; GO:0005622 intracellular; GO:0005623 cell; GO:0005634 nucleus; GO:0005635 nuclear envelope; GO:0005641 nuclear envelope lumen; GO:0005654 nucleoplasm; GO:0005737 cytoplasm; GO:0005829 cytosol; GO:0005886 plasma membrane; GO:0012505 endomembrane system; GO:0016020 membrane; GO:0016363 nuclear matrix; GO:0030141 secretory granule; GO:0030425 dendrite; GO:0031090 org…	GO:0003824 catalytic activity; GO:0004051 arachidonate 5-lipoxygenase activity; GO:0005488 binding; GO:0005506 iron ion binding; GO:0016491 oxidoreductase activity; GO:0016701 oxidoreductase activity, acting on single donors with incorporation of molecular oxygen; GO:0016702 oxidoreductase activity, acting on single donors with incorporation of molecular oxygen, incorporation of two atoms of oxyg…	PF01477; PF00305	PLAT/LH2 domain; Lipoxygenase
P05107	Integrin beta-2 OS=Homo sapiens OX=9606 GN=ITGB2 PE=1 SV=2	ITGB2	0.1375	8.50597e-07	Down	84.781	46.4	27	27	0.247556	0.22577	0.252087	1.71795	1.82072	1.73592	plasma membrane	K06464	ITGB2; integrin beta 2	hsa04650 Natural killer cell mediated cytotoxicity; hsa05166 Human T-cell leukemia virus 1 infection; hsa05416 Viral myocarditis; hsa04670 Leukocyte transendothelial migration; hsa04015 Rap1 signaling pathway; hsa04514 Cell adhesion molecules; hsa05323 Rheumatoid arthritis; hsa05144 Malaria; hsa05134 Legionellosis; hsa05152 Tuberculosis; hsa05146 Amoebiasis; hsa05150 Staphylococcus aureus infecti…	GO:0001505 regulation of neurotransmitter levels; GO:0001667 ameboidal-type cell migration; GO:0001704 formation of primary germ layer; GO:0001706 endoderm formation; GO:0001774 microglial cell activation; GO:0001775 cell activation; GO:0001932 regulation of protein phosphorylation; GO:0002218 activation of innate immune response; GO:0002221 pattern recognition receptor signaling pathway; GO:0002…	GO:0005622 intracellular; GO:0005623 cell; GO:0005737 cytoplasm; GO:0005886 plasma membrane; GO:0005887 integral component of plasma membrane; GO:0008305 integrin complex; GO:0009897 external side of plasma membrane; GO:0009986 cell surface; GO:0012505 endomembrane system; GO:0012506 vesicle membrane; GO:0016020 membrane; GO:0016021 integral component of membrane; GO:0030141 secretory granule; GO…	GO:0001540 amyloid-beta binding; GO:0001846 opsonin binding; GO:0001848 complement binding; GO:0001851 complement component C3b binding; GO:0004888 transmembrane signaling receptor activity; GO:0005488 binding; GO:0005515 protein binding; GO:0019899 enzyme binding; GO:0019900 kinase binding; GO:0019901 protein kinase binding; GO:0030369 ICAM-3 receptor activity; GO:0031072 heat shock protein bind…	PF00362; PF07965; PF08725	Integrin, beta chain; Integrin beta tail domain; Integrin beta cytoplasmic domain	T	KOG1226	Integrin beta subunit (N-terminal portion of extracellular region)
P08311	Cathepsin G OS=Homo sapiens OX=9606 GN=CTSG PE=1 SV=2	CTSG	0.1401	1.66451e-06	Down	28.837	50.6	12	12	0.234111	0.237608	0.26554	1.78377	1.79874	1.68023	extracellular	K01319	CTSG; cathepsin G [EC:3.4.21.20]	hsa04142 Lysosome; hsa05322 Systemic lupus erythematosus; hsa04080 Neuroactive ligand-receptor interaction; hsa05146 Amoebiasis; hsa04614 Renin-angiotensin system	GO:0001775 cell activation; GO:0001906 cell killing; GO:0001909 leukocyte mediated cytotoxicity; GO:0001990 regulation of systemic arterial blood pressure by hormone; GO:0001991 regulation of systemic arterial blood pressure by circulatory renin-angiotensin; GO:0002002 regulation of angiotensin levels in blood; GO:0002003 angiotensin maturation; GO:0002237 response to molecule of bacterial origin…	GO:0000323 lytic vacuole; GO:0005622 intracellular; GO:0005623 cell; GO:0005737 cytoplasm; GO:0005764 lysosome; GO:0005766 primary lysosome; GO:0005773 vacuole; GO:0005775 vacuolar lumen; GO:0005886 plasma membrane; GO:0010494 cytoplasmic stress granule; GO:0012505 endomembrane system; GO:0016020 membrane; GO:0030141 secretory granule; GO:0031410 cytoplasmic vesicle; GO:0031974 membrane-enclosed …	GO:0003824 catalytic activity; GO:0004175 endopeptidase activity; GO:0004252 serine-type endopeptidase activity; GO:0005488 binding; GO:0005539 glycosaminoglycan binding; GO:0008201 heparin binding; GO:0008233 peptidase activity; GO:0008236 serine-type peptidase activity; GO:0016787 hydrolase activity; GO:0017171 serine hydrolase activity; GO:0043167 ion binding; GO:0043168 anion binding; GO:0070…	PF00089	Trypsin	O	KOG3627	Trypsin
P29401	Transketolase OS=Homo sapiens OX=9606 GN=TKT PE=1 SV=3	TKT	0.1434	5.32113e-08	Down	67.877	49.9	21	21	0.244594	0.257476	0.250596	1.76217	1.7758	1.70936	cytoplasm	K00615	E2.2.1.1; transketolase [EC:2.2.1.1]	hsa01200 Carbon metabolism; hsa00030 Pentose phosphate pathway; hsa01230 Biosynthesis of amino acids; hsa01100 Metabolic pathways	GO:0005975 carbohydrate metabolic process; GO:0005996 monosaccharide metabolic process; GO:0005997 xylulose metabolic process; GO:0005999 xylulose biosynthetic process; GO:0006081 cellular aldehyde metabolic process; GO:0006098 pentose-phosphate shunt; GO:0006139 nucleobase-containing compound metabolic process; GO:0006725 cellular aromatic compound metabolic process; GO:0006732 coenzyme metaboli…	GO:0005622 intracellular; GO:0005623 cell; GO:0005634 nucleus; GO:0005654 nucleoplasm; GO:0005737 cytoplasm; GO:0005777 peroxisome; GO:0005783 endoplasmic reticulum; GO:0005789 endoplasmic reticulum membrane; GO:0005829 cytosol; GO:0012505 endomembrane system; GO:0016020 membrane; GO:0016604 nuclear body; GO:0016607 nuclear speck; GO:0031974 membrane-enclosed lumen; GO:0031981 nuclear lumen; GO:0…	GO:0000287 magnesium ion binding; GO:0003824 catalytic activity; GO:0004802 transketolase activity; GO:0005488 binding; GO:0005515 protein binding; GO:0016740 transferase activity; GO:0016744 transferase activity, transferring aldehyde or ketonic groups; GO:0019842 vitamin binding; GO:0030246 carbohydrate binding; GO:0030976 thiamine pyrophosphate binding; GO:0036094 small molecule binding; GO:00…	PF00456; PF02779; PF02780	Transketolase, thiamine diphosphate binding domain; Transketolase, pyrimidine binding domain; Transketolase, C-terminal domain	G	KOG0523	Transketolase
Q5JWF8	Actin-like protein 10 OS=Homo sapiens OX=9606 GN=ACTL10 PE=2 SV=1	ACTL10	0.1474	0.000227126	Down	26.751	26.9	5	5	0.322794	0.255836	0.192001	1.76509	1.82336	1.64093	extracellular									Z	KOG0676	Actin and related proteins
P00738	Haptoglobin OS=Homo sapiens OX=9606 GN=HP PE=1 SV=1	HP	0.1487	2.89363e-06	Down	45.205	26.4	9	9	0.234453	0.268244	0.274161	1.70348	1.77429	1.74537	extracellular	K16142			GO:0000003 reproduction; GO:0000302 response to reactive oxygen species; GO:0001101 response to acid chemical; GO:0001666 response to hypoxia; GO:0001775 cell activation; GO:0001889 liver development; GO:0002237 response to molecule of bacterial origin; GO:0002252 immune effector process; GO:0002263 cell activation involved in immune response; GO:0002274 myeloid leukocyte activation; GO:0002275 m…	GO:0005576 extracellular region; GO:0005615 extracellular space; GO:0005622 intracellular; GO:0005623 cell; GO:0005737 cytoplasm; GO:0005783 endoplasmic reticulum; GO:0005794 Golgi apparatus; GO:0012505 endomembrane system; GO:0030139 endocytic vesicle; GO:0030141 secretory granule; GO:0031410 cytoplasmic vesicle; GO:0031838 haptoglobin-hemoglobin complex; GO:0031974 membrane-enclosed lumen; GO:0…	GO:0005488 binding; GO:0005515 protein binding; GO:0030492 hemoglobin binding; GO:0042802 identical protein binding; GO:0042803 protein homodimerization activity; GO:0046983 protein dimerization activity;	PF00089	Trypsin	E	KOG3627	Trypsin
Q9HC84	Mucin-5B OS=Homo sapiens OX=9606 GN=MUC5B PE=1 SV=3	MUC5B	0.1545	2.5359e-05	Down	596.33	8.4	27	25	0.31369	0.238067	0.251109	1.69556	1.73535	1.76622	extracellular	K13908	MUC5B; mucin-5B	hsa04657 IL-17 signaling pathway; hsa04970 Salivary secretion	GO:0002218 activation of innate immune response; GO:0002220 innate immune response activating cell surface receptor signaling pathway; GO:0002223 stimulatory C-type lectin receptor signaling pathway; GO:0002253 activation of immune response; GO:0002376 immune system process; GO:0002429 immune response-activating cell surface receptor signaling pathway; GO:0002682 regulation of immune system proce…	GO:0005576 extracellular region; GO:0005622 intracellular; GO:0005623 cell; GO:0005737 cytoplasm; GO:0005794 Golgi apparatus; GO:0005796 Golgi lumen; GO:0005886 plasma membrane; GO:0012505 endomembrane system; GO:0016020 membrane; GO:0031974 membrane-enclosed lumen; GO:0043226 organelle; GO:0043227 membrane-bounded organelle; GO:0043229 intracellular organelle; GO:0043231 intracellular membrane-b…		PF08742; PF01826	C8 domain; Trypsin Inhibitor like cysteine rich domain	VW	KOG1216	von Willebrand factor and related coagulation proteins
Q9C099	Leucine-rich repeat and coiled-coil domain-containing protein 1 OS=Homo sapiens OX=9606 GN=LRRCC1 PE=1 SV=2	LRRCC1	0.1558	0.000713287	Down	119.59	7.7	5	5	0.255947	0.358424	0.194588	2.06562	1.59774	1.52768	cytoplasm	K16475				GO:0005622 intracellular; GO:0005623 cell; GO:0005737 cytoplasm; GO:0005813 centrosome; GO:0005814 centriole; GO:0005815 microtubule organizing center; GO:0005856 cytoskeleton; GO:0015630 microtubule cytoskeleton; GO:0043226 organelle; GO:0043228 non-membrane-bounded organelle; GO:0043229 intracellular organelle; GO:0043232 intracellular non-membrane-bounded organelle;				T	KOG0531	Protein phosphatase 1, regulatory subunit, and related proteins
P01833	Polymeric immunoglobulin receptor OS=Homo sapiens OX=9606 GN=PIGR PE=1 SV=4	PIGR	0.1634	1.80062e-06	Down	83.283	24.2	15	15	0.258236	0.287263	0.297297	1.72604	1.71131	1.71985	plasma membrane	K13073	PIGR; polymeric immunoglobulin receptor	hsa04672 Intestinal immune network for IgA production	GO:0001580 detection of chemical stimulus involved in sensory perception of bitter taste; GO:0001775 cell activation; GO:0002251 organ or tissue specific immune response; GO:0002252 immune effector process; GO:0002263 cell activation involved in immune response; GO:0002274 myeloid leukocyte activation; GO:0002275 myeloid cell activation involved in immune response; GO:0002283 neutrophil activatio…	GO:0000323 lytic vacuole; GO:0005576 extracellular region; GO:0005615 extracellular space; GO:0005622 intracellular; GO:0005623 cell; GO:0005737 cytoplasm; GO:0005764 lysosome; GO:0005765 lysosomal membrane; GO:0005766 primary lysosome; GO:0005768 endosome; GO:0005773 vacuole; GO:0005774 vacuolar membrane; GO:0005886 plasma membrane; GO:0005887 integral component of plasma membrane; GO:0010008 en…	GO:0001792 polymeric immunoglobulin receptor activity; GO:0004888 transmembrane signaling receptor activity; GO:0005102 signaling receptor binding; GO:0005154 epidermal growth factor receptor binding; GO:0005488 binding; GO:0005515 protein binding; GO:0019763 immunoglobulin receptor activity; GO:0038023 signaling receptor activity; GO:0060089 molecular transducer activity; GO:0070851 growth facto…	PF07686	Immunoglobulin V-set domain
P18206	Vinculin OS=Homo sapiens OX=9606 GN=VCL PE=1 SV=4	VCL	0.1668	4.75816e-07	Down	123.8	20.9	19	19	0.296892	0.291437	0.269497	1.69732	1.72504	1.71982	cytoplasm	K05700	VCL; vinculin	hsa05100 Bacterial invasion of epithelial cells; hsa04510 Focal adhesion; hsa04810 Regulation of actin cytoskeleton; hsa04520 Adherens junction; hsa05146 Amoebiasis; hsa04670 Leukocyte transendothelial migration; hsa05131 Shigellosis	GO:0000902 cell morphogenesis; GO:0000904 cell morphogenesis involved in differentiation; GO:0001775 cell activation; GO:0002009 morphogenesis of an epithelium; GO:0002252 immune effector process; GO:0002263 cell activation involved in immune response; GO:0002274 myeloid leukocyte activation; GO:0002275 myeloid cell activation involved in immune response; GO:0002283 neutrophil activation involved…	GO:0002102 podosome; GO:0005576 extracellular region; GO:0005622 intracellular; GO:0005623 cell; GO:0005737 cytoplasm; GO:0005829 cytosol; GO:0005856 cytoskeleton; GO:0005886 plasma membrane; GO:0005903 brush border; GO:0005911 cell-cell junction; GO:0005912 adherens junction; GO:0005915 zonula adherens; GO:0005916 fascia adherens; GO:0005925 focal adhesion; GO:0005938 cell cortex; GO:0012505 end…	GO:0002162 dystroglycan binding; GO:0003779 actin binding; GO:0005488 binding; GO:0005515 protein binding; GO:0008013 beta-catenin binding; GO:0008092 cytoskeletal protein binding; GO:0017016 Ras GTPase binding; GO:0017048 Rho GTPase binding; GO:0019899 enzyme binding; GO:0031267 small GTPase binding; GO:0031625 ubiquitin protein ligase binding; GO:0044389 ubiquitin-like protein ligase binding; G…			Z	KOG3681	Alpha-catenin
P29350	Tyrosine-protein phosphatase non-receptor type 6 OS=Homo sapiens OX=9606 GN=PTPN6 PE=1 SV=1	PTPN6	0.169	1.83534e-06	Down	67.56	27.9	13	13	0.276412	0.294542	0.296304	1.6081	1.70655	1.81809	cytoplasm	K05697	PTPN6; tyrosine-protein phosphatase non-receptor type 6 [EC:3.1.3.48]	hsa04662 B cell receptor signaling pathway; hsa05140 Leishmaniasis; hsa04650 Natural killer cell mediated cytotoxicity; hsa04520 Adherens junction; hsa05130 Pathogenic Escherichia coli infection; hsa05235 PD-L1 expression and PD-1 checkpoint pathway in cancer; hsa05205 Proteoglycans in cancer; hsa04630 JAK-STAT signaling pathway; hsa04660 T cell receptor signaling pathway	GO:0000278 mitotic cell cycle; GO:0000902 cell morphogenesis; GO:0000904 cell morphogenesis involved in differentiation; GO:0001501 skeletal system development; GO:0001775 cell activation; GO:0001906 cell killing; GO:0001909 leukocyte mediated cytotoxicity; GO:0001932 regulation of protein phosphorylation; GO:0001933 negative regulation of protein phosphorylation; GO:0002228 natural killer cell m…	GO:0005622 intracellular; GO:0005623 cell; GO:0005634 nucleus; GO:0005730 nucleolus; GO:0005737 cytoplasm; GO:0005829 cytosol; GO:0005886 plasma membrane; GO:0005911 cell-cell junction; GO:0016020 membrane; GO:0030054 cell junction; GO:0031974 membrane-enclosed lumen; GO:0031981 nuclear lumen; GO:0032991 protein-containing complex; GO:0042101 T cell receptor complex; GO:0042105 alpha-beta T cell …	GO:0001784 phosphotyrosine residue binding; GO:0003824 catalytic activity; GO:0004721 phosphoprotein phosphatase activity; GO:0004725 protein tyrosine phosphatase activity; GO:0004888 transmembrane signaling receptor activity; GO:0005001 transmembrane receptor protein tyrosine phosphatase activity; GO:0005102 signaling receptor binding; GO:0005488 binding; GO:0005515 protein binding; GO:0016787 h…	PF00017; PF00102	SH2 domain; Protein-tyrosine phosphatase	T	KOG0790	Protein tyrosine phosphatase Corkscrew and related SH2 domain enzymes
Q6ZUB1	Spermatogenesis-associated protein 31E1 OS=Homo sapiens OX=9606 GN=SPATA31E1 PE=2 SV=2	SPATA31E1	0.1716	1.5811e-05	Down	157.13	17.9	19	19	0.281204	0.294009	0.303596	1.57102	1.94344	1.60673	nucleus
P80188	Neutrophil gelatinase-associated lipocalin OS=Homo sapiens OX=9606 GN=LCN2 PE=1 SV=2	LCN2	0.1765	3.60538e-07	Down	22.588	59.6	9	9	0.284017	0.309147	0.306964	1.7016	1.69633	1.70194	extracellular	K21129	LCN2; lipocalin 2	hsa04657 IL-17 signaling pathway	GO:0000302 response to reactive oxygen species; GO:0001775 cell activation; GO:0002237 response to molecule of bacterial origin; GO:0002252 immune effector process; GO:0002263 cell activation involved in immune response; GO:0002274 myeloid leukocyte activation; GO:0002275 myeloid cell activation involved in immune response; GO:0002283 neutrophil activation involved in immune response; GO:0002366 …	GO:0005576 extracellular region; GO:0005615 extracellular space; GO:0005622 intracellular; GO:0005623 cell; GO:0005737 cytoplasm; GO:0005829 cytosol; GO:0012505 endomembrane system; GO:0030141 secretory granule; GO:0031410 cytoplasmic vesicle; GO:0031974 membrane-enclosed lumen; GO:0031982 vesicle; GO:0031983 vesicle lumen; GO:0034774 secretory granule lumen; GO:0035580 specific granule lumen; GO…	GO:0002020 protease binding; GO:0005488 binding; GO:0005506 iron ion binding; GO:0005515 protein binding; GO:0019899 enzyme binding; GO:0042802 identical protein binding; GO:0042803 protein homodimerization activity; GO:0043167 ion binding; GO:0043169 cation binding; GO:0046872 metal ion binding; GO:0046914 transition metal ion binding; GO:0046983 protein dimerization activity;	PF00061	Lipocalin / cytosolic fatty-acid binding protein family
P50552	Vasodilator-stimulated phosphoprotein OS=Homo sapiens OX=9606 GN=VASP PE=1 SV=3	VASP	0.182	0.00551201	Down	39.829	12.9	4	4	0.321695	0.300992	0.301278	0.863049	2.06955	2.14344	nucleus	K06274	VASP; vasodilator-stimulated phosphoprotein	hsa04666 Fc gamma R-mediated phagocytosis; hsa04510 Focal adhesion; hsa04670 Leukocyte transendothelial migration; hsa04015 Rap1 signaling pathway; hsa04611 Platelet activation; hsa04022 cGMP-PKG signaling pathway; hsa04530 Tight junction	GO:0000902 cell morphogenesis; GO:0000904 cell morphogenesis involved in differentiation; GO:0001838 embryonic epithelial tube formation; GO:0001841 neural tube formation; GO:0001843 neural tube closure; GO:0002009 morphogenesis of an epithelium; GO:0006928 movement of cell or subcellular component; GO:0006935 chemotaxis; GO:0006996 organelle organization; GO:0007010 cytoskeleton organization; GO…	GO:0005622 intracellular; GO:0005623 cell; GO:0005737 cytoplasm; GO:0005829 cytosol; GO:0005856 cytoskeleton; GO:0005886 plasma membrane; GO:0005912 adherens junction; GO:0005925 focal adhesion; GO:0015629 actin cytoskeleton; GO:0016020 membrane; GO:0030027 lamellipodium; GO:0030054 cell junction; GO:0030055 cell-substrate junction; GO:0030175 filopodium; GO:0031252 cell leading edge; GO:0031253 …	GO:0005488 binding; GO:0005515 protein binding; GO:0005522 profilin binding;	PF00568; PF08776	WH1 domain; VASP tetramerisation domain	Z	KOG4590	Signal transduction protein Enabled, contains WH1 domain
Q5T7R7	Uncharacterized protein C1orf185 OS=Homo sapiens OX=9606 GN=C1orf185 PE=2 SV=1	C1orf185	0.1821	0.000238199	Down	22.411	23.6	4	4	0.257704		0.283696	1.57153	1.5637	1.32337	extracellular
P04040	Catalase OS=Homo sapiens OX=9606 GN=CAT PE=1 SV=3	CAT	0.1836	2.33196e-07	Down	59.755	43.6	18	18	0.29705	0.319191	0.314652	1.66658	1.68325	1.71928	cytoplasm	K03781	katE; catalase [EC:1.11.1.6]	hsa00630 Glyoxylate and dicarboxylate metabolism; hsa04146 Peroxisome; hsa04211 Longevity regulating pathway; hsa00380 Tryptophan metabolism; hsa01200 Carbon metabolism; hsa05022 Pathways of neurodegeneration - multiple diseases; hsa05014 Amyotrophic lateral sclerosis; hsa04068 FoxO signaling pathway; hsa04213 Longevity regulating pathway - multiple species; hsa01100 Metabolic pathways	GO:0000302 response to reactive oxygen species; GO:0001101 response to acid chemical; GO:0001655 urogenital system development; GO:0001657 ureteric bud development; GO:0001666 response to hypoxia; GO:0001775 cell activation; GO:0001822 kidney development; GO:0001823 mesonephros development; GO:0002252 immune effector process; GO:0002263 cell activation involved in immune response; GO:0002274 myel…	GO:0000323 lytic vacuole; GO:0005576 extracellular region; GO:0005615 extracellular space; GO:0005622 intracellular; GO:0005623 cell; GO:0005737 cytoplasm; GO:0005739 mitochondrion; GO:0005740 mitochondrial envelope; GO:0005758 mitochondrial intermembrane space; GO:0005764 lysosome; GO:0005773 vacuole; GO:0005777 peroxisome; GO:0005778 peroxisomal membrane; GO:0005782 peroxisomal matrix; GO:00057…	GO:0000166 nucleotide binding; GO:0003824 catalytic activity; GO:0004046 aminoacylase activity; GO:0004096 catalase activity; GO:0004601 peroxidase activity; GO:0005102 signaling receptor binding; GO:0005488 binding; GO:0005515 protein binding; GO:0016209 antioxidant activity; GO:0016491 oxidoreductase activity; GO:0016627 oxidoreductase activity, acting on the CH-CH group of donors; GO:0016628 o…	PF00199	Catalase	P	KOG0047	Catalase
Q0P670	Uncharacterized protein SPEM2 OS=Homo sapiens OX=9606 GN=SPEM2 PE=2 SV=2	SPEM2	0.1846	0.00114623	Down	57.13	8.6	3	3	0.254815	0.447094	0.232923	1.58045	1.65814	1.82658	nucleus
P43897	Elongation factor Ts, mitochondrial OS=Homo sapiens OX=9606 GN=TSFM PE=1 SV=2	TSFM	0.1899	3.48455e-06	Down	35.39	28.6	6	6	0.316609	0.341003	0.299802	1.62727	1.64375	1.77156	mitochondria	K02357			GO:0006355 regulation of transcription, DNA-templated; GO:0006412 translation; GO:0006414 translational elongation; GO:0006417 regulation of translation; GO:0006518 peptide metabolic process; GO:0006807 nitrogen compound metabolic process; GO:0008152 metabolic process; GO:0009058 biosynthetic process; GO:0009059 macromolecule biosynthetic process; GO:0009889 regulation of biosynthetic process; GO…	GO:0005622 intracellular; GO:0005623 cell; GO:0005634 nucleus; GO:0005737 cytoplasm; GO:0005739 mitochondrion; GO:0005759 mitochondrial matrix; GO:0031974 membrane-enclosed lumen; GO:0043226 organelle; GO:0043227 membrane-bounded organelle; GO:0043229 intracellular organelle; GO:0043231 intracellular membrane-bounded organelle; GO:0043233 organelle lumen; GO:0070013 intracellular organelle lumen;	GO:0003676 nucleic acid binding; GO:0003723 RNA binding; GO:0003746 translation elongation factor activity; GO:0005488 binding; GO:0008135 translation factor activity, RNA binding; GO:0097159 organic cyclic compound binding; GO:1901363 heterocyclic compound binding;			J	KOG1071	Mitochondrial translation elongation factor EF-Tsmt, catalyzes nucleotide exchange on EF-Tumt
Q8NBQ5	Estradiol 17-beta-dehydrogenase 11 OS=Homo sapiens OX=9606 GN=HSD17B11 PE=1 SV=3	HSD17B11	0.1929	1.53151e-06	Down	32.935	22.3	5	5	0.321225	0.337872	0.311325	1.58959	1.68824	1.75175	endoplasmic reticulum				GO:0006629 lipid metabolic process; GO:0006694 steroid biosynthetic process; GO:0006703 estrogen biosynthetic process; GO:0006706 steroid catabolic process; GO:0006710 androgen catabolic process; GO:0008152 metabolic process; GO:0008202 steroid metabolic process; GO:0008209 androgen metabolic process; GO:0008210 estrogen metabolic process; GO:0008610 lipid biosynthetic process; GO:0009056 catabol…	GO:0005622 intracellular; GO:0005623 cell; GO:0005737 cytoplasm; GO:0005811 lipid droplet; GO:0005829 cytosol; GO:0043226 organelle; GO:0043228 non-membrane-bounded organelle; GO:0043229 intracellular organelle; GO:0043232 intracellular non-membrane-bounded organelle;	GO:0003824 catalytic activity; GO:0004303 estradiol 17-beta-dehydrogenase activity; GO:0016229 steroid dehydrogenase activity; GO:0016491 oxidoreductase activity; GO:0016614 oxidoreductase activity, acting on CH-OH group of donors; GO:0016616 oxidoreductase activity, acting on the CH-OH group of donors, NAD or NADP as acceptor; GO:0033764 steroid dehydrogenase activity, acting on the CH-OH group …	PF00106	short chain dehydrogenase	Q	KOG1201	Hydroxysteroid 17-beta dehydrogenase 11
P15086	Carboxypeptidase B OS=Homo sapiens OX=9606 GN=CPB1 PE=1 SV=4	CPB1	0.1938	5.18377e-06	Down	47.367	34.1	13	13	0.30059	0.353495	0.320063	1.62005	1.7133	1.6925	extracellular	K01291	CPB1; carboxypeptidase B [EC:3.4.17.2]	hsa04972 Pancreatic secretion; hsa04974 Protein digestion and absorption	GO:0006508 proteolysis; GO:0006807 nitrogen compound metabolic process; GO:0008152 metabolic process; GO:0019538 protein metabolic process; GO:0043170 macromolecule metabolic process; GO:0044238 primary metabolic process; GO:0071704 organic substance metabolic process; GO:1901564 organonitrogen compound metabolic process;	GO:0005576 extracellular region; GO:0005615 extracellular space;	GO:0003824 catalytic activity; GO:0004180 carboxypeptidase activity; GO:0004181 metallocarboxypeptidase activity; GO:0008233 peptidase activity; GO:0008235 metalloexopeptidase activity; GO:0008237 metallopeptidase activity; GO:0008238 exopeptidase activity; GO:0016787 hydrolase activity; GO:0070011 peptidase activity, acting on L-amino acid peptides; GO:0140096 catalytic activity, acting on a pro…	PF02244; PF00246	Carboxypeptidase activation peptide; Zinc carboxypeptidase	O	KOG2650	Zinc carboxypeptidase
O75367	Core histone macro-H2A.1 OS=Homo sapiens OX=9606 GN=MACROH2A1 PE=1 SV=4	MACROH2A1	0.194	5.38698e-09	Down	39.617	34.4	9	9	0.32362	0.328544	0.322654	1.66997	1.65768	1.69753	mitochondria	K11251	H2A; histone H2A	hsa05322 Systemic lupus erythematosus; hsa05034 Alcoholism; hsa04217 Necroptosis	GO:0000122 negative regulation of transcription by RNA polymerase II; GO:0001932 regulation of protein phosphorylation; GO:0001933 negative regulation of protein phosphorylation; GO:0006323 DNA packaging; GO:0006325 chromatin organization; GO:0006333 chromatin assembly or disassembly; GO:0006334 nucleosome assembly; GO:0006342 chromatin silencing; GO:0006355 regulation of transcription, DNA-templ…	GO:0000228 nuclear chromosome; GO:0000775 chromosome, centromeric region; GO:0000785 chromatin; GO:0000786 nucleosome; GO:0000790 nuclear chromatin; GO:0000792 heterochromatin; GO:0000803 sex chromosome; GO:0000805 X chromosome; GO:0001739 sex chromatin; GO:0001740 Barr body; GO:0005622 intracellular; GO:0005623 cell; GO:0005634 nucleus; GO:0005694 chromosome; GO:0005720 nuclear heterochromatin; …	GO:0000182 rDNA binding; GO:0000976 transcription regulatory region sequence-specific DNA binding; GO:0000977 RNA polymerase II transcription regulatory region sequence-specific DNA binding; GO:0000979 RNA polymerase II core promoter sequence-specific DNA binding; GO:0001046 core promoter sequence-specific DNA binding; GO:0001067 regulatory region nucleic acid binding; GO:0003676 nucleic acid bin…	PF00125; PF01661	Core histone H2A/H2B/H3/H4; Macro domain	B	KOG2633	Hismacro and SEC14 domain-containing proteins
Q9NWH7	Spermatogenesis-associated protein 6 OS=Homo sapiens OX=9606 GN=SPATA6 PE=1 SV=1	SPATA6	0.1949	0.00730588	Down	55.988	24.2	9	9		0.223968	0.350877	1.25081	1.9284	1.24594	cytoplasm	K23224			GO:0000003 reproduction; GO:0006996 organelle organization; GO:0007276 gamete generation; GO:0007283 spermatogenesis; GO:0009987 cellular process; GO:0016043 cellular component organization; GO:0019953 sexual reproduction; GO:0022414 reproductive process; GO:0022607 cellular component assembly; GO:0030030 cell projection organization; GO:0030031 cell projection assembly; GO:0032501 multicellular …	GO:0005623 cell; GO:0005929 cilium; GO:0031514 motile cilium; GO:0036126 sperm flagellum; GO:0042995 cell projection; GO:0043226 organelle; GO:0097224 sperm connecting piece; GO:0097729 9+2 motile cilium; GO:0120025 plasma membrane bounded cell projection;
Q99880	Histone H2B type 1-L OS=Homo sapiens OX=9606 GN=H2BC13 PE=1 SV=3	H2BC13	0.2011	3.84627e-05	Down	13.952	42.1	6	2	0.292494	0.374204	0.337945	1.77142	1.67349	1.55045	nucleus	K11252	H2B; histone H2B	hsa05322 Systemic lupus erythematosus; hsa05203 Viral carcinogenesis; hsa05034 Alcoholism	GO:0006323 DNA packaging; GO:0006325 chromatin organization; GO:0006333 chromatin assembly or disassembly; GO:0006334 nucleosome assembly; GO:0006464 cellular protein modification process; GO:0006807 nitrogen compound metabolic process; GO:0006996 organelle organization; GO:0008152 metabolic process; GO:0009987 cellular process; GO:0016043 cellular component organization; GO:0016567 protein ubiqu…	GO:0000785 chromatin; GO:0000786 nucleosome; GO:0005622 intracellular; GO:0005623 cell; GO:0005634 nucleus; GO:0005654 nucleoplasm; GO:0005694 chromosome; GO:0005737 cytoplasm; GO:0005829 cytosol; GO:0031974 membrane-enclosed lumen; GO:0031981 nuclear lumen; GO:0032991 protein-containing complex; GO:0032993 protein-DNA complex; GO:0043226 organelle; GO:0043227 membrane-bounded organelle; GO:00432…	GO:0003676 nucleic acid binding; GO:0003677 DNA binding; GO:0005488 binding; GO:0097159 organic cyclic compound binding; GO:1901363 heterocyclic compound binding;	PF00125	Core histone H2A/H2B/H3/H4	B	KOG1744	Histone H2B
Q6P4A8	Phospholipase B-like 1 OS=Homo sapiens OX=9606 GN=PLBD1 PE=1 SV=2	PLBD1	0.2085	4.63165e-06	Down	63.254	27.7	13	13	0.351728	0.315366	0.368201	1.63901	1.68044	1.64525	extracellular				GO:0006629 lipid metabolic process; GO:0006644 phospholipid metabolic process; GO:0006650 glycerophospholipid metabolic process; GO:0006793 phosphorus metabolic process; GO:0006796 phosphate-containing compound metabolic process; GO:0006807 nitrogen compound metabolic process; GO:0008152 metabolic process; GO:0009987 cellular process; GO:0019637 organophosphate metabolic process; GO:0036149 phosp…	GO:0005576 extracellular region; GO:0005615 extracellular space; GO:0005622 intracellular; GO:0005623 cell; GO:0005737 cytoplasm; GO:0005829 cytosol;	GO:0003824 catalytic activity; GO:0004620 phospholipase activity; GO:0004622 lysophospholipase activity; GO:0004623 phospholipase A2 activity; GO:0016298 lipase activity; GO:0016787 hydrolase activity; GO:0016788 hydrolase activity, acting on ester bonds; GO:0052689 carboxylic ester hydrolase activity;			G	KOG3774	Uncharacterized conserved protein Lama
O00584	Ribonuclease T2 OS=Homo sapiens OX=9606 GN=RNASET2 PE=1 SV=2	RNASET2	0.2087	1.11903e-05	Down	29.48	30.9	6	6	0.356166	0.318592	0.361211	1.69315	1.52102	1.74986	extracellular	K01166			GO:0001775 cell activation; GO:0002252 immune effector process; GO:0002263 cell activation involved in immune response; GO:0002274 myeloid leukocyte activation; GO:0002275 myeloid cell activation involved in immune response; GO:0002283 neutrophil activation involved in immune response; GO:0002366 leukocyte activation involved in immune response; GO:0002376 immune system process; GO:0002443 leukoc…	GO:0000323 lytic vacuole; GO:0005576 extracellular region; GO:0005615 extracellular space; GO:0005622 intracellular; GO:0005623 cell; GO:0005737 cytoplasm; GO:0005764 lysosome; GO:0005766 primary lysosome; GO:0005773 vacuole; GO:0005775 vacuolar lumen; GO:0005783 endoplasmic reticulum; GO:0005788 endoplasmic reticulum lumen; GO:0012505 endomembrane system; GO:0030141 secretory granule; GO:0031410…	GO:0003824 catalytic activity; GO:0004518 nuclease activity; GO:0004540 ribonuclease activity; GO:0016787 hydrolase activity; GO:0016788 hydrolase activity, acting on ester bonds; GO:0140098 catalytic activity, acting on RNA;	PF00445	Ribonuclease T2 family	A	KOG1642	Ribonuclease, T2 family
P07320	Gamma-crystallin D OS=Homo sapiens OX=9606 GN=CRYGD PE=1 SV=3	CRYGD	0.2133	0.00063111	Down	20.738	14.9	2	2	0.391338	0.413889	0.249741	1.57221	1.67519	1.69763	cytoplasm,nucleus	K23483			GO:0000302 response to reactive oxygen species; GO:0001654 eye development; GO:0002088 lens development in camera-type eye; GO:0003008 system process; GO:0006950 response to stress; GO:0006979 response to oxidative stress; GO:0007275 multicellular organism development; GO:0007423 sensory organ development; GO:0007600 sensory perception; GO:0007601 visual perception; GO:0009888 tissue development;…	GO:0005622 intracellular; GO:0005623 cell; GO:0005634 nucleus; GO:0005737 cytoplasm; GO:0043226 organelle; GO:0043227 membrane-bounded organelle; GO:0043229 intracellular organelle; GO:0043231 intracellular membrane-bounded organelle;	GO:0005198 structural molecule activity; GO:0005212 structural constituent of eye lens;	PF00030	Beta/Gamma crystallin
Q14990	Outer dense fiber protein 1 OS=Homo sapiens OX=9606 GN=ODF1 PE=1 SV=2	ODF1	0.2212	1.61494e-06	Down	28.366	40.8	9	9	0.374048	0.33865	0.374147	1.6645	1.61278	1.63588	extracellular					GO:0001520 outer dense fiber; GO:0005622 intracellular; GO:0005623 cell; GO:0005856 cytoskeleton; GO:0005929 cilium; GO:0031514 motile cilium; GO:0036126 sperm flagellum; GO:0042995 cell projection; GO:0043226 organelle; GO:0043228 non-membrane-bounded organelle; GO:0043229 intracellular organelle; GO:0043232 intracellular non-membrane-bounded organelle; GO:0097729 9+2 motile cilium; GO:0099080 s…	GO:0005488 binding; GO:0005515 protein binding; GO:0019904 protein domain specific binding;
P43405	Tyrosine-protein kinase SYK OS=Homo sapiens OX=9606 GN=SYK PE=1 SV=1	SYK	0.2277	0.000231118	Down	72.065	12.8	6	6	0.335286	0.408767	0.368866	1.79041	1.31421	1.78246	cytoplasm	K05855	SYK; spleen tyrosine kinase [EC:2.7.10.2]	hsa04666 Fc gamma R-mediated phagocytosis; hsa04380 Osteoclast differentiation; hsa05203 Viral carcinogenesis; hsa04650 Natural killer cell mediated cytotoxicity; hsa05169 Epstein-Barr virus infection; hsa05168 Herpes simplex virus 1 infection; hsa04625 C-type lectin receptor signaling pathway; hsa05171 Coronavirus disease - COVID-19; hsa04072 Phospholipase D signaling pathway; hsa05152 Tuberculo…	GO:0000165 MAPK cascade; GO:0000187 activation of MAPK activity; GO:0001568 blood vessel development; GO:0001775 cell activation; GO:0001817 regulation of cytokine production; GO:0001819 positive regulation of cytokine production; GO:0001820 serotonin secretion; GO:0001932 regulation of protein phosphorylation; GO:0001934 positive regulation of protein phosphorylation; GO:0001944 vasculature deve…	GO:0005622 intracellular; GO:0005623 cell; GO:0005634 nucleus; GO:0005737 cytoplasm; GO:0005829 cytosol; GO:0005886 plasma membrane; GO:0009898 cytoplasmic side of plasma membrane; GO:0016020 membrane; GO:0019814 immunoglobulin complex; GO:0019815 B cell receptor complex; GO:0019897 extrinsic component of plasma membrane; GO:0019898 extrinsic component of membrane; GO:0030139 endocytic vesicle; G…	GO:0000166 nucleotide binding; GO:0001784 phosphotyrosine residue binding; GO:0003824 catalytic activity; GO:0004672 protein kinase activity; GO:0004674 protein serine/threonine kinase activity; GO:0004713 protein tyrosine kinase activity; GO:0004715 non-membrane spanning protein tyrosine kinase activity; GO:0005102 signaling receptor binding; GO:0005178 integrin binding; GO:0005488 binding; GO:0…	PF00017; PF07714	SH2 domain; Protein tyrosine kinase
Q9Y305	Acyl-coenzyme A thioesterase 9, mitochondrial OS=Homo sapiens OX=9606 GN=ACOT9 PE=1 SV=2	ACOT9	0.228	0.00246031	Down	49.901	17.8	6	6	0.308642	0.345068	0.460242	1.10427	1.84893	1.93285	mitochondria	K17361			GO:0006139 nucleobase-containing compound metabolic process; GO:0006163 purine nucleotide metabolic process; GO:0006637 acyl-CoA metabolic process; GO:0006725 cellular aromatic compound metabolic process; GO:0006732 coenzyme metabolic process; GO:0006753 nucleoside phosphate metabolic process; GO:0006790 sulfur compound metabolic process; GO:0006793 phosphorus metabolic process; GO:0006796 phosph…	GO:0005622 intracellular; GO:0005623 cell; GO:0005737 cytoplasm; GO:0005739 mitochondrion; GO:0005759 mitochondrial matrix; GO:0031974 membrane-enclosed lumen; GO:0043226 organelle; GO:0043227 membrane-bounded organelle; GO:0043229 intracellular organelle; GO:0043231 intracellular membrane-bounded organelle; GO:0043233 organelle lumen; GO:0070013 intracellular organelle lumen;	GO:0003824 catalytic activity; GO:0003986 acetyl-CoA hydrolase activity; GO:0016289 CoA hydrolase activity; GO:0016787 hydrolase activity; GO:0016788 hydrolase activity, acting on ester bonds; GO:0016790 thiolester hydrolase activity; GO:0047617 acyl-CoA hydrolase activity;			I	KOG2763	Acyl-CoA thioesterase
Q8WV93	AFG1-like ATPase OS=Homo sapiens OX=9606 GN=AFG1L PE=1 SV=2	AFG1L	0.2289	0.00169294	Down	54.844	18.3	6	6		0.322918	0.339184	1.3091	1.2699	1.7589	mitochondria	K18798			GO:0006091 generation of precursor metabolites and energy; GO:0006119 oxidative phosphorylation; GO:0006123 mitochondrial electron transport, cytochrome c to oxygen; GO:0006139 nucleobase-containing compound metabolic process; GO:0006163 purine nucleotide metabolic process; GO:0006725 cellular aromatic compound metabolic process; GO:0006753 nucleoside phosphate metabolic process; GO:0006793 phosp…	GO:0005622 intracellular; GO:0005623 cell; GO:0005737 cytoplasm; GO:0005739 mitochondrion; GO:0005740 mitochondrial envelope; GO:0016020 membrane; GO:0031090 organelle membrane; GO:0031966 mitochondrial membrane; GO:0031967 organelle envelope; GO:0031975 envelope; GO:0043226 organelle; GO:0043227 membrane-bounded organelle; GO:0043229 intracellular organelle; GO:0043231 intracellular membrane-bou…				S	KOG2383	Predicted ATPase
Q13423	NAD(P) transhydrogenase, mitochondrial OS=Homo sapiens OX=9606 GN=NNT PE=1 SV=3	NNT	0.23	6.36086e-06	Down	113.89	16.9	14	14	0.390278	0.361579	0.370006	1.56409	1.7632	1.55085	plasma membrane	K00323	NNT; H+-translocating NAD(P) transhydrogenase [EC:1.6.1.2 7.1.1.1]	hsa00760 Nicotinate and nicotinamide metabolism; hsa01100 Metabolic pathways	GO:0006082 organic acid metabolic process; GO:0006091 generation of precursor metabolites and energy; GO:0006099 tricarboxylic acid cycle; GO:0006101 citrate metabolic process; GO:0006139 nucleobase-containing compound metabolic process; GO:0006725 cellular aromatic compound metabolic process; GO:0006732 coenzyme metabolic process; GO:0006733 oxidoreduction coenzyme metabolic process; GO:0006739 …	GO:0005622 intracellular; GO:0005623 cell; GO:0005737 cytoplasm; GO:0005739 mitochondrion; GO:0005740 mitochondrial envelope; GO:0005743 mitochondrial inner membrane; GO:0005746 mitochondrial respirasome; GO:0016020 membrane; GO:0019866 organelle inner membrane; GO:0031090 organelle membrane; GO:0031966 mitochondrial membrane; GO:0031967 organelle envelope; GO:0031975 envelope; GO:0043226 organel…	GO:0000166 nucleotide binding; GO:0003824 catalytic activity; GO:0003957 NAD(P)+ transhydrogenase (B-specific) activity; GO:0005215 transporter activity; GO:0005488 binding; GO:0008324 cation transmembrane transporter activity; GO:0008746 NAD(P)+ transhydrogenase activity; GO:0008750 NAD(P)+ transhydrogenase (AB-specific) activity; GO:0015075 ion transmembrane transporter activity; GO:0015077 mon…	PF05222; PF01262	Alanine dehydrogenase/PNT, N-terminal domain; Alanine dehydrogenase/PNT, C-terminal domain
Q68DN1	Uncharacterized protein C2orf16 OS=Homo sapiens OX=9606 GN=C2orf16 PE=2 SV=3	C2orf16	0.2301	9.61122e-09	Down	224.32	20.7	30	30	0.379907	0.369897	0.372519	1.63749	1.62893	1.61126	nucleus
P27695	DNA-(apurinic or apyrimidinic site) endonuclease OS=Homo sapiens OX=9606 GN=APEX1 PE=1 SV=2	APEX1	0.2303	0.00318756	Down	35.554	36.5	8	8	0.227109	0.450721	0.445333	1.86464	1.44952	1.56268	nucleus	K10771	APEX1; AP endonuclease 1 [EC:4.2.99.18]	hsa03410 Base excision repair	GO:0000302 response to reactive oxygen species; GO:0000723 telomere maintenance; GO:0006139 nucleobase-containing compound metabolic process; GO:0006259 DNA metabolic process; GO:0006281 DNA repair; GO:0006284 base-excision repair; GO:0006286 base-excision repair, base-free sugar-phosphate removal; GO:0006304 DNA modification; GO:0006725 cellular aromatic compound metabolic process; GO:0006793 ph…	GO:0000228 nuclear chromosome; GO:0000781 chromosome, telomeric region; GO:0000784 nuclear chromosome, telomeric region; GO:0005622 intracellular; GO:0005623 cell; GO:0005634 nucleus; GO:0005654 nucleoplasm; GO:0005667 transcription regulator complex; GO:0005694 chromosome; GO:0005730 nucleolus; GO:0005737 cytoplasm; GO:0005739 mitochondrion; GO:0005783 endoplasmic reticulum; GO:0005813 centrosom…	GO:0003676 nucleic acid binding; GO:0003677 DNA binding; GO:0003682 chromatin binding; GO:0003684 damaged DNA binding; GO:0003690 double-stranded DNA binding; GO:0003691 double-stranded telomeric DNA binding; GO:0003712 transcription coregulator activity; GO:0003713 transcription coactivator activity; GO:0003714 transcription corepressor activity; GO:0003824 catalytic activity; GO:0003906 DNA-(ap…	PF03372	Endonuclease/Exonuclease/phosphatase family	B	KOG1294	Apurinic/apyrimidinic endonuclease and related enzymes
Q96M20	Cyclic nucleotide-binding domain-containing protein 2 OS=Homo sapiens OX=9606 GN=CNBD2 PE=2 SV=2	CNBD2	0.2347	0.000923411	Down	67.511	13.4	6	6	0.332722	0.308433	0.499403	1.72191	1.38991	1.74762	mitochondria							PF00027	Cyclic nucleotide-binding domain	T	KOG1113	cAMP-dependent protein kinase types I and II, regulatory subunit
P06737	Glycogen phosphorylase, liver form OS=Homo sapiens OX=9606 GN=PYGL PE=1 SV=4	PYGL	0.2351	1.03881e-06	Down	97.147	39.9	28	24	0.364793	0.379762	0.397383	1.56747	1.64953	1.64106	cytoplasm	K00688	PYG; glycogen phosphorylase [EC:2.4.1.1]	hsa00500 Starch and sucrose metabolism; hsa04922 Glucagon signaling pathway; hsa04910 Insulin signaling pathway; hsa04217 Necroptosis; hsa04931 Insulin resistance; hsa01100 Metabolic pathways	GO:0000272 polysaccharide catabolic process; GO:0001775 cell activation; GO:0002252 immune effector process; GO:0002263 cell activation involved in immune response; GO:0002274 myeloid leukocyte activation; GO:0002275 myeloid cell activation involved in immune response; GO:0002283 neutrophil activation involved in immune response; GO:0002366 leukocyte activation involved in immune response; GO:000…	GO:0005576 extracellular region; GO:0005622 intracellular; GO:0005623 cell; GO:0005737 cytoplasm; GO:0005829 cytosol; GO:0012505 endomembrane system; GO:0030141 secretory granule; GO:0031410 cytoplasmic vesicle; GO:0031974 membrane-enclosed lumen; GO:0031982 vesicle; GO:0031983 vesicle lumen; GO:0034774 secretory granule lumen; GO:0043226 organelle; GO:0043227 membrane-bounded organelle; GO:00432…	GO:0000166 nucleotide binding; GO:0002054 nucleobase binding; GO:0002060 purine nucleobase binding; GO:0003824 catalytic activity; GO:0004645 1,4-alpha-oligoglucan phosphorylase activity; GO:0005488 binding; GO:0005515 protein binding; GO:0005524 ATP binding; GO:0005536 glucose binding; GO:0008144 drug binding; GO:0008184 glycogen phosphorylase activity; GO:0016208 AMP binding; GO:0016740 transfe…			G	KOG2099	Glycogen phosphorylase
P20292	Arachidonate 5-lipoxygenase-activating protein OS=Homo sapiens OX=9606 GN=ALOX5AP PE=1 SV=2	ALOX5AP	0.2372	0.0371024	Down	18.157	20.5	3	3	0.321812	0.360785		0.986706	2.34851	0.982189	plasma membrane	K20735	ALOX5AP; arachidonate 5-lipoxygenase-activating protein	hsa04664 Fc epsilon RI signaling pathway	GO:0002532 production of molecular mediator involved in inflammatory response; GO:0002538 arachidonic acid metabolite production involved in inflammatory response; GO:0002540 leukotriene production involved in inflammatory response; GO:0002673 regulation of acute inflammatory response; GO:0002675 positive regulation of acute inflammatory response; GO:0006082 organic acid metabolic process; GO:000…	GO:0005622 intracellular; GO:0005623 cell; GO:0005634 nucleus; GO:0005635 nuclear envelope; GO:0005737 cytoplasm; GO:0005783 endoplasmic reticulum; GO:0005789 endoplasmic reticulum membrane; GO:0005829 cytosol; GO:0012505 endomembrane system; GO:0016020 membrane; GO:0031090 organelle membrane; GO:0031965 nuclear membrane; GO:0031967 organelle envelope; GO:0031975 envelope; GO:0031984 organelle su…	GO:0005488 binding; GO:0005504 fatty acid binding; GO:0005515 protein binding; GO:0008289 lipid binding; GO:0019899 enzyme binding; GO:0031406 carboxylic acid binding; GO:0033293 monocarboxylic acid binding; GO:0036041 long-chain fatty acid binding; GO:0036094 small molecule binding; GO:0042802 identical protein binding; GO:0042803 protein homodimerization activity; GO:0043167 ion binding; GO:004…
P0DKV0	Putative spermatogenesis-associated protein 31C1 OS=Homo sapiens OX=9606 GN=SPATA31C1 PE=5 SV=1	SPATA31C1	0.2377	0.000384172	Down	130.52	21	16	13	0.42361	0.434517	0.293985	1.67405	1.49848	1.67536	cytoplasm
P01876	Immunoglobulin heavy constant alpha 1 OS=Homo sapiens OX=9606 GN=IGHA1 PE=1 SV=2	IGHA1	0.2385	3.96185e-06	Down	37.654	52.4	12	8	0.374929	0.413531	0.366844	1.66444	1.61575	1.56451	extracellular							PF07654	Immunoglobulin C1-set domain
P09488	Glutathione S-transferase Mu 1 OS=Homo sapiens OX=9606 GN=GSTM1 PE=1 SV=3	GSTM1	0.2391	5.39302e-05	Down	25.712	32.1	6	1	0.342446	0.3451		1.37464	1.52874	1.40908	cytoplasm	K00799	GST; glutathione S-transferase [EC:2.5.1.18]	hsa00480 Glutathione metabolism; hsa05200 Pathways in cancer [Cancer network viewer]; hsa00982 Drug metabolism - cytochrome P450; hsa05418 Fluid shear stress and atherosclerosis; hsa05225 Hepatocellular carcinoma; hsa00983 Drug metabolism - other enzymes; hsa01524 Platinum drug resistance; hsa00980 Metabolism of xenobiotics by cytochrome P450; hsa05204 Chemical carcinogenesis; hsa01100 Metabolic …	GO:0006518 peptide metabolic process; GO:0006575 cellular modified amino acid metabolic process; GO:0006725 cellular aromatic compound metabolic process; GO:0006749 glutathione metabolic process; GO:0006790 sulfur compound metabolic process; GO:0006805 xenobiotic metabolic process; GO:0006807 nitrogen compound metabolic process; GO:0006950 response to stress; GO:0007568 aging; GO:0008152 metaboli…	GO:0005576 extracellular region; GO:0005622 intracellular; GO:0005623 cell; GO:0005737 cytoplasm; GO:0005829 cytosol; GO:0005886 plasma membrane; GO:0016020 membrane; GO:0032991 protein-containing complex; GO:0045171 intercellular bridge; GO:0071944 cell periphery;	GO:0003824 catalytic activity; GO:0004364 glutathione transferase activity; GO:0005488 binding; GO:0005515 protein binding; GO:0016740 transferase activity; GO:0016765 transferase activity, transferring alkyl or aryl (other than methyl) groups; GO:0019899 enzyme binding; GO:0033218 amide binding; GO:0042277 peptide binding; GO:0042802 identical protein binding; GO:0042803 protein homodimerization…	PF02798	Glutathione S-transferase, N-terminal domain	O	KOG1695	Glutathione S-transferase
Q6PEW0	Inactive serine protease 54 OS=Homo sapiens OX=9606 GN=PRSS54 PE=2 SV=3	PRSS54	0.2399	5.98419e-06	Down	43.832	34.2	8	8	0.402053	0.354178	0.404859	1.62709	1.63849	1.57333	plasma membrane							PF00089	Trypsin	O	KOG3627	Trypsin
P15153	Ras-related C3 botulinum toxin substrate 2 OS=Homo sapiens OX=9606 GN=RAC2 PE=1 SV=1	RAC2	0.2418	0.000635039	Down	21.429	43.2	7	3	0.501257	0.330233	0.336837	1.75478	1.436	1.64089	cytoplasm	K07860	RAC2; Ras-related C3 botulinum toxin substrate 2	hsa04666 Fc gamma R-mediated phagocytosis; hsa04510 Focal adhesion; hsa04014 Ras signaling pathway; hsa05200 Pathways in cancer [Cancer network viewer]; hsa04360 Axon guidance; hsa05170 Human immunodeficiency virus 1 infection; hsa04650 Natural killer cell mediated cytotoxicity; hsa05418 Fluid shear stress and atherosclerosis; hsa04310 Wnt signaling pathway; hsa05416 Viral myocarditis; hsa04670 L…	GO:0001894 tissue homeostasis; GO:0001932 regulation of protein phosphorylation; GO:0002682 regulation of immune system process; GO:0002684 positive regulation of immune system process; GO:0002685 regulation of leukocyte migration; GO:0002687 positive regulation of leukocyte migration; GO:0002688 regulation of leukocyte chemotaxis; GO:0002690 positive regulation of leukocyte chemotaxis; GO:000269…	GO:0005622 intracellular; GO:0005623 cell; GO:0005634 nucleus; GO:0005635 nuclear envelope; GO:0005737 cytoplasm; GO:0005829 cytosol; GO:0005886 plasma membrane; GO:0012505 endomembrane system; GO:0012506 vesicle membrane; GO:0016020 membrane; GO:0030027 lamellipodium; GO:0030139 endocytic vesicle; GO:0030659 cytoplasmic vesicle membrane; GO:0030666 endocytic vesicle membrane; GO:0030670 phagocyt…	GO:0000166 nucleotide binding; GO:0001882 nucleoside binding; GO:0001883 purine nucleoside binding; GO:0003824 catalytic activity; GO:0003924 GTPase activity; GO:0005488 binding; GO:0005525 GTP binding; GO:0016462 pyrophosphatase activity; GO:0016787 hydrolase activity; GO:0016817 hydrolase activity, acting on acid anhydrides; GO:0016818 hydrolase activity, acting on acid anhydrides, in phosphoru…	PF00071	Ras family	U	KOG0393	Ras-related small GTPase, Rho type
P49788	Retinoic acid receptor responder protein 1 OS=Homo sapiens OX=9606 GN=RARRES1 PE=1 SV=2	RARRES1	0.2434	2.07073e-06	Down	33.285	29.9	9	9	0.403972	0.368706	0.401816	1.55686	1.65199	1.61665	extracellular	K23595			GO:0008285 negative regulation of cell population proliferation; GO:0042127 regulation of cell population proliferation; GO:0048519 negative regulation of biological process; GO:0048523 negative regulation of cellular process; GO:0050789 regulation of biological process; GO:0050794 regulation of cellular process; GO:0065007 biological regulation;	GO:0016020 membrane; GO:0016021 integral component of membrane; GO:0031224 intrinsic component of membrane;
Q149M9	NACHT domain- and WD repeat-containing protein 1 OS=Homo sapiens OX=9606 GN=NWD1 PE=1 SV=3	NWD1	0.245	0.00021869	Down	174.55	7.4	9	9	0.413828	0.451208	0.315756	1.5987	1.53119	1.68932	mitochondria				GO:0006139 nucleobase-containing compound metabolic process; GO:0006396 RNA processing; GO:0006725 cellular aromatic compound metabolic process; GO:0006807 nitrogen compound metabolic process; GO:0008152 metabolic process; GO:0008380 RNA splicing; GO:0009987 cellular process; GO:0010467 gene expression; GO:0016070 RNA metabolic process; GO:0034641 cellular nitrogen compound metabolic process; GO:…	GO:0005622 intracellular; GO:0005623 cell; GO:0005634 nucleus; GO:0005681 spliceosomal complex; GO:0005682 U5 snRNP; GO:0030532 small nuclear ribonucleoprotein complex; GO:0032991 protein-containing complex; GO:0043226 organelle; GO:0043227 membrane-bounded organelle; GO:0043229 intracellular organelle; GO:0043231 intracellular membrane-bounded organelle; GO:0071011 precatalytic spliceosome; GO:0…	GO:0003676 nucleic acid binding; GO:0003723 RNA binding; GO:0005488 binding; GO:0097159 organic cyclic compound binding; GO:1901363 heterocyclic compound binding;	PF05729	NACHT domain	S	KOG3602	WD40 repeat-containing protein
Q6ZQQ2	Spermatogenesis-associated protein 31D1 OS=Homo sapiens OX=9606 GN=SPATA31D1 PE=2 SV=1	SPATA31D1	0.2467	2.62256e-05	Down	175.62	13.9	15	11	0.442284	0.359042	0.385869	1.60878	1.54629	1.65773	plasma membrane
Q9BRF8	Serine/threonine-protein phosphatase CPPED1 OS=Homo sapiens OX=9606 GN=CPPED1 PE=1 SV=3	CPPED1	0.2502	1.33801e-05	Down	35.548	36.6	8	8	0.439554	0.364991	0.396242	1.59766	1.60044	1.60111	cytoplasm	K21814			GO:0001775 cell activation; GO:0002252 immune effector process; GO:0002263 cell activation involved in immune response; GO:0002274 myeloid leukocyte activation; GO:0002275 myeloid cell activation involved in immune response; GO:0002283 neutrophil activation involved in immune response; GO:0002366 leukocyte activation involved in immune response; GO:0002376 immune system process; GO:0002443 leukoc…	GO:0000323 lytic vacuole; GO:0005576 extracellular region; GO:0005622 intracellular; GO:0005623 cell; GO:0005737 cytoplasm; GO:0005764 lysosome; GO:0005766 primary lysosome; GO:0005773 vacuole; GO:0005775 vacuolar lumen; GO:0005829 cytosol; GO:0005886 plasma membrane; GO:0012505 endomembrane system; GO:0016020 membrane; GO:0030141 secretory granule; GO:0031410 cytoplasmic vesicle; GO:0031974 memb…		PF00149	Calcineurin-like phosphoesterase	G	KOG1378	Purple acid phosphatase
A6NEN9	Uncharacterized protein CXorf65 OS=Homo sapiens OX=9606 GN=CXorf65 PE=4 SV=1	CXorf65	0.2506	0.00609564	Down	21.305	16.9	3	3	0.368773	0.38144	0.451985	0.93077	1.96262	1.90441	extracellular
Q5H913	ADP-ribosylation factor-like protein 13A OS=Homo sapiens OX=9606 GN=ARL13A PE=2 SV=2	ARL13A	0.2514	5.87755e-06	Down	33.003	17.6	5	5	0.392908	0.413338	0.399198	1.48824	1.7141	1.59221	extracellular	K07961						PF00025	ADP-ribosylation factor family	UZ	KOG0073	GTP-binding ADP-ribosylation factor-like protein ARL2
P34059	N-acetylgalactosamine-6-sulfatase OS=Homo sapiens OX=9606 GN=GALNS PE=1 SV=1	GALNS	0.2534	0.00160748	Down	58.025	7.1	3	3	0.368062		0.354413	1.59693	1.50959	1.17101	extracellular	K01132	GALNS; N-acetylgalactosamine-6-sulfatase [EC:3.1.6.4]	hsa00531 Glycosaminoglycan degradation; hsa04142 Lysosome; hsa01100 Metabolic pathways	GO:0001775 cell activation; GO:0002252 immune effector process; GO:0002263 cell activation involved in immune response; GO:0002274 myeloid leukocyte activation; GO:0002275 myeloid cell activation involved in immune response; GO:0002283 neutrophil activation involved in immune response; GO:0002366 leukocyte activation involved in immune response; GO:0002376 immune system process; GO:0002443 leukoc…	GO:0000323 lytic vacuole; GO:0005576 extracellular region; GO:0005622 intracellular; GO:0005623 cell; GO:0005737 cytoplasm; GO:0005764 lysosome; GO:0005766 primary lysosome; GO:0005773 vacuole; GO:0005775 vacuolar lumen; GO:0012505 endomembrane system; GO:0030141 secretory granule; GO:0031410 cytoplasmic vesicle; GO:0031974 membrane-enclosed lumen; GO:0031982 vesicle; GO:0031983 vesicle lumen; GO…	GO:0003824 catalytic activity; GO:0003943 N-acetylgalactosamine-4-sulfatase activity; GO:0008484 sulfuric ester hydrolase activity; GO:0016787 hydrolase activity; GO:0016788 hydrolase activity, acting on ester bonds; GO:0043890 N-acetylgalactosamine-6-sulfatase activity;			P	KOG3867	Sulfatase
P21953	2-oxoisovalerate dehydrogenase subunit beta, mitochondrial OS=Homo sapiens OX=9606 GN=BCKDHB PE=1 SV=2	BCKDHB	0.2536	1.27359e-05	Down	43.122	22.4	7	7	0.442377	0.386162	0.385223	1.53896	1.57032	1.67696	extracellular	K00167	BCKDHB; 2-oxoisovalerate dehydrogenase E1 component beta subunit [EC:1.2.4.4]	hsa00640 Propanoate metabolism; hsa00280 Valine, leucine and isoleucine degradation; hsa01100 Metabolic pathways	GO:0006082 organic acid metabolic process; GO:0006520 cellular amino acid metabolic process; GO:0006807 nitrogen compound metabolic process; GO:0007584 response to nutrient; GO:0008152 metabolic process; GO:0009056 catabolic process; GO:0009063 cellular amino acid catabolic process; GO:0009081 branched-chain amino acid metabolic process; GO:0009083 branched-chain amino acid catabolic process; GO:…	GO:0005622 intracellular; GO:0005623 cell; GO:0005737 cytoplasm; GO:0005739 mitochondrion; GO:0005740 mitochondrial envelope; GO:0005743 mitochondrial inner membrane; GO:0005759 mitochondrial matrix; GO:0005947 mitochondrial alpha-ketoglutarate dehydrogenase complex; GO:0016020 membrane; GO:0019866 organelle inner membrane; GO:0030062 mitochondrial tricarboxylic acid cycle enzyme complex; GO:0031…	GO:0003824 catalytic activity; GO:0003826 alpha-ketoacid dehydrogenase activity; GO:0003863 3-methyl-2-oxobutanoate dehydrogenase (2-methylpropanoyl-transferring) activity; GO:0005488 binding; GO:0016491 oxidoreductase activity; GO:0016624 oxidoreductase activity, acting on the aldehyde or oxo group of donors, disulfide as acceptor; GO:0016903 oxidoreductase activity, acting on the aldehyde or ox…	PF02779; PF02780	Transketolase, pyrimidine binding domain; Transketolase, C-terminal domain	C	KOG0525	Branched chain alpha-keto acid dehydrogenase E1, beta subunit
Q7L3T8	Probable proline--tRNA ligase, mitochondrial OS=Homo sapiens OX=9606 GN=PARS2 PE=1 SV=1	PARS2	0.2537	3.46537e-05	Down	53.262	26.5	8	8	0.439732	0.35275	0.421758	1.59217	1.58544	1.60814	mitochondria	K01881	PARS; prolyl-tRNA synthetase [EC:6.1.1.15]	hsa00970 Aminoacyl-tRNA biosynthesis				PF00587; PF03129	tRNA synthetase class II core domain (G, H, P, S and T); Anticodon binding domain	J	KOG2324	Prolyl-tRNA synthetase
P84095	Rho-related GTP-binding protein RhoG OS=Homo sapiens OX=9606 GN=RHOG PE=1 SV=1	RHOG	0.2539	2.10583e-05	Down	21.308	50.8	6	5	0.404002	0.442775	0.36821	1.61141	1.51469	1.65891	cytoplasm	K07863	RHOG; Ras homolog gene family, member G	hsa05100 Bacterial invasion of epithelial cells; hsa05132 Salmonella infection; hsa05135 Yersinia infection	GO:0001775 cell activation; GO:0002252 immune effector process; GO:0002263 cell activation involved in immune response; GO:0002274 myeloid leukocyte activation; GO:0002275 myeloid cell activation involved in immune response; GO:0002283 neutrophil activation involved in immune response; GO:0002366 leukocyte activation involved in immune response; GO:0002376 immune system process; GO:0002443 leukoc…	GO:0005622 intracellular; GO:0005623 cell; GO:0005737 cytoplasm; GO:0005783 endoplasmic reticulum; GO:0005789 endoplasmic reticulum membrane; GO:0005829 cytosol; GO:0005886 plasma membrane; GO:0012505 endomembrane system; GO:0012506 vesicle membrane; GO:0016020 membrane; GO:0030141 secretory granule; GO:0030659 cytoplasmic vesicle membrane; GO:0030667 secretory granule membrane; GO:0031090 organe…	GO:0003824 catalytic activity; GO:0003924 GTPase activity; GO:0016462 pyrophosphatase activity; GO:0016787 hydrolase activity; GO:0016817 hydrolase activity, acting on acid anhydrides; GO:0016818 hydrolase activity, acting on acid anhydrides, in phosphorus-containing anhydrides; GO:0017111 nucleoside-triphosphatase activity;	PF00071	Ras family	U	KOG0393	Ras-related small GTPase, Rho type
Q96G03	Phosphoglucomutase-2 OS=Homo sapiens OX=9606 GN=PGM2 PE=1 SV=4	PGM2	0.2559	5.43051e-05	Down	68.283	24.3	11	11	0.455491	0.389148	0.377891	1.44428	1.65515	1.67804	nucleus	K15779	PGM2; phosphoglucomutase / phosphopentomutase [EC:5.4.2.2 5.4.2.7]	hsa00500 Starch and sucrose metabolism; hsa00052 Galactose metabolism; hsa00010 Glycolysis / Gluconeogenesis; hsa00030 Pentose phosphate pathway; hsa00520 Amino sugar and nucleotide sugar metabolism; hsa00230 Purine metabolism; hsa01100 Metabolic pathways	GO:0000271 polysaccharide biosynthetic process; GO:0000272 polysaccharide catabolic process; GO:0001775 cell activation; GO:0002252 immune effector process; GO:0002263 cell activation involved in immune response; GO:0002274 myeloid leukocyte activation; GO:0002275 myeloid cell activation involved in immune response; GO:0002283 neutrophil activation involved in immune response; GO:0002366 leukocyt…	GO:0005576 extracellular region; GO:0005622 intracellular; GO:0005623 cell; GO:0005737 cytoplasm; GO:0005829 cytosol; GO:0012505 endomembrane system; GO:0030141 secretory granule; GO:0031410 cytoplasmic vesicle; GO:0031974 membrane-enclosed lumen; GO:0031982 vesicle; GO:0031983 vesicle lumen; GO:0034774 secretory granule lumen; GO:0043226 organelle; GO:0043227 membrane-bounded organelle; GO:00432…	GO:0003824 catalytic activity; GO:0004614 phosphoglucomutase activity; GO:0008973 phosphopentomutase activity; GO:0016853 isomerase activity; GO:0016866 intramolecular transferase activity; GO:0016868 intramolecular transferase activity, phosphotransferases;	PF02878; PF02879; PF02880	Phosphoglucomutase/phosphomannomutase, alpha/beta/alpha domain I; Phosphoglucomutase/phosphomannomutase, alpha/beta/alpha domain II; Phosphoglucomutase/phosphomannomutase, alpha/beta/alpha domain III	G	KOG1220	Phosphoglucomutase/phosphomannomutase
Q9NP81	Serine--tRNA ligase, mitochondrial OS=Homo sapiens OX=9606 GN=SARS2 PE=1 SV=1	SARS2	0.2569	0.00146787	Down	58.282	19.7	7	7	0.561337	0.345723	0.319372	1.65787	1.50417	1.61153	mitochondria	K01875	SARS; seryl-tRNA synthetase [EC:6.1.1.11]	hsa00970 Aminoacyl-tRNA biosynthesis	GO:0006082 organic acid metabolic process; GO:0006139 nucleobase-containing compound metabolic process; GO:0006399 tRNA metabolic process; GO:0006412 translation; GO:0006418 tRNA aminoacylation for protein translation; GO:0006434 seryl-tRNA aminoacylation; GO:0006518 peptide metabolic process; GO:0006520 cellular amino acid metabolic process; GO:0006725 cellular aromatic compound metabolic proces…	GO:0005622 intracellular; GO:0005623 cell; GO:0005737 cytoplasm; GO:0005739 mitochondrion; GO:0043226 organelle; GO:0043227 membrane-bounded organelle; GO:0043229 intracellular organelle; GO:0043231 intracellular membrane-bounded organelle;	GO:0000166 nucleotide binding; GO:0003824 catalytic activity; GO:0004812 aminoacyl-tRNA ligase activity; GO:0004828 serine-tRNA ligase activity; GO:0005488 binding; GO:0005524 ATP binding; GO:0008144 drug binding; GO:0016874 ligase activity; GO:0016875 ligase activity, forming carbon-oxygen bonds; GO:0017076 purine nucleotide binding; GO:0030554 adenyl nucleotide binding; GO:0032553 ribonucleotid…	PF00587	tRNA synthetase class II core domain (G, H, P, S and T)	J	KOG2509	Seryl-tRNA synthetase
P28676	Grancalcin OS=Homo sapiens OX=9606 GN=GCA PE=1 SV=2	GCA	0.2657	4.21521e-06	Down	24.01	32.3	6	6	0.390805	0.441577	0.427281	1.61373	1.57936	1.54726	cytoplasm	K23923			GO:0001775 cell activation; GO:0002252 immune effector process; GO:0002263 cell activation involved in immune response; GO:0002274 myeloid leukocyte activation; GO:0002275 myeloid cell activation involved in immune response; GO:0002283 neutrophil activation involved in immune response; GO:0002366 leukocyte activation involved in immune response; GO:0002376 immune system process; GO:0002443 leukoc…	GO:0000323 lytic vacuole; GO:0005576 extracellular region; GO:0005622 intracellular; GO:0005623 cell; GO:0005737 cytoplasm; GO:0005764 lysosome; GO:0005766 primary lysosome; GO:0005773 vacuole; GO:0005775 vacuolar lumen; GO:0005829 cytosol; GO:0005886 plasma membrane; GO:0012505 endomembrane system; GO:0016020 membrane; GO:0030141 secretory granule; GO:0031410 cytoplasmic vesicle; GO:0031974 memb…	GO:0003824 catalytic activity; GO:0004175 endopeptidase activity; GO:0004197 cysteine-type endopeptidase activity; GO:0004198 calcium-dependent cysteine-type endopeptidase activity; GO:0005488 binding; GO:0005509 calcium ion binding; GO:0005515 protein binding; GO:0008233 peptidase activity; GO:0008234 cysteine-type peptidase activity; GO:0016787 hydrolase activity; GO:0042802 identical protein b…	PF13833	EF-hand domain pair	T	KOG0037	Ca2+-binding protein, EF-Hand protein superfamily
Q12913	Receptor-type tyrosine-protein phosphatase eta OS=Homo sapiens OX=9606 GN=PTPRJ PE=1 SV=3	PTPRJ	0.2668	0.008995	Down	145.94	5	4	4		0.326229	0.428796	1.03965	1.51072	1.69461	plasma membrane	K05698	PTPRJ; receptor-type tyrosine-protein phosphatase eta [EC:3.1.3.48]	hsa04520 Adherens junction	GO:0001558 regulation of cell growth; GO:0001568 blood vessel development; GO:0001570 vasculogenesis; GO:0001775 cell activation; GO:0001932 regulation of protein phosphorylation; GO:0001933 negative regulation of protein phosphorylation; GO:0001944 vasculature development; GO:0001952 regulation of cell-matrix adhesion; GO:0001954 positive regulation of cell-matrix adhesion; GO:0002252 immune eff…	GO:0001726 ruffle; GO:0001772 immunological synapse; GO:0005622 intracellular; GO:0005623 cell; GO:0005737 cytoplasm; GO:0005886 plasma membrane; GO:0005887 integral component of plasma membrane; GO:0005911 cell-cell junction; GO:0009986 cell surface; GO:0012505 endomembrane system; GO:0012506 vesicle membrane; GO:0016020 membrane; GO:0016021 integral component of membrane; GO:0030054 cell juncti…	GO:0003824 catalytic activity; GO:0004721 phosphoprotein phosphatase activity; GO:0004725 protein tyrosine phosphatase activity; GO:0005102 signaling receptor binding; GO:0005161 platelet-derived growth factor receptor binding; GO:0005488 binding; GO:0005515 protein binding; GO:0008013 beta-catenin binding; GO:0016787 hydrolase activity; GO:0016788 hydrolase activity, acting on ester bonds; GO:00…	PF00041; PF00102	Fibronectin type III domain; Protein-tyrosine phosphatase	T	KOG0791	Protein tyrosine phosphatase, contains fn3 domain
Q93084	Sarcoplasmic/endoplasmic reticulum calcium ATPase 3 OS=Homo sapiens OX=9606 GN=ATP2A3 PE=1 SV=3	ATP2A3	0.2668	3.0112e-05	Down	109.25	20	16	8	0.450122	0.390602	0.422996	1.45744	1.56211	1.71673	plasma membrane	K05853	ATP2A; P-type Ca2+ transporter type 2A [EC:7.2.2.10]	hsa05410 Hypertrophic cardiomyopathy; hsa04972 Pancreatic secretion; hsa05017 Spinocerebellar ataxia; hsa05412 Arrhythmogenic right ventricular cardiomyopathy; hsa04020 Calcium signaling pathway; hsa04919 Thyroid hormone signaling pathway; hsa04261 Adrenergic signaling in cardiomyocytes; hsa05010 Alzheimer disease; hsa04260 Cardiac muscle contraction; hsa04024 cAMP signaling pathway; hsa05022 Pat…	GO:0006810 transport; GO:0006811 ion transport; GO:0006812 cation transport; GO:0006816 calcium ion transport; GO:0008016 regulation of heart contraction; GO:0023051 regulation of signaling; GO:0030001 metal ion transport; GO:0034220 ion transmembrane transport; GO:0044057 regulation of system process; GO:0050789 regulation of biological process; GO:0051179 localization; GO:0051234 establishment …	GO:0005622 intracellular; GO:0005623 cell; GO:0005737 cytoplasm; GO:0005783 endoplasmic reticulum; GO:0005789 endoplasmic reticulum membrane; GO:0012505 endomembrane system; GO:0016020 membrane; GO:0016528 sarcoplasm; GO:0016529 sarcoplasmic reticulum; GO:0031090 organelle membrane; GO:0031094 platelet dense tubular network; GO:0031095 platelet dense tubular network membrane; GO:0031984 organelle…	GO:0003824 catalytic activity; GO:0005215 transporter activity; GO:0005388 calcium transmembrane transporter activity, phosphorylative mechanism; GO:0008324 cation transmembrane transporter activity; GO:0015075 ion transmembrane transporter activity; GO:0015085 calcium ion transmembrane transporter activity; GO:0015318 inorganic molecular entity transmembrane transporter activity; GO:0015399 prim…	PF00690; PF08282	Cation transporter/ATPase, N-terminus; haloacid dehalogenase-like hydrolase	P	KOG0202	Ca2+ transporting ATPase
P14780	Matrix metalloproteinase-9 OS=Homo sapiens OX=9606 GN=MMP9 PE=1 SV=3	MMP9	0.2679	0.0304922	Down	78.457	27.9	17	16	0.635039	0.485274	0.147481	1.41379	1.60732	1.7111	extracellular	K01403	MMP9; matrix metalloproteinase-9 (gelatinase B) [EC:3.4.24.35]	hsa05215 Prostate cancer; hsa04926 Relaxin signaling pathway; hsa05200 Pathways in cancer [Cancer network viewer]; hsa05161 Hepatitis B; hsa04668 TNF signaling pathway; hsa05202 Transcriptional misregulation in cancer; hsa05418 Fluid shear stress and atherosclerosis; hsa04670 Leukocyte transendothelial migration; hsa04657 IL-17 signaling pathway; hsa05205 Proteoglycans in cancer; hsa05206 MicroRN…	GO:0000003 reproduction; GO:0000302 response to reactive oxygen species; GO:0001101 response to acid chemical; GO:0001501 skeletal system development; GO:0001503 ossification; GO:0001655 urogenital system development; GO:0001666 response to hypoxia; GO:0001704 formation of primary germ layer; GO:0001706 endoderm formation; GO:0001775 cell activation; GO:0001822 kidney development; GO:0001932 regu…	GO:0005576 extracellular region; GO:0005615 extracellular space; GO:0005622 intracellular; GO:0005623 cell; GO:0005737 cytoplasm; GO:0012505 endomembrane system; GO:0030141 secretory granule; GO:0031410 cytoplasmic vesicle; GO:0031974 membrane-enclosed lumen; GO:0031982 vesicle; GO:0032991 protein-containing complex; GO:0043226 organelle; GO:0043227 membrane-bounded organelle; GO:0043229 intracel…	GO:0001968 fibronectin binding; GO:0003824 catalytic activity; GO:0004175 endopeptidase activity; GO:0004222 metalloendopeptidase activity; GO:0004252 serine-type endopeptidase activity; GO:0005488 binding; GO:0005515 protein binding; GO:0005518 collagen binding; GO:0008233 peptidase activity; GO:0008236 serine-type peptidase activity; GO:0008237 metallopeptidase activity; GO:0008270 zinc ion bin…	PF01471; PF00413; PF00040	Putative peptidoglycan binding domain; Matrixin; Fibronectin type II domain	OW	KOG1565	Gelatinase A and related matrix metalloproteases
Q96SF2	T-complex protein 1 subunit theta-like 2 OS=Homo sapiens OX=9606 GN=CCT8L2 PE=2 SV=2	CCT8L2	0.2697	1.44072e-05	Down	59.387	15.1	6	6	0.454972	0.43279	0.386857	1.58253	1.51866	1.6242	cytoplasm,nucleus				GO:0006457 protein folding; GO:0006458 'de novo' protein folding; GO:0006810 transport; GO:0006811 ion transport; GO:0006812 cation transport; GO:0006813 potassium ion transport; GO:0006820 anion transport; GO:0009987 cellular process; GO:0015672 monovalent inorganic cation transport; GO:0015698 inorganic anion transport; GO:0030001 metal ion transport; GO:0034220 ion transmembrane transport; GO:…	GO:0005622 intracellular; GO:0005623 cell; GO:0005737 cytoplasm; GO:0005829 cytosol; GO:0005832 chaperonin-containing T-complex; GO:0032991 protein-containing complex; GO:0101031 chaperone complex;	GO:0005215 transporter activity; GO:0005216 ion channel activity; GO:0005227 calcium activated cation channel activity; GO:0005253 anion channel activity; GO:0005261 cation channel activity; GO:0005267 potassium channel activity; GO:0005488 binding; GO:0005515 protein binding; GO:0008324 cation transmembrane transporter activity; GO:0008509 anion transmembrane transporter activity; GO:0015075 ion…			O	KOG0362	Chaperonin complex component, TCP-1 theta subunit (CCT8)
Q99714	3-hydroxyacyl-CoA dehydrogenase type-2 OS=Homo sapiens OX=9606 GN=HSD17B10 PE=1 SV=3	HSD17B10	0.272	9.94211e-09	Down	26.923	64	12	12	0.429802	0.426456	0.426874	1.56758	1.55338	1.59591	mitochondria	K08683	HSD17B10; 3-hydroxyacyl-CoA dehydrogenase / 3-hydroxy-2-methylbutyryl-CoA dehydrogenase [EC:1.1.1.35 1.1.1.178]	hsa05022 Pathways of neurodegeneration - multiple diseases; hsa00280 Valine, leucine and isoleucine degradation; hsa05010 Alzheimer disease; hsa01100 Metabolic pathways	GO:0000003 reproduction; GO:0000959 mitochondrial RNA metabolic process; GO:0000963 mitochondrial RNA processing; GO:0000964 mitochondrial RNA 5'-end processing; GO:0000965 mitochondrial RNA 3'-end processing; GO:0000966 RNA 5'-end processing; GO:0001510 RNA methylation; GO:0003006 developmental process involved in reproduction; GO:0006082 organic acid metabolic process; GO:0006139 nucleobase-con…	GO:0005622 intracellular; GO:0005623 cell; GO:0005737 cytoplasm; GO:0005739 mitochondrion; GO:0005759 mitochondrial matrix; GO:0005783 endoplasmic reticulum; GO:0005886 plasma membrane; GO:0009295 nucleoid; GO:0012505 endomembrane system; GO:0016020 membrane; GO:0030677 ribonuclease P complex; GO:0030678 mitochondrial ribonuclease P complex; GO:0031974 membrane-enclosed lumen; GO:0032991 protein-…	GO:0000049 tRNA binding; GO:0000166 nucleotide binding; GO:0001540 amyloid-beta binding; GO:0003676 nucleic acid binding; GO:0003723 RNA binding; GO:0003824 catalytic activity; GO:0003857 3-hydroxyacyl-CoA dehydrogenase activity; GO:0004303 estradiol 17-beta-dehydrogenase activity; GO:0005102 signaling receptor binding; GO:0005488 binding; GO:0005496 steroid binding; GO:0005515 protein binding; G…	PF00106	short chain dehydrogenase	Q	KOG1199	Short-chain alcohol dehydrogenase/3-hydroxyacyl-CoA dehydrogenase
Q8TCT1	Phosphoethanolamine/phosphocholine phosphatase OS=Homo sapiens OX=9606 GN=PHOSPHO1 PE=1 SV=1	PHOSPHO1	0.2739	0.000111468	Down	29.713	15	4	4	0.384564	0.487802	0.417641	1.72679	1.51919	1.46402	cytoplasm,nucleus	K06124	PHOSPHO1; phosphoethanolamine/phosphocholine phosphatase [EC:3.1.3.75]	hsa00564 Glycerophospholipid metabolism; hsa01100 Metabolic pathways	GO:0001501 skeletal system development; GO:0001503 ossification; GO:0001958 endochondral ossification; GO:0006629 lipid metabolic process; GO:0006644 phospholipid metabolic process; GO:0006646 phosphatidylethanolamine biosynthetic process; GO:0006650 glycerophospholipid metabolic process; GO:0006656 phosphatidylcholine biosynthetic process; GO:0006793 phosphorus metabolic process; GO:0006796 phos…	GO:0005576 extracellular region; GO:0005622 intracellular; GO:0005623 cell; GO:0005737 cytoplasm; GO:0005829 cytosol; GO:0031012 extracellular matrix; GO:0043226 organelle; GO:0043227 membrane-bounded organelle; GO:0043230 extracellular organelle; GO:0065010 extracellular membrane-bounded organelle;	GO:0003824 catalytic activity; GO:0016462 pyrophosphatase activity; GO:0016787 hydrolase activity; GO:0016788 hydrolase activity, acting on ester bonds; GO:0016791 phosphatase activity; GO:0016817 hydrolase activity, acting on acid anhydrides; GO:0016818 hydrolase activity, acting on acid anhydrides, in phosphorus-containing anhydrides; GO:0042578 phosphoric ester hydrolase activity; GO:0052731 p…			S	KOG3120	Predicted haloacid dehalogenase-like hydrolase
Q4G176	Malonate--CoA ligase ACSF3, mitochondrial OS=Homo sapiens OX=9606 GN=ACSF3 PE=1 SV=3	ACSF3	0.275	0.0040273	Down	64.129	8.7	5	5	0.421122	0.432009	0.440834	1.37561	1.0979	2.23253	mitochondria	K18660	ACSF3; malonyl-CoA/methylmalonyl-CoA synthetase [EC:6.2.1.-]	hsa00061 Fatty acid biosynthesis; hsa00280 Valine, leucine and isoleucine degradation; hsa01212 Fatty acid metabolism; hsa01100 Metabolic pathways	GO:0006082 organic acid metabolic process; GO:0006139 nucleobase-containing compound metabolic process; GO:0006163 purine nucleotide metabolic process; GO:0006164 purine nucleotide biosynthetic process; GO:0006629 lipid metabolic process; GO:0006631 fatty acid metabolic process; GO:0006633 fatty acid biosynthetic process; GO:0006637 acyl-CoA metabolic process; GO:0006725 cellular aromatic compoun…	GO:0005622 intracellular; GO:0005623 cell; GO:0005737 cytoplasm; GO:0005739 mitochondrion; GO:0005759 mitochondrial matrix; GO:0031974 membrane-enclosed lumen; GO:0043226 organelle; GO:0043227 membrane-bounded organelle; GO:0043229 intracellular organelle; GO:0043231 intracellular membrane-bounded organelle; GO:0043233 organelle lumen; GO:0070013 intracellular organelle lumen;	GO:0003824 catalytic activity; GO:0015645 fatty acid ligase activity; GO:0016405 CoA-ligase activity; GO:0016874 ligase activity; GO:0016877 ligase activity, forming carbon-sulfur bonds; GO:0016878 acid-thiol ligase activity; GO:0031957 very long-chain fatty acid-CoA ligase activity; GO:0090409 malonyl-CoA synthetase activity;	PF13193	Domain of unknown function (DUF4009)	I	KOG1176	Acyl-CoA synthetase
Q5BJF6	Outer dense fiber protein 2 OS=Homo sapiens OX=9606 GN=ODF2 PE=1 SV=1	ODF2	0.2782	2.69869e-08	Down	95.4	42.3	33	33	0.437455	0.43122	0.437279	1.54865	1.59405	1.55134	nucleus	K16479			GO:0000003 reproduction; GO:0000086 G2/M transition of mitotic cell cycle; GO:0000226 microtubule cytoskeleton organization; GO:0000278 mitotic cell cycle; GO:0003006 developmental process involved in reproduction; GO:0006996 organelle organization; GO:0007010 cytoskeleton organization; GO:0007017 microtubule-based process; GO:0007049 cell cycle; GO:0007098 centrosome cycle; GO:0007276 gamete gen…	GO:0001520 outer dense fiber; GO:0005622 intracellular; GO:0005623 cell; GO:0005737 cytoplasm; GO:0005813 centrosome; GO:0005814 centriole; GO:0005815 microtubule organizing center; GO:0005829 cytosol; GO:0005856 cytoskeleton; GO:0005929 cilium; GO:0015630 microtubule cytoskeleton; GO:0031514 motile cilium; GO:0032991 protein-containing complex; GO:0036064 ciliary basal body; GO:0036126 sperm fla…	GO:0005198 structural molecule activity; GO:0005200 structural constituent of cytoskeleton; GO:0005488 binding; GO:0005515 protein binding; GO:0017016 Ras GTPase binding; GO:0017137 Rab GTPase binding; GO:0019899 enzyme binding; GO:0031267 small GTPase binding; GO:0051020 GTPase binding;
Q99417	c-Myc-binding protein OS=Homo sapiens OX=9606 GN=MYCBP PE=1 SV=3	MYCBP	0.2782	0.00312776	Down	11.967	46.6	3	3	0.536723	0.292831	0.4762	1.42014	1.42438	1.84973	cytoplasm				GO:0006355 regulation of transcription, DNA-templated; GO:0009889 regulation of biosynthetic process; GO:0009891 positive regulation of biosynthetic process; GO:0009893 positive regulation of metabolic process; GO:0010468 regulation of gene expression; GO:0010556 regulation of macromolecule biosynthetic process; GO:0010557 positive regulation of macromolecule biosynthetic process; GO:0010604 posi…	GO:0005622 intracellular; GO:0005623 cell; GO:0005634 nucleus; GO:0043226 organelle; GO:0043227 membrane-bounded organelle; GO:0043229 intracellular organelle; GO:0043231 intracellular membrane-bounded organelle;	GO:0003712 transcription coregulator activity; GO:0003713 transcription coactivator activity; GO:0140110 transcription regulator activity;
P07948	Tyrosine-protein kinase Lyn OS=Homo sapiens OX=9606 GN=LYN PE=1 SV=3	LYN	0.2794	0.00456733	Down	58.573	6.8	3	2	0.331116	0.329961	0.649101	1.42875	1.54661	1.71446	cytoplasm,nucleus	K05854	LYN; tyrosine-protein kinase Lyn [EC:2.7.10.2]	hsa05120 Epithelial cell signaling in Helicobacter pylori infection; hsa04666 Fc gamma R-mediated phagocytosis; hsa04062 Chemokine signaling pathway; hsa04664 Fc epsilon RI signaling pathway; hsa04662 B cell receptor signaling pathway; hsa05203 Viral carcinogenesis; hsa05169 Epstein-Barr virus infection; hsa04730 Long-term depression; hsa04064 NF-kappa B signaling pathway; hsa05167 Kaposi sarcoma…	GO:0001101 response to acid chemical; GO:0001775 cell activation; GO:0001776 leukocyte homeostasis; GO:0001782 B cell homeostasis; GO:0001817 regulation of cytokine production; GO:0001932 regulation of protein phosphorylation; GO:0001933 negative regulation of protein phosphorylation; GO:0001934 positive regulation of protein phosphorylation; GO:0002218 activation of innate immune response; GO:00…	GO:0005622 intracellular; GO:0005623 cell; GO:0005634 nucleus; GO:0005737 cytoplasm; GO:0005794 Golgi apparatus; GO:0005829 cytosol; GO:0005886 plasma membrane; GO:0009898 cytoplasmic side of plasma membrane; GO:0012505 endomembrane system; GO:0016020 membrane; GO:0019897 extrinsic component of plasma membrane; GO:0019898 extrinsic component of membrane; GO:0031234 extrinsic component of cytoplas…	GO:0003824 catalytic activity; GO:0004672 protein kinase activity; GO:0004713 protein tyrosine kinase activity; GO:0004715 non-membrane spanning protein tyrosine kinase activity; GO:0005102 signaling receptor binding; GO:0005488 binding; GO:0005515 protein binding; GO:0016301 kinase activity; GO:0016740 transferase activity; GO:0016772 transferase activity, transferring phosphorus-containing grou…	PF00018; PF00017; PF07714	SH3 domain; SH2 domain; Protein tyrosine kinase	T	KOG0197	Tyrosine kinases
P25774	Cathepsin S OS=Homo sapiens OX=9606 GN=CTSS PE=1 SV=3	CTSS	0.2801	1.69878e-06	Down	37.495	19.6	5	5	0.4381	0.434606	0.440124	1.61562	1.47321	1.59834	extracellular	K01368	CTSS; cathepsin S [EC:3.4.22.27]	hsa04142 Lysosome; hsa04145 Phagosome; hsa05152 Tuberculosis; hsa04612 Antigen processing and presentation; hsa04210 Apoptosis	GO:0001775 cell activation; GO:0001894 tissue homeostasis; GO:0002218 activation of innate immune response; GO:0002221 pattern recognition receptor signaling pathway; GO:0002224 toll-like receptor signaling pathway; GO:0002250 adaptive immune response; GO:0002252 immune effector process; GO:0002253 activation of immune response; GO:0002263 cell activation involved in immune response; GO:0002274 m…	GO:0000323 lytic vacuole; GO:0005576 extracellular region; GO:0005615 extracellular space; GO:0005622 intracellular; GO:0005623 cell; GO:0005737 cytoplasm; GO:0005764 lysosome; GO:0005768 endosome; GO:0005769 early endosome; GO:0005773 vacuole; GO:0005775 vacuolar lumen; GO:0009986 cell surface; GO:0012505 endomembrane system; GO:0016020 membrane; GO:0030141 secretory granule; GO:0031410 cytoplas…	GO:0001968 fibronectin binding; GO:0003824 catalytic activity; GO:0004175 endopeptidase activity; GO:0004197 cysteine-type endopeptidase activity; GO:0004252 serine-type endopeptidase activity; GO:0005488 binding; GO:0005515 protein binding; GO:0005518 collagen binding; GO:0008233 peptidase activity; GO:0008234 cysteine-type peptidase activity; GO:0008236 serine-type peptidase activity; GO:001678…	PF08246; PF00112	Cathepsin propeptide inhibitor domain (I29); Papain family cysteine protease	O	KOG1543	Cysteine proteinase Cathepsin L
Q7Z4W2	Lysozyme-like protein 2 OS=Homo sapiens OX=9606 GN=LYZL2 PE=2 SV=2	LYZL2	0.2805	2.63702e-05	Down	16.656	26.4	3	2	0.44749	0.396256	0.470642	1.59453	1.61622	1.47486	extracellular	K01185			GO:0006950 response to stress; GO:0006952 defense response; GO:0008152 metabolic process; GO:0009056 catabolic process; GO:0009605 response to external stimulus; GO:0009607 response to biotic stimulus; GO:0009617 response to bacterium; GO:0009987 cellular process; GO:0016998 cell wall macromolecule catabolic process; GO:0042742 defense response to bacterium; GO:0043170 macromolecule metabolic pro…	GO:0005576 extracellular region; GO:0005615 extracellular space;	GO:0003796 lysozyme activity; GO:0003824 catalytic activity; GO:0004553 hydrolase activity, hydrolyzing O-glycosyl compounds; GO:0016787 hydrolase activity; GO:0016798 hydrolase activity, acting on glycosyl bonds; GO:0061783 peptidoglycan muralytic activity;	PF00062	C-type lysozyme/alpha-lactalbumin family
O15162	Phospholipid scramblase 1 OS=Homo sapiens OX=9606 GN=PLSCR1 PE=1 SV=1	PLSCR1	0.282	1.49601e-05	Down	35.049	11.6	4	4	0.427342	0.410231	0.48237	1.5963	1.52263	1.56113	cytoplasm				GO:0001775 cell activation; GO:0002252 immune effector process; GO:0002376 immune system process; GO:0002526 acute inflammatory response; GO:0002682 regulation of immune system process; GO:0002684 positive regulation of immune system process; GO:0002694 regulation of leukocyte activation; GO:0006139 nucleobase-containing compound metabolic process; GO:0006351 transcription, DNA-templated; GO:0006…	GO:0005576 extracellular region; GO:0005622 intracellular; GO:0005623 cell; GO:0005634 nucleus; GO:0005730 nucleolus; GO:0005737 cytoplasm; GO:0005794 Golgi apparatus; GO:0005829 cytosol; GO:0005886 plasma membrane; GO:0005887 integral component of plasma membrane; GO:0012505 endomembrane system; GO:0016020 membrane; GO:0016021 integral component of membrane; GO:0031012 extracellular matrix; GO:0…	GO:0000981 DNA-binding transcription factor activity, RNA polymerase II-specific; GO:0001228 DNA-binding transcription activator activity, RNA polymerase II-specific; GO:0003700 DNA-binding transcription factor activity; GO:0005102 signaling receptor binding; GO:0005154 epidermal growth factor receptor binding; GO:0005215 transporter activity; GO:0005319 lipid transporter activity; GO:0005488 bin…	PF03803	Scramblase	K	KOG0621	Phospholipid scramblase
Q6UWQ5	Lysozyme-like protein 1 OS=Homo sapiens OX=9606 GN=LYZL1 PE=2 SV=2	LYZL1	0.2846	4.5149e-05	Down	16.654	26.4	3	2	0.45191	0.452971	0.424419	1.5095	1.74676	1.41444	extracellular	K13915	LYZ; lysozyme C [EC:3.2.1.17]	hsa04970 Salivary secretion	GO:0006950 response to stress; GO:0006952 defense response; GO:0008152 metabolic process; GO:0009056 catabolic process; GO:0009605 response to external stimulus; GO:0009607 response to biotic stimulus; GO:0009617 response to bacterium; GO:0009987 cellular process; GO:0016998 cell wall macromolecule catabolic process; GO:0042742 defense response to bacterium; GO:0043170 macromolecule metabolic pro…	GO:0005576 extracellular region; GO:0005615 extracellular space;	GO:0003796 lysozyme activity; GO:0003824 catalytic activity; GO:0004553 hydrolase activity, hydrolyzing O-glycosyl compounds; GO:0016787 hydrolase activity; GO:0016798 hydrolase activity, acting on glycosyl bonds; GO:0061783 peptidoglycan muralytic activity;	PF00062	C-type lysozyme/alpha-lactalbumin family
A2RUT3	Transmembrane protein 89 OS=Homo sapiens OX=9606 GN=TMEM89 PE=2 SV=1	TMEM89	0.2866	2.3151e-06	Down	17.571	56.6	7	7	0.446151	0.441339	0.449022	1.60863	1.46074	1.59411	extracellular
P35663	Cylicin-1 OS=Homo sapiens OX=9606 GN=CYLC1 PE=2 SV=2	CYLC1	0.2869	0.00202268	Down	74.241	6.8	3	3	0.548496	0.476901	0.312159	1.46756	1.46706	1.72782	nucleus				GO:0000003 reproduction; GO:0007276 gamete generation; GO:0007283 spermatogenesis; GO:0019953 sexual reproduction; GO:0022414 reproductive process; GO:0032501 multicellular organismal process; GO:0032504 multicellular organism reproduction; GO:0044703 multi-organism reproductive process; GO:0048232 male gamete generation; GO:0048609 multicellular organismal reproductive process; GO:0051704 multi-…	GO:0001669 acrosomal vesicle; GO:0005622 intracellular; GO:0005623 cell; GO:0005737 cytoplasm; GO:0005773 vacuole; GO:0005856 cytoskeleton; GO:0012505 endomembrane system; GO:0030141 secretory granule; GO:0031410 cytoplasmic vesicle; GO:0031982 vesicle; GO:0033011 perinuclear theca; GO:0033150 cytoskeletal calyx; GO:0043159 acrosomal matrix; GO:0043226 organelle; GO:0043227 membrane-bounded organ…	GO:0005198 structural molecule activity;
P40121	Macrophage-capping protein OS=Homo sapiens OX=9606 GN=CAPG PE=1 SV=2	CAPG	0.2897	5.9351e-06	Down	38.498	30.7	7	7	0.46031	0.460571	0.426788	1.49276	1.64361	1.51596	cytoplasm	K10368			GO:0002376 immune system process; GO:0006950 response to stress; GO:0006952 defense response; GO:0006955 immune response; GO:0008064 regulation of actin polymerization or depolymerization; GO:0009987 cellular process; GO:0010033 response to organic substance; GO:0010639 negative regulation of organelle organization; GO:0016043 cellular component organization; GO:0022607 cellular component assembl…	GO:0005622 intracellular; GO:0005623 cell; GO:0005634 nucleus; GO:0005654 nucleoplasm; GO:0005730 nucleolus; GO:0005737 cytoplasm; GO:0005814 centriole; GO:0005815 microtubule organizing center; GO:0005819 spindle; GO:0005856 cytoskeleton; GO:0008290 F-actin capping protein complex; GO:0015629 actin cytoskeleton; GO:0015630 microtubule cytoskeleton; GO:0030139 endocytic vesicle; GO:0030496 midbod…	GO:0005488 binding; GO:0005515 protein binding; GO:0019904 protein domain specific binding; GO:0044877 protein-containing complex binding;	PF00626	Gelsolin repeat	Z	KOG0443	Actin regulatory proteins (gelsolin/villin family)
Q6ZU69	Protein FAM205A OS=Homo sapiens OX=9606 GN=FAM205A PE=2 SV=4	FAM205A	0.2901	6.36105e-07	Down	148.09	27.6	26	26	0.44247	0.459551	0.447006	1.58048	1.49118	1.57931	endoplasmic reticulum
P62942	Peptidyl-prolyl cis-trans isomerase FKBP1A OS=Homo sapiens OX=9606 GN=FKBP1A PE=1 SV=2	FKBP1A	0.2914	1.46616e-06	Down	11.951	41.7	5	5	0.459851	0.430914	0.462969	1.51208	1.54145	1.59274	cytoplasm	K09568			GO:0009966 regulation of signal transduction; GO:0010522 regulation of calcium ion transport into cytosol; GO:0010646 regulation of cell communication; GO:0010880 regulation of release of sequestered calcium ion into cytosol by sarcoplasmic reticulum; GO:0010959 regulation of metal ion transport; GO:0022898 regulation of transmembrane transporter activity; GO:0023051 regulation of signaling; GO:0…	GO:0005622 intracellular; GO:0005623 cell; GO:0005737 cytoplasm; GO:0005783 endoplasmic reticulum; GO:0005789 endoplasmic reticulum membrane; GO:0005886 plasma membrane; GO:0005891 voltage-gated calcium channel complex; GO:0012505 endomembrane system; GO:0014802 terminal cisterna; GO:0016020 membrane; GO:0016021 integral component of membrane; GO:0016528 sarcoplasm; GO:0016529 sarcoplasmic reticu…	GO:0005488 binding; GO:0008144 drug binding;	PF00254	FKBP-type peptidyl-prolyl cis-trans isomerase	O	KOG0544	FKBP-type peptidyl-prolyl cis-trans isomerase
P00450	Ceruloplasmin OS=Homo sapiens OX=9606 GN=CP PE=1 SV=1	CP	0.2918	5.38879e-05	Down	122.2	18	14	14	0.486575	0.44285	0.426041	1.38771	1.58937	1.66746	endoplasmic reticulum	K13624	CP; ceruloplasmin [EC:1.16.3.1]	hsa04216 Ferroptosis; hsa00860 Porphyrin and chlorophyll metabolism	GO:0006464 cellular protein modification process; GO:0006807 nitrogen compound metabolic process; GO:0006873 cellular ion homeostasis; GO:0006875 cellular metal ion homeostasis; GO:0006879 cellular iron ion homeostasis; GO:0008152 metabolic process; GO:0009987 cellular process; GO:0019538 protein metabolic process; GO:0019725 cellular homeostasis; GO:0030003 cellular cation homeostasis; GO:003621…	GO:0005576 extracellular region; GO:0005615 extracellular space; GO:0005622 intracellular; GO:0005623 cell; GO:0005737 cytoplasm; GO:0005783 endoplasmic reticulum; GO:0005788 endoplasmic reticulum lumen; GO:0012505 endomembrane system; GO:0031974 membrane-enclosed lumen; GO:0043226 organelle; GO:0043227 membrane-bounded organelle; GO:0043229 intracellular organelle; GO:0043231 intracellular membr…	GO:0003824 catalytic activity; GO:0004322 ferroxidase activity; GO:0005488 binding; GO:0005515 protein binding; GO:0016491 oxidoreductase activity; GO:0016722 oxidoreductase activity, oxidizing metal ions; GO:0016724 oxidoreductase activity, oxidizing metal ions, oxygen as acceptor; GO:0051087 chaperone binding;	PF07732; PF00394; PF07731	Multicopper oxidase; Multicopper oxidase; Multicopper oxidase	Q	KOG1263	Multicopper oxidases
Q14019	Coactosin-like protein OS=Homo sapiens OX=9606 GN=COTL1 PE=1 SV=3	COTL1	0.2919	6.53736e-05	Down	15.945	36.6	3	3	0.404016	0.494572	0.45701	1.66408	1.53095	1.44937	cytoplasm				GO:0001775 cell activation; GO:0002252 immune effector process; GO:0002263 cell activation involved in immune response; GO:0002274 myeloid leukocyte activation; GO:0002275 myeloid cell activation involved in immune response; GO:0002283 neutrophil activation involved in immune response; GO:0002366 leukocyte activation involved in immune response; GO:0002376 immune system process; GO:0002443 leukoc…	GO:0005576 extracellular region; GO:0005622 intracellular; GO:0005623 cell; GO:0005737 cytoplasm; GO:0012505 endomembrane system; GO:0030141 secretory granule; GO:0031410 cytoplasmic vesicle; GO:0031974 membrane-enclosed lumen; GO:0031982 vesicle; GO:0031983 vesicle lumen; GO:0034774 secretory granule lumen; GO:0043226 organelle; GO:0043227 membrane-bounded organelle; GO:0043229 intracellular org…	GO:0003779 actin binding; GO:0005488 binding; GO:0005515 protein binding; GO:0008092 cytoskeletal protein binding; GO:0019899 enzyme binding;	PF00241	Cofilin/tropomyosin-type actin-binding protein	Z	KOG3655	Drebrins and related actin binding proteins
Q6ZUB0	Spermatogenesis-associated protein 31D4 OS=Homo sapiens OX=9606 GN=SPATA31D4 PE=2 SV=2	SPATA31D4	0.2945	1.08248e-06	Down	102.3	20.6	12	8	0.466466	0.436087	0.462433	1.53529	1.51392	1.5858	cytoplasm
O75425	Motile sperm domain-containing protein 3 OS=Homo sapiens OX=9606 GN=MOSPD3 PE=1 SV=1	MOSPD3	0.2949	0.0140814	Down	25.518	23.4	4	4	0.366278	0.455146		1.64055	1.56946	0.968567	plasma membrane				GO:0007275 multicellular organism development; GO:0007507 heart development; GO:0032501 multicellular organismal process; GO:0032502 developmental process; GO:0048513 animal organ development; GO:0048731 system development; GO:0048856 anatomical structure development; GO:0072359 circulatory system development;	GO:0016020 membrane; GO:0016021 integral component of membrane; GO:0031224 intrinsic component of membrane;		PF00635	MSP (Major sperm protein) domain	U	KOG0439	VAMP-associated protein involved in inositol metabolism
Q13939	Calicin OS=Homo sapiens OX=9606 GN=CCIN PE=2 SV=3	CCIN	0.2986	6.89252e-08	Down	66.581	56.6	31	31	0.450548	0.467664	0.461402	1.5288	1.55901	1.53258	nucleus					GO:0000151 ubiquitin ligase complex; GO:0005622 intracellular; GO:0005623 cell; GO:0005737 cytoplasm; GO:0005856 cytoskeleton; GO:0015629 actin cytoskeleton; GO:0031461 cullin-RING ubiquitin ligase complex; GO:0031463 Cul3-RING ubiquitin ligase complex; GO:0032991 protein-containing complex; GO:0033011 perinuclear theca; GO:0033150 cytoskeletal calyx; GO:0043226 organelle; GO:0043228 non-membrane…	GO:0003779 actin binding; GO:0005488 binding; GO:0005515 protein binding; GO:0008092 cytoskeletal protein binding;	PF00651; PF07707	BTB/POZ domain; BTB And C-terminal Kelch	T	KOG4441	Proteins containing BTB/POZ and Kelch domains, involved in regulatory/signal transduction processes
Q8TC36	SUN domain-containing protein 5 OS=Homo sapiens OX=9606 GN=SUN5 PE=1 SV=1	SUN5	0.2999	5.81667e-06	Down	43.081	44.6	13	13	0.487795	0.462805	0.433578	1.49303	1.58085	1.54193	cytoplasm,nucleus	K21876			GO:0000003 reproduction; GO:0003006 developmental process involved in reproduction; GO:0006996 organelle organization; GO:0006997 nucleus organization; GO:0006998 nuclear envelope organization; GO:0007010 cytoskeleton organization; GO:0007276 gamete generation; GO:0007281 germ cell development; GO:0007283 spermatogenesis; GO:0007286 spermatid development; GO:0008104 protein localization; GO:00099…	GO:0005622 intracellular; GO:0005623 cell; GO:0005634 nucleus; GO:0005635 nuclear envelope; GO:0005637 nuclear inner membrane; GO:0005929 cilium; GO:0012505 endomembrane system; GO:0016020 membrane; GO:0019866 organelle inner membrane; GO:0031090 organelle membrane; GO:0031514 motile cilium; GO:0031965 nuclear membrane; GO:0031967 organelle envelope; GO:0031975 envelope; GO:0036126 sperm flagellu…	GO:0005488 binding; GO:0005515 protein binding; GO:0043495 protein-membrane adaptor activity;			D	KOG2687	Spindle pole body protein, contains UNC-84 domain
Q9UMX2	Ornithine decarboxylase antizyme 3 OS=Homo sapiens OX=9606 GN=OAZ3 PE=1 SV=2	OAZ3	0.3034	4.69189e-06	Down	27.413	6.4	2	2	0.485425	0.443286	0.467796	1.50052	1.49463	1.60835	nucleus	K16614			GO:0006576 cellular biogenic amine metabolic process; GO:0006595 polyamine metabolic process; GO:0006807 nitrogen compound metabolic process; GO:0006810 transport; GO:0006811 ion transport; GO:0006812 cation transport; GO:0008152 metabolic process; GO:0009308 amine metabolic process; GO:0009893 positive regulation of metabolic process; GO:0009894 regulation of catabolic process; GO:0009896 positi…	GO:0005622 intracellular; GO:0005623 cell; GO:0005634 nucleus; GO:0005654 nucleoplasm; GO:0005737 cytoplasm; GO:0005929 cilium; GO:0031514 motile cilium; GO:0031974 membrane-enclosed lumen; GO:0031981 nuclear lumen; GO:0036126 sperm flagellum; GO:0042995 cell projection; GO:0043226 organelle; GO:0043227 membrane-bounded organelle; GO:0043229 intracellular organelle; GO:0043231 intracellular membr…	GO:0004857 enzyme inhibitor activity; GO:0005215 transporter activity; GO:0005488 binding; GO:0005515 protein binding; GO:0008073 ornithine decarboxylase inhibitor activity; GO:0008324 cation transmembrane transporter activity; GO:0008519 ammonium transmembrane transporter activity; GO:0015075 ion transmembrane transporter activity; GO:0015101 organic cation transmembrane transporter activity; GO…			E	KOG4387	Ornithine decarboxylase antizyme
P30536	Translocator protein OS=Homo sapiens OX=9606 GN=TSPO PE=1 SV=3	TSPO	0.3046	9.53473e-06	Down	18.828	9.5	2	2	0.446687	0.499174	0.455202	1.5193	1.60483	1.47481	mitochondria	K05770	TSPO; translocator protein	hsa04080 Neuroactive ligand-receptor interaction; hsa04979 Cholesterol metabolism; hsa05166 Human T-cell leukemia virus 1 infection	GO:0001505 regulation of neurotransmitter levels; GO:0001817 regulation of cytokine production; GO:0001818 negative regulation of cytokine production; GO:0002237 response to molecule of bacterial origin; GO:0003254 regulation of membrane depolarization; GO:0006140 regulation of nucleotide metabolic process; GO:0006605 protein targeting; GO:0006626 protein targeting to mitochondrion; GO:0006629 li…	GO:0005622 intracellular; GO:0005623 cell; GO:0005737 cytoplasm; GO:0005739 mitochondrion; GO:0005740 mitochondrial envelope; GO:0005741 mitochondrial outer membrane; GO:0016020 membrane; GO:0019867 outer membrane; GO:0031090 organelle membrane; GO:0031966 mitochondrial membrane; GO:0031967 organelle envelope; GO:0031968 organelle outer membrane; GO:0031975 envelope; GO:0043226 organelle; GO:0043…	GO:0005215 transporter activity; GO:0005319 lipid transporter activity; GO:0005488 binding; GO:0005496 steroid binding; GO:0005497 androgen binding; GO:0005515 protein binding; GO:0008289 lipid binding; GO:0008503 benzodiazepine receptor activity; GO:0015248 sterol transporter activity; GO:0015485 cholesterol binding; GO:0030594 neurotransmitter receptor activity; GO:0032934 sterol binding; GO:00…			T	KOG3797	Peripheral-type benzodiazepine receptor and related proteins
P35754	Glutaredoxin-1 OS=Homo sapiens OX=9606 GN=GLRX PE=1 SV=2	GLRX	0.3047	0.0108167	Down	11.776	24.5	3	3	0.667447	0.262927	0.470882	1.66365	1.5815	1.35359	cytoplasm	K03676			GO:0000003 reproduction; GO:0001678 cellular glucose homeostasis; GO:0002028 regulation of sodium ion transport; GO:0002791 regulation of peptide secretion; GO:0002793 positive regulation of peptide secretion; GO:0002931 response to ischemia; GO:0006139 nucleobase-containing compound metabolic process; GO:0006464 cellular protein modification process; GO:0006725 cellular aromatic compound metabol…	GO:0005622 intracellular; GO:0005623 cell; GO:0005634 nucleus; GO:0005737 cytoplasm; GO:0005739 mitochondrion; GO:0005740 mitochondrial envelope; GO:0005758 mitochondrial intermembrane space; GO:0005829 cytosol; GO:0030425 dendrite; GO:0031967 organelle envelope; GO:0031970 organelle envelope lumen; GO:0031974 membrane-enclosed lumen; GO:0031975 envelope; GO:0036477 somatodendritic compartment; G…	GO:0003824 catalytic activity; GO:0005488 binding; GO:0005515 protein binding; GO:0015035 protein disulfide oxidoreductase activity; GO:0015036 disulfide oxidoreductase activity; GO:0015037 peptide disulfide oxidoreductase activity; GO:0015038 glutathione disulfide oxidoreductase activity; GO:0016491 oxidoreductase activity; GO:0016667 oxidoreductase activity, acting on a sulfur group of donors; …	PF00462	Glutaredoxin	O	KOG1752	Glutaredoxin and related proteins
Q96QH8	Sperm acrosome-associated protein 5 OS=Homo sapiens OX=9606 GN=SPACA5 PE=2 SV=1	SPACA5	0.3062	1.42878e-07	Down	17.896	35.2	5	5	0.470582	0.458146	0.477962	1.52946	1.51086	1.553	extracellular	K01185			GO:0006950 response to stress; GO:0006952 defense response; GO:0008152 metabolic process; GO:0009056 catabolic process; GO:0009605 response to external stimulus; GO:0009607 response to biotic stimulus; GO:0009617 response to bacterium; GO:0009987 cellular process; GO:0016998 cell wall macromolecule catabolic process; GO:0042742 defense response to bacterium; GO:0043170 macromolecule metabolic pro…	GO:0005576 extracellular region; GO:0005615 extracellular space;	GO:0003796 lysozyme activity; GO:0003824 catalytic activity; GO:0004553 hydrolase activity, hydrolyzing O-glycosyl compounds; GO:0016787 hydrolase activity; GO:0016798 hydrolase activity, acting on glycosyl bonds; GO:0061783 peptidoglycan muralytic activity;	PF00062	C-type lysozyme/alpha-lactalbumin family
P16219	Short-chain specific acyl-CoA dehydrogenase, mitochondrial OS=Homo sapiens OX=9606 GN=ACADS PE=1 SV=1	ACADS	0.3068	3.73185e-10	Down	44.297	51.5	16	16	0.470319	0.467441	0.470873	1.52473	1.5374	1.52924	mitochondria	K00248	ACADS; butyryl-CoA dehydrogenase [EC:1.3.8.1]	hsa00071 Fatty acid degradation; hsa00650 Butanoate metabolism; hsa00410 beta-Alanine metabolism; hsa01212 Fatty acid metabolism; hsa00640 Propanoate metabolism; hsa01200 Carbon metabolism; hsa01100 Metabolic pathways; hsa00280 Valine, leucine and isoleucine degradation	GO:0006082 organic acid metabolic process; GO:0006629 lipid metabolic process; GO:0006631 fatty acid metabolic process; GO:0006635 fatty acid beta-oxidation; GO:0006950 response to stress; GO:0008152 metabolic process; GO:0009056 catabolic process; GO:0009062 fatty acid catabolic process; GO:0009605 response to external stimulus; GO:0009719 response to endogenous stimulus; GO:0009725 response to …	GO:0005622 intracellular; GO:0005623 cell; GO:0005634 nucleus; GO:0005654 nucleoplasm; GO:0005737 cytoplasm; GO:0005739 mitochondrion; GO:0005740 mitochondrial envelope; GO:0005759 mitochondrial matrix; GO:0016020 membrane; GO:0031090 organelle membrane; GO:0031966 mitochondrial membrane; GO:0031967 organelle envelope; GO:0031974 membrane-enclosed lumen; GO:0031975 envelope; GO:0031981 nuclear lu…	GO:0000062 fatty-acyl-CoA binding; GO:0000166 nucleotide binding; GO:0003824 catalytic activity; GO:0003995 acyl-CoA dehydrogenase activity; GO:0004085 butyryl-CoA dehydrogenase activity; GO:0005488 binding; GO:0016491 oxidoreductase activity; GO:0016627 oxidoreductase activity, acting on the CH-CH group of donors; GO:0017076 purine nucleotide binding; GO:0030554 adenyl nucleotide binding; GO:003…	PF02771; PF02770; PF00441	Acyl-CoA dehydrogenase, N-terminal domain; Acyl-CoA dehydrogenase, middle domain; Acyl-CoA dehydrogenase, C-terminal domain	C	KOG0139	Short-chain acyl-CoA dehydrogenase
P48651	Phosphatidylserine synthase 1 OS=Homo sapiens OX=9606 GN=PTDSS1 PE=1 SV=1	PTDSS1	0.3095	1.50905e-05	Down	55.527	8.2	3	3	0.44372	0.471398	0.503033	1.46884	1.49514	1.61787	plasma membrane	K08729	PTDSS1; phosphatidylserine synthase 1 [EC:2.7.8.-]	hsa00564 Glycerophospholipid metabolism; hsa01100 Metabolic pathways	GO:0006575 cellular modified amino acid metabolic process; GO:0006629 lipid metabolic process; GO:0006644 phospholipid metabolic process; GO:0006650 glycerophospholipid metabolic process; GO:0006658 phosphatidylserine metabolic process; GO:0006659 phosphatidylserine biosynthetic process; GO:0006793 phosphorus metabolic process; GO:0006796 phosphate-containing compound metabolic process; GO:000680…	GO:0005622 intracellular; GO:0005623 cell; GO:0005737 cytoplasm; GO:0005783 endoplasmic reticulum; GO:0005789 endoplasmic reticulum membrane; GO:0012505 endomembrane system; GO:0016020 membrane; GO:0031984 organelle subcompartment; GO:0042175 nuclear outer membrane-endoplasmic reticulum membrane network; GO:0043226 organelle; GO:0043227 membrane-bounded organelle; GO:0043229 intracellular organel…	GO:0003824 catalytic activity; GO:0016740 transferase activity;			I	KOG2735	Phosphatidylserine synthase
Q86WA6	Valacyclovir hydrolase OS=Homo sapiens OX=9606 GN=BPHL PE=1 SV=1	BPHL	0.3102	2.65764e-05	Down	32.542	25.4	8	8	0.449686	0.52179	0.448905	1.54526	1.46537	1.56899	mitochondria	K18399			GO:0006082 organic acid metabolic process; GO:0006520 cellular amino acid metabolic process; GO:0006805 xenobiotic metabolic process; GO:0006807 nitrogen compound metabolic process; GO:0008152 metabolic process; GO:0009410 response to xenobiotic stimulus; GO:0009636 response to toxic substance; GO:0009987 cellular process; GO:0019752 carboxylic acid metabolic process; GO:0042221 response to chemi…	GO:0005622 intracellular; GO:0005623 cell; GO:0005737 cytoplasm; GO:0005739 mitochondrion; GO:0005740 mitochondrial envelope; GO:0005741 mitochondrial outer membrane; GO:0016020 membrane; GO:0019867 outer membrane; GO:0031090 organelle membrane; GO:0031966 mitochondrial membrane; GO:0031967 organelle envelope; GO:0031968 organelle outer membrane; GO:0031975 envelope; GO:0043226 organelle; GO:0043…	GO:0003824 catalytic activity; GO:0016787 hydrolase activity; GO:0016788 hydrolase activity, acting on ester bonds; GO:0047658 alpha-amino-acid esterase activity; GO:0052689 carboxylic ester hydrolase activity;	PF00561	alpha/beta hydrolase fold	S	KOG2984	Predicted hydrolase
P45954	Short/branched chain specific acyl-CoA dehydrogenase, mitochondrial OS=Homo sapiens OX=9606 GN=ACADSB PE=1 SV=1	ACADSB	0.3113	2.37761e-06	Down	47.485	21.1	6	6	0.489432	0.448068	0.486934	1.50569	1.5353	1.53458	mitochondria	K09478	ACADSB; short/branched chain acyl-CoA dehydrogenase [EC:1.3.99.12]	hsa00071 Fatty acid degradation; hsa00280 Valine, leucine and isoleucine degradation; hsa01212 Fatty acid metabolism; hsa01100 Metabolic pathways	GO:0006082 organic acid metabolic process; GO:0006091 generation of precursor metabolites and energy; GO:0006139 nucleobase-containing compound metabolic process; GO:0006163 purine nucleotide metabolic process; GO:0006520 cellular amino acid metabolic process; GO:0006629 lipid metabolic process; GO:0006631 fatty acid metabolic process; GO:0006635 fatty acid beta-oxidation; GO:0006637 acyl-CoA met…	GO:0005622 intracellular; GO:0005623 cell; GO:0005737 cytoplasm; GO:0005739 mitochondrion; GO:0005759 mitochondrial matrix; GO:0031974 membrane-enclosed lumen; GO:0043226 organelle; GO:0043227 membrane-bounded organelle; GO:0043229 intracellular organelle; GO:0043231 intracellular membrane-bounded organelle; GO:0043233 organelle lumen; GO:0070013 intracellular organelle lumen;	GO:0003824 catalytic activity; GO:0003995 acyl-CoA dehydrogenase activity; GO:0009055 electron transfer activity; GO:0016491 oxidoreductase activity; GO:0016627 oxidoreductase activity, acting on the CH-CH group of donors; GO:0016937 short-branched-chain-acyl-CoA dehydrogenase activity;	PF02771; PF02770; PF00441	Acyl-CoA dehydrogenase, N-terminal domain; Acyl-CoA dehydrogenase, middle domain; Acyl-CoA dehydrogenase, C-terminal domain	C	KOG0139	Short-chain acyl-CoA dehydrogenase
P63172	Dynein light chain Tctex-type 1 OS=Homo sapiens OX=9606 GN=DYNLT1 PE=1 SV=1	DYNLT1	0.3124	1.93018e-05	Down	12.452	60.2	4	4	0.523016	0.452333	0.452726	1.55808	1.50567	1.50818	cytoskeleton	K10420	DYNLT; dynein light chain Tctex-type 1	hsa05132 Salmonella infection	GO:0000132 establishment of mitotic spindle orientation; GO:0000226 microtubule cytoskeleton organization; GO:0000278 mitotic cell cycle; GO:0001775 cell activation; GO:0002252 immune effector process; GO:0002263 cell activation involved in immune response; GO:0002274 myeloid leukocyte activation; GO:0002275 myeloid cell activation involved in immune response; GO:0002283 neutrophil activation inv…	GO:0005576 extracellular region; GO:0005622 intracellular; GO:0005623 cell; GO:0005737 cytoplasm; GO:0005856 cytoskeleton; GO:0005868 cytoplasmic dynein complex; GO:0005874 microtubule; GO:0005875 microtubule associated complex; GO:0005881 cytoplasmic microtubule; GO:0012505 endomembrane system; GO:0015630 microtubule cytoskeleton; GO:0030141 secretory granule; GO:0030286 dynein complex; GO:00314…	GO:0005488 binding; GO:0005515 protein binding; GO:0042802 identical protein binding;			N	KOG4081	Dynein light chain
P00846	ATP synthase subunit a OS=Homo sapiens OX=9606 GN=MT-ATP6 PE=1 SV=1	MT-ATP6	0.3153	0.000175113	Down	24.817	8.4	2	2		0.406215	0.462333	1.36167	1.36612	1.40366	plasma membrane	K02126	ATPeF0A; F-type H+-transporting ATPase subunit a	hsa05016 Huntington disease; hsa00190 Oxidative phosphorylation; hsa05012 Parkinson disease; hsa05010 Alzheimer disease; hsa04714 Thermogenesis; hsa05022 Pathways of neurodegeneration - multiple diseases; hsa05014 Amyotrophic lateral sclerosis; hsa05020 Prion disease; hsa01100 Metabolic pathways	GO:0006091 generation of precursor metabolites and energy; GO:0006119 oxidative phosphorylation; GO:0006139 nucleobase-containing compound metabolic process; GO:0006163 purine nucleotide metabolic process; GO:0006164 purine nucleotide biosynthetic process; GO:0006725 cellular aromatic compound metabolic process; GO:0006753 nucleoside phosphate metabolic process; GO:0006754 ATP biosynthetic proces…	GO:0005622 intracellular; GO:0005623 cell; GO:0005737 cytoplasm; GO:0005739 mitochondrion; GO:0005740 mitochondrial envelope; GO:0005743 mitochondrial inner membrane; GO:0005753 mitochondrial proton-transporting ATP synthase complex; GO:0016020 membrane; GO:0016469 proton-transporting two-sector ATPase complex; GO:0019866 organelle inner membrane; GO:0031090 organelle membrane; GO:0031966 mitocho…	GO:0005215 transporter activity; GO:0022857 transmembrane transporter activity;	PF00119	ATP synthase A chain	C	KOG4665	ATP synthase F0 subunit 6 and related proteins
P22307	Non-specific lipid-transfer protein OS=Homo sapiens OX=9606 GN=SCP2 PE=1 SV=2	SCP2	0.3159	0.00574499	Down	58.993	10.4	6	6	0.66354	0.314065	0.462861	1.6782	1.45441	1.42692	cytoplasm	K08764	SCP2; sterol carrier protein 2 [EC:2.3.1.176]	hsa03320 PPAR signaling pathway; hsa00120 Primary bile acid biosynthesis; hsa01040 Biosynthesis of unsaturated fatty acids; hsa04146 Peroxisome; hsa01212 Fatty acid metabolism; hsa01100 Metabolic pathways	GO:0001676 long-chain fatty acid metabolic process; GO:0006066 alcohol metabolic process; GO:0006082 organic acid metabolic process; GO:0006605 protein targeting; GO:0006625 protein targeting to peroxisome; GO:0006629 lipid metabolic process; GO:0006631 fatty acid metabolic process; GO:0006635 fatty acid beta-oxidation; GO:0006694 steroid biosynthetic process; GO:0006699 bile acid biosynthetic pr…	GO:0005622 intracellular; GO:0005623 cell; GO:0005634 nucleus; GO:0005654 nucleoplasm; GO:0005737 cytoplasm; GO:0005777 peroxisome; GO:0005782 peroxisomal matrix; GO:0005829 cytosol; GO:0031907 microbody lumen; GO:0031974 membrane-enclosed lumen; GO:0031981 nuclear lumen; GO:0032991 protein-containing complex; GO:0042579 microbody; GO:0043226 organelle; GO:0043227 membrane-bounded organelle; GO:0…	GO:0000062 fatty-acyl-CoA binding; GO:0000166 nucleotide binding; GO:0003824 catalytic activity; GO:0005102 signaling receptor binding; GO:0005215 transporter activity; GO:0005319 lipid transporter activity; GO:0005488 binding; GO:0005496 steroid binding; GO:0005504 fatty acid binding; GO:0005515 protein binding; GO:0005548 phospholipid transporter activity; GO:0008289 lipid binding; GO:0008526 p…	PF00108; PF02803	Thiolase, N-terminal domain; Thiolase, C-terminal domain	I	KOG4170	2-enoyl-CoA hydratase/3-hydroxyacyl-CoA dehydrogenase/Peroxisomal 3-ketoacyl-CoA-thiolase, sterol-binding domain and related enzymes
Q9NRG7	Epimerase family protein SDR39U1 OS=Homo sapiens OX=9606 GN=SDR39U1 PE=1 SV=3	SDR39U1	0.3166	0.00157494	Down	31.076	24.2	6	6	0.452529	0.388153	0.602174	1.71423	1.29986	1.54306	mitochondria	K07071								F	KOG3019	Predicted nucleoside-diphosphate sugar epimerase
O60309	Leucine-rich repeat-containing protein 37A3 OS=Homo sapiens OX=9606 GN=LRRC37A3 PE=2 SV=2	LRRC37A3	0.3182	5.39279e-05	Down	180.62	17	20	2	0.491165	0.451853	0.505383	1.39648	1.48193	1.67318	plasma membrane									S	KOG0619	FOG: Leucine rich repeat
Q8NCW5	NAD(P)H-hydrate epimerase OS=Homo sapiens OX=9606 GN=NAXE PE=1 SV=2	NAXE	0.3185	0.000300338	Down	31.674	38.9	7	7	0.514932	0.539452	0.39501	1.53434	1.47329	1.54297	mitochondria	K17759			GO:0006139 nucleobase-containing compound metabolic process; GO:0006725 cellular aromatic compound metabolic process; GO:0006732 coenzyme metabolic process; GO:0006733 oxidoreduction coenzyme metabolic process; GO:0006734 NADH metabolic process; GO:0006739 NADP metabolic process; GO:0006753 nucleoside phosphate metabolic process; GO:0006793 phosphorus metabolic process; GO:0006796 phosphate-conta…	GO:0005576 extracellular region; GO:0005615 extracellular space; GO:0005622 intracellular; GO:0005623 cell; GO:0005634 nucleus; GO:0005654 nucleoplasm; GO:0005737 cytoplasm; GO:0005739 mitochondrion; GO:0005759 mitochondrial matrix; GO:0005829 cytosol; GO:0005929 cilium; GO:0031974 membrane-enclosed lumen; GO:0031981 nuclear lumen; GO:0042995 cell projection; GO:0043226 organelle; GO:0043227 memb…	GO:0003824 catalytic activity; GO:0005488 binding; GO:0005515 protein binding; GO:0016853 isomerase activity; GO:0016854 racemase and epimerase activity; GO:0042802 identical protein binding; GO:0042803 protein homodimerization activity; GO:0046983 protein dimerization activity; GO:0052856 NADHX epimerase activity; GO:0052857 NADPHX epimerase activity;	PF03853	YjeF-related protein N-terminus	G	KOG2585	Uncharacterized conserved protein
P05091	Aldehyde dehydrogenase, mitochondrial OS=Homo sapiens OX=9606 GN=ALDH2 PE=1 SV=2	ALDH2	0.3195	0.02012	Down	56.381	21.3	8	7		0.488406	0.38964	1.89505	1.1565	1.0704	mitochondria	K00128	ALDH; aldehyde dehydrogenase (NAD+) [EC:1.2.1.3]	hsa01240 Biosynthesis of cofactors; hsa00071 Fatty acid degradation; hsa00410 beta-Alanine metabolism; hsa00770 Pantothenate and CoA biosynthesis; hsa00620 Pyruvate metabolism; hsa00310 Lysine degradation; hsa00380 Tryptophan metabolism; hsa00010 Glycolysis / Gluconeogenesis; hsa00053 Ascorbate and aldarate metabolism; hsa00561 Glycerolipid metabolism; hsa00340 Histidine metabolism; hsa01100 Meta…	GO:0001101 response to acid chemical; GO:0001889 liver development; GO:0002237 response to molecule of bacterial origin; GO:0005975 carbohydrate metabolic process; GO:0006066 alcohol metabolic process; GO:0006067 ethanol metabolic process; GO:0006069 ethanol oxidation; GO:0006091 generation of precursor metabolites and energy; GO:0006950 response to stress; GO:0007275 multicellular organism devel…	GO:0005622 intracellular; GO:0005623 cell; GO:0005737 cytoplasm; GO:0005739 mitochondrion; GO:0005759 mitochondrial matrix; GO:0031974 membrane-enclosed lumen; GO:0043226 organelle; GO:0043227 membrane-bounded organelle; GO:0043229 intracellular organelle; GO:0043231 intracellular membrane-bounded organelle; GO:0043233 organelle lumen; GO:0070013 intracellular organelle lumen;	GO:0000166 nucleotide binding; GO:0003824 catalytic activity; GO:0004029 aldehyde dehydrogenase (NAD+) activity; GO:0004030 aldehyde dehydrogenase [NAD(P)+] activity; GO:0005488 binding; GO:0005515 protein binding; GO:0009055 electron transfer activity; GO:0016491 oxidoreductase activity; GO:0016620 oxidoreductase activity, acting on the aldehyde or oxo group of donors, NAD or NADP as acceptor; G…			C	KOG2450	Aldehyde dehydrogenase
O14638	Ectonucleotide pyrophosphatase/phosphodiesterase family member 3 OS=Homo sapiens OX=9606 GN=ENPP3 PE=1 SV=2	ENPP3	0.3197	6.39171e-05	Down	100.12	27.2	16	16	0.543351	0.465164	0.445011	1.53133	1.44264	1.5725	extracellular	K01513	ENPP1_3; ectonucleotide pyrophosphatase/phosphodiesterase family member 1/3 [EC:3.1.4.1 3.6.1.9]	hsa00770 Pantothenate and CoA biosynthesis; hsa00500 Starch and sucrose metabolism; hsa00740 Riboflavin metabolism; hsa00240 Pyrimidine metabolism; hsa00760 Nicotinate and nicotinamide metabolism; hsa00230 Purine metabolism; hsa01100 Metabolic pathways	GO:0001775 cell activation; GO:0002252 immune effector process; GO:0002263 cell activation involved in immune response; GO:0002274 myeloid leukocyte activation; GO:0002275 myeloid cell activation involved in immune response; GO:0002276 basophil activation involved in immune response; GO:0002366 leukocyte activation involved in immune response; GO:0002376 immune system process; GO:0002682 regulati…	GO:0005622 intracellular; GO:0005623 cell; GO:0005737 cytoplasm; GO:0005886 plasma membrane; GO:0009897 external side of plasma membrane; GO:0009986 cell surface; GO:0016020 membrane; GO:0048471 perinuclear region of cytoplasm; GO:0071944 cell periphery; GO:0098552 side of membrane;	GO:0003824 catalytic activity; GO:0004518 nuclease activity; GO:0004527 exonuclease activity; GO:0004528 phosphodiesterase I activity; GO:0004551 nucleotide diphosphatase activity; GO:0005488 binding; GO:0005509 calcium ion binding; GO:0008081 phosphoric diester hydrolase activity; GO:0008270 zinc ion binding; GO:0016462 pyrophosphatase activity; GO:0016787 hydrolase activity; GO:0016788 hydrolas…	PF01223	DNA/RNA non-specific endonuclease	S	KOG2645	Type I phosphodiesterase/nucleotide pyrophosphatase
P23435	Cerebellin-1 OS=Homo sapiens OX=9606 GN=CBLN1 PE=1 SV=1	CBLN1	0.3197	6.77988e-07	Down	21.097	28.5	4	4	0.467622	0.490596	0.495408	1.49726	1.54872	1.5004	extracellular	K24235			GO:0002790 peptide secretion; GO:0006810 transport; GO:0007154 cell communication; GO:0007155 cell adhesion; GO:0007157 heterophilic cell-cell adhesion via plasma membrane cell adhesion molecules; GO:0007267 cell-cell signaling; GO:0007268 chemical synaptic transmission; GO:0007275 multicellular organism development; GO:0007399 nervous system development; GO:0007417 central nervous system develop…	GO:0005576 extracellular region; GO:0005623 cell; GO:0005886 plasma membrane; GO:0016020 membrane; GO:0045202 synapse; GO:0045211 postsynaptic membrane; GO:0071944 cell periphery; GO:0097060 synaptic membrane; GO:0098590 plasma membrane region; GO:0098794 postsynapse;	GO:0005488 binding; GO:0005515 protein binding; GO:0042802 identical protein binding; GO:0042803 protein homodimerization activity; GO:0046983 protein dimerization activity;	PF00386	C1q domain
Q8IZ16	Uncharacterized protein C7orf61 OS=Homo sapiens OX=9606 GN=C7orf61 PE=2 SV=1	C7orf61	0.326	1.55913e-07	Down	23.862	47.6	7	7	0.491843	0.483019	0.500365	1.53741	1.50017	1.4872	mitochondria
Q02252	Methylmalonate-semialdehyde dehydrogenase [acylating], mitochondrial OS=Homo sapiens OX=9606 GN=ALDH6A1 PE=1 SV=2	ALDH6A1	0.3261	8.2641e-05	Down	57.839	15.1	5	5	0.552471	0.480657	0.44235	1.48412	1.46236	1.57805	mitochondria	K00140	mmsA; malonate-semialdehyde dehydrogenase (acetylating) / methylmalonate-semialdehyde dehydrogenase [EC:1.2.1.18 1.2.1.27]	hsa00640 Propanoate metabolism; hsa01200 Carbon metabolism; hsa00410 beta-Alanine metabolism; hsa00562 Inositol phosphate metabolism; hsa00280 Valine, leucine and isoleucine degradation; hsa01100 Metabolic pathways	GO:0001505 regulation of neurotransmitter levels; GO:0006082 organic acid metabolic process; GO:0006139 nucleobase-containing compound metabolic process; GO:0006206 pyrimidine nucleobase metabolic process; GO:0006208 pyrimidine nucleobase catabolic process; GO:0006210 thymine catabolic process; GO:0006520 cellular amino acid metabolic process; GO:0006573 valine metabolic process; GO:0006574 valin…	GO:0005622 intracellular; GO:0005623 cell; GO:0005634 nucleus; GO:0005654 nucleoplasm; GO:0005737 cytoplasm; GO:0005739 mitochondrion; GO:0005759 mitochondrial matrix; GO:0031974 membrane-enclosed lumen; GO:0031981 nuclear lumen; GO:0043226 organelle; GO:0043227 membrane-bounded organelle; GO:0043229 intracellular organelle; GO:0043231 intracellular membrane-bounded organelle; GO:0043233 organell…	GO:0000062 fatty-acyl-CoA binding; GO:0000166 nucleotide binding; GO:0003824 catalytic activity; GO:0004491 methylmalonate-semialdehyde dehydrogenase (acylating) activity; GO:0005488 binding; GO:0016491 oxidoreductase activity; GO:0016620 oxidoreductase activity, acting on the aldehyde or oxo group of donors, NAD or NADP as acceptor; GO:0016787 hydrolase activity; GO:0016788 hydrolase activity, a…			C	KOG2449	Methylmalonate semialdehyde dehydrogenase
Q92820	Gamma-glutamyl hydrolase OS=Homo sapiens OX=9606 GN=GGH PE=1 SV=2	GGH	0.3269	3.26115e-07	Down	35.964	37.1	12	12	0.48086	0.502097	0.495311	1.51282	1.53362	1.4753	extracellular	K01307	GGH; gamma-glutamyl hydrolase [EC:3.4.19.9]	hsa00790 Folate biosynthesis; hsa01240 Biosynthesis of cofactors; hsa01523 Antifolate resistance	GO:0001775 cell activation; GO:0002252 immune effector process; GO:0002263 cell activation involved in immune response; GO:0002274 myeloid leukocyte activation; GO:0002275 myeloid cell activation involved in immune response; GO:0002283 neutrophil activation involved in immune response; GO:0002366 leukocyte activation involved in immune response; GO:0002376 immune system process; GO:0002443 leukoc…	GO:0000323 lytic vacuole; GO:0005576 extracellular region; GO:0005615 extracellular space; GO:0005622 intracellular; GO:0005623 cell; GO:0005737 cytoplasm; GO:0005764 lysosome; GO:0005766 primary lysosome; GO:0005773 vacuole; GO:0005775 vacuolar lumen; GO:0005829 cytosol; GO:0012505 endomembrane system; GO:0030141 secretory granule; GO:0031410 cytoplasmic vesicle; GO:0031974 membrane-enclosed lum…	GO:0003824 catalytic activity; GO:0008233 peptidase activity; GO:0008238 exopeptidase activity; GO:0008242 omega peptidase activity; GO:0016787 hydrolase activity; GO:0034722 gamma-glutamyl-peptidase activity; GO:0070011 peptidase activity, acting on L-amino acid peptides; GO:0140096 catalytic activity, acting on a protein;	PF07722	Peptidase C26	H	KOG1559	Gamma-glutamyl hydrolase
Q8NHS2	Putative aspartate aminotransferase, cytoplasmic 2 OS=Homo sapiens OX=9606 GN=GOT1L1 PE=2 SV=2	GOT1L1	0.3291	6.36821e-05	Down	47.304	25.4	7	7	0.486659	0.529323	0.469622	1.63508	1.51677	1.36255	cytoplasm	K14454	GOT1; aspartate aminotransferase, cytoplasmic [EC:2.6.1.1]	hsa00270 Cysteine and methionine metabolism; hsa00250 Alanine, aspartate and glutamate metabolism; hsa00400 Phenylalanine, tyrosine and tryptophan biosynthesis; hsa00350 Tyrosine metabolism; hsa01210 2-Oxocarboxylic acid metabolism; hsa00360 Phenylalanine metabolism; hsa01200 Carbon metabolism; hsa00220 Arginine biosynthesis; hsa01230 Biosynthesis of amino acids; hsa01100 Metabolic pathways; hsa0…	GO:0006082 organic acid metabolic process; GO:0006520 cellular amino acid metabolic process; GO:0006531 aspartate metabolic process; GO:0006532 aspartate biosynthetic process; GO:0006807 nitrogen compound metabolic process; GO:0008152 metabolic process; GO:0008652 cellular amino acid biosynthetic process; GO:0009058 biosynthetic process; GO:0009066 aspartate family amino acid metabolic process; G…	GO:0005622 intracellular; GO:0005623 cell; GO:0005737 cytoplasm; GO:0005829 cytosol;	GO:0003824 catalytic activity; GO:0004069 L-aspartate:2-oxoglutarate aminotransferase activity; GO:0008483 transaminase activity; GO:0016740 transferase activity; GO:0016769 transferase activity, transferring nitrogenous groups;	PF00155	Aminotransferase class I and II	E	KOG1412	Aspartate aminotransferase/Glutamic oxaloacetic transaminase AAT2/GOT1
Q96HE7	ERO1-like protein alpha OS=Homo sapiens OX=9606 GN=ERO1A PE=1 SV=2	ERO1A	0.3294	5.03857e-05	Down	54.392	31.4	12	11	0.464723	0.523979	0.497952	1.48493	1.38702	1.6414	extracellular	K10950	ERO1L; ERO1-like protein alpha [EC:1.8.4.-]	hsa05110 Vibrio cholerae infection; hsa04141 Protein processing in endoplasmic reticulum	GO:0001666 response to hypoxia; GO:0006082 organic acid metabolic process; GO:0006457 protein folding; GO:0006458 'de novo' protein folding; GO:0006464 cellular protein modification process; GO:0006520 cellular amino acid metabolic process; GO:0006575 cellular modified amino acid metabolic process; GO:0006807 nitrogen compound metabolic process; GO:0006810 transport; GO:0006811 ion transport; GO:…	GO:0005622 intracellular; GO:0005623 cell; GO:0005737 cytoplasm; GO:0005783 endoplasmic reticulum; GO:0005788 endoplasmic reticulum lumen; GO:0005789 endoplasmic reticulum membrane; GO:0012505 endomembrane system; GO:0016020 membrane; GO:0016021 integral component of membrane; GO:0030176 integral component of endoplasmic reticulum membrane; GO:0030425 dendrite; GO:0031224 intrinsic component of m…	GO:0003756 protein disulfide isomerase activity; GO:0003824 catalytic activity; GO:0015035 protein disulfide oxidoreductase activity; GO:0015036 disulfide oxidoreductase activity; GO:0016491 oxidoreductase activity; GO:0016667 oxidoreductase activity, acting on a sulfur group of donors; GO:0016853 isomerase activity; GO:0016860 intramolecular oxidoreductase activity; GO:0016864 intramolecular oxi…			OU	KOG2608	Endoplasmic reticulum membrane-associated oxidoreductin involved in disulfide bond formation
O15143	Actin-related protein 2/3 complex subunit 1B OS=Homo sapiens OX=9606 GN=ARPC1B PE=1 SV=3	ARPC1B	0.3309	1.52638e-06	Down	40.949	45.2	13	11	0.509735	0.481786	0.500271	1.44935	1.51701	1.54185	cytoplasm	K05757	ARPC1A_B; actin related protein 2/3 complex, subunit 1A/1B	hsa04666 Fc gamma R-mediated phagocytosis; hsa04530 Tight junction; hsa05131 Shigellosis; hsa05100 Bacterial invasion of epithelial cells; hsa05132 Salmonella infection; hsa04810 Regulation of actin cytoskeleton; hsa05130 Pathogenic Escherichia coli infection; hsa04144 Endocytosis; hsa05135 Yersinia infection	GO:0002252 immune effector process; GO:0002253 activation of immune response; GO:0002376 immune system process; GO:0002429 immune response-activating cell surface receptor signaling pathway; GO:0002431 Fc receptor mediated stimulatory signaling pathway; GO:0002433 immune response-regulating cell surface receptor signaling pathway involved in phagocytosis; GO:0002682 regulation of immune system pr…	GO:0005622 intracellular; GO:0005623 cell; GO:0005737 cytoplasm; GO:0005829 cytosol; GO:0005856 cytoskeleton; GO:0005885 Arp2/3 protein complex; GO:0015629 actin cytoskeleton; GO:0032991 protein-containing complex; GO:0036284 tubulobulbar complex; GO:0043226 organelle; GO:0043228 non-membrane-bounded organelle; GO:0043229 intracellular organelle; GO:0043232 intracellular non-membrane-bounded orga…	GO:0003779 actin binding; GO:0005198 structural molecule activity; GO:0005200 structural constituent of cytoskeleton; GO:0005488 binding; GO:0005515 protein binding; GO:0008092 cytoskeletal protein binding; GO:0044877 protein-containing complex binding; GO:0051015 actin filament binding;			Z	KOG1523	Actin-related protein Arp2/3 complex, subunit ARPC1/p41-ARC
P15586	N-acetylglucosamine-6-sulfatase OS=Homo sapiens OX=9606 GN=GNS PE=1 SV=3	GNS	0.3313	4.85014e-07	Down	62.081	24.5	11	11	0.493069	0.4881	0.51188	1.53119	1.47036	1.5054	plasma membrane	K01137	GNS; N-acetylglucosamine-6-sulfatase [EC:3.1.6.14]	hsa00531 Glycosaminoglycan degradation; hsa04142 Lysosome; hsa01100 Metabolic pathways	GO:0001775 cell activation; GO:0002252 immune effector process; GO:0002263 cell activation involved in immune response; GO:0002274 myeloid leukocyte activation; GO:0002275 myeloid cell activation involved in immune response; GO:0002283 neutrophil activation involved in immune response; GO:0002366 leukocyte activation involved in immune response; GO:0002376 immune system process; GO:0002443 leukoc…	GO:0000323 lytic vacuole; GO:0005576 extracellular region; GO:0005622 intracellular; GO:0005623 cell; GO:0005737 cytoplasm; GO:0005764 lysosome; GO:0005766 primary lysosome; GO:0005773 vacuole; GO:0005775 vacuolar lumen; GO:0012505 endomembrane system; GO:0030141 secretory granule; GO:0031410 cytoplasmic vesicle; GO:0031974 membrane-enclosed lumen; GO:0031982 vesicle; GO:0031983 vesicle lumen; GO…	GO:0003824 catalytic activity; GO:0005488 binding; GO:0005539 glycosaminoglycan binding; GO:0008449 N-acetylglucosamine-6-sulfatase activity; GO:0008484 sulfuric ester hydrolase activity; GO:0016787 hydrolase activity; GO:0016788 hydrolase activity, acting on ester bonds; GO:0043167 ion binding; GO:0043168 anion binding; GO:0043199 sulfate binding; GO:0097367 carbohydrate derivative binding; GO:1…			G	KOG3731	Sulfatases
Q8N4L4	Spermatid maturation protein 1 OS=Homo sapiens OX=9606 GN=SPEM1 PE=2 SV=1	SPEM1	0.3323	0.00237573	Down	34.773	29.1	6	6	0.548092	0.352674	0.595856	1.43286	1.54685	1.52368	cytoplasm				GO:0000003 reproduction; GO:0003006 developmental process involved in reproduction; GO:0006928 movement of cell or subcellular component; GO:0007275 multicellular organism development; GO:0007276 gamete generation; GO:0007281 germ cell development; GO:0007283 spermatogenesis; GO:0007286 spermatid development; GO:0007291 sperm individualization; GO:0007349 cellularization; GO:0009653 anatomical st…	GO:0005622 intracellular; GO:0005623 cell; GO:0005737 cytoplasm;
Q01105	Protein SET OS=Homo sapiens OX=9606 GN=SET PE=1 SV=3	SET	0.3344	8.20808e-07	Down	33.488	22.8	5	5	0.500249	0.518233	0.485198	1.4723	1.51705	1.50697	nucleus	K11290			GO:0006139 nucleobase-containing compound metabolic process; GO:0006259 DNA metabolic process; GO:0006260 DNA replication; GO:0006323 DNA packaging; GO:0006325 chromatin organization; GO:0006333 chromatin assembly or disassembly; GO:0006334 nucleosome assembly; GO:0006337 nucleosome disassembly; GO:0006355 regulation of transcription, DNA-templated; GO:0006725 cellular aromatic compound metabolic…	GO:0005622 intracellular; GO:0005623 cell; GO:0005634 nucleus; GO:0005654 nucleoplasm; GO:0005737 cytoplasm; GO:0005783 endoplasmic reticulum; GO:0005811 lipid droplet; GO:0005829 cytosol; GO:0012505 endomembrane system; GO:0031974 membrane-enclosed lumen; GO:0031981 nuclear lumen; GO:0032991 protein-containing complex; GO:0043226 organelle; GO:0043227 membrane-bounded organelle; GO:0043228 non-m…	GO:0004857 enzyme inhibitor activity; GO:0004864 protein phosphatase inhibitor activity; GO:0005488 binding; GO:0005515 protein binding; GO:0019208 phosphatase regulator activity; GO:0019212 phosphatase inhibitor activity; GO:0019888 protein phosphatase regulator activity; GO:0030234 enzyme regulator activity; GO:0042393 histone binding; GO:0098772 molecular function regulator;			K	KOG1508	DNA replication factor/protein phosphatase inhibitor SET/SPR-2
O15511	Actin-related protein 2/3 complex subunit 5 OS=Homo sapiens OX=9606 GN=ARPC5 PE=1 SV=3	ARPC5	0.3345	3.49556e-06	Down	16.32	44.4	5	5	0.521879	0.509637	0.4723	1.48798	1.50429	1.50391	cytoplasm	K05754	ARPC5; actin related protein 2/3 complex, subunit 5	hsa04666 Fc gamma R-mediated phagocytosis; hsa04530 Tight junction; hsa05131 Shigellosis; hsa05100 Bacterial invasion of epithelial cells; hsa05132 Salmonella infection; hsa04810 Regulation of actin cytoskeleton; hsa05130 Pathogenic Escherichia coli infection; hsa04144 Endocytosis; hsa05135 Yersinia infection	GO:0001775 cell activation; GO:0002252 immune effector process; GO:0002253 activation of immune response; GO:0002263 cell activation involved in immune response; GO:0002274 myeloid leukocyte activation; GO:0002275 myeloid cell activation involved in immune response; GO:0002283 neutrophil activation involved in immune response; GO:0002366 leukocyte activation involved in immune response; GO:000237…	GO:0005576 extracellular region; GO:0005622 intracellular; GO:0005623 cell; GO:0005737 cytoplasm; GO:0005768 endosome; GO:0005829 cytosol; GO:0005856 cytoskeleton; GO:0005885 Arp2/3 protein complex; GO:0012505 endomembrane system; GO:0015629 actin cytoskeleton; GO:0030027 lamellipodium; GO:0030141 secretory granule; GO:0030424 axon; GO:0030426 growth cone; GO:0030427 site of polarized growth; GO:…	GO:0003779 actin binding; GO:0005198 structural molecule activity; GO:0005200 structural constituent of cytoskeleton; GO:0005488 binding; GO:0005515 protein binding; GO:0008092 cytoskeletal protein binding; GO:0044877 protein-containing complex binding; GO:0051015 actin filament binding;	PF04699	ARP2/3 complex 16 kDa subunit (p16-Arc)	Z	KOG3380	Actin-related protein Arp2/3 complex, subunit ARPC5
P10323	Acrosin OS=Homo sapiens OX=9606 GN=ACR PE=1 SV=4	ACR	0.3345	1.14798e-07	Down	45.846	58.7	19	19	0.493727	0.499701	0.510518	1.49629	1.52157	1.47819	extracellular	K01317			GO:0000003 reproduction; GO:0002077 acrosome matrix dispersal; GO:0006508 proteolysis; GO:0006807 nitrogen compound metabolic process; GO:0007190 activation of adenylate cyclase activity; GO:0007338 single fertilization; GO:0007339 binding of sperm to zona pellucida; GO:0007340 acrosome reaction; GO:0007341 penetration of zona pellucida; GO:0008037 cell recognition; GO:0008152 metabolic process; …	GO:0001669 acrosomal vesicle; GO:0005576 extracellular region; GO:0005622 intracellular; GO:0005623 cell; GO:0005737 cytoplasm; GO:0005773 vacuole; GO:0005798 Golgi-associated vesicle; GO:0012505 endomembrane system; GO:0030141 secretory granule; GO:0031410 cytoplasmic vesicle; GO:0031982 vesicle; GO:0032991 protein-containing complex; GO:0043159 acrosomal matrix; GO:0043226 organelle; GO:0043227…	GO:0002020 protease binding; GO:0003676 nucleic acid binding; GO:0003677 DNA binding; GO:0003824 catalytic activity; GO:0004040 amidase activity; GO:0004175 endopeptidase activity; GO:0004252 serine-type endopeptidase activity; GO:0005488 binding; GO:0005507 copper ion binding; GO:0005515 protein binding; GO:0005537 mannose binding; GO:0008144 drug binding; GO:0008233 peptidase activity; GO:00082…	PF00089	Trypsin	O	KOG3627	Trypsin
P09960	Leukotriene A-4 hydrolase OS=Homo sapiens OX=9606 GN=LTA4H PE=1 SV=2	LTA4H	0.3363	5.10075e-08	Down	69.284	51.9	23	23	0.50074	0.496126	0.513175	1.50327	1.49785	1.48883	cytoplasm	K01254	LTA4H; leukotriene-A4 hydrolase [EC:3.3.2.6]	hsa00590 Arachidonic acid metabolism; hsa01100 Metabolic pathways	GO:0001676 long-chain fatty acid metabolic process; GO:0001775 cell activation; GO:0002252 immune effector process; GO:0002263 cell activation involved in immune response; GO:0002274 myeloid leukocyte activation; GO:0002275 myeloid cell activation involved in immune response; GO:0002283 neutrophil activation involved in immune response; GO:0002366 leukocyte activation involved in immune response;…	GO:0005576 extracellular region; GO:0005622 intracellular; GO:0005623 cell; GO:0005634 nucleus; GO:0005654 nucleoplasm; GO:0005737 cytoplasm; GO:0005829 cytosol; GO:0012505 endomembrane system; GO:0030141 secretory granule; GO:0031410 cytoplasmic vesicle; GO:0031974 membrane-enclosed lumen; GO:0031981 nuclear lumen; GO:0031982 vesicle; GO:0043226 organelle; GO:0043227 membrane-bounded organelle; …	GO:0003824 catalytic activity; GO:0004177 aminopeptidase activity; GO:0004301 epoxide hydrolase activity; GO:0004463 leukotriene-A4 hydrolase activity; GO:0005488 binding; GO:0008233 peptidase activity; GO:0008235 metalloexopeptidase activity; GO:0008237 metallopeptidase activity; GO:0008238 exopeptidase activity; GO:0008270 zinc ion binding; GO:0016787 hydrolase activity; GO:0016801 hydrolase ac…	PF01433	Peptidase family M1	EIOV	KOG1047	Bifunctional leukotriene A4 hydrolase/aminopeptidase LTA4H
P0DP25	Calmodulin-3 OS=Homo sapiens OX=9606 GN=CALM3 PE=1 SV=1	CALM3	0.3374	1.26316e-06	Down	16.837	57.7	9	7	0.49754	0.50871	0.507434	1.45734	1.56231	1.46666	cytoplasm,nucleus	K02183	CALM; calmodulin	hsa04014 Ras signaling pathway; hsa04270 Vascular smooth muscle contraction; hsa05200 Pathways in cancer [Cancer network viewer]; hsa04371 Apelin signaling pathway; hsa04261 Adrenergic signaling in cardiomyocytes; hsa05012 Parkinson disease; hsa05022 Pathways of neurodegeneration - multiple diseases; hsa04744 Phototransduction; hsa05034 Alcoholism; hsa04971 Gastric acid secretion; hsa04915 Estrog…	GO:0006873 cellular ion homeostasis; GO:0006874 cellular calcium ion homeostasis; GO:0006875 cellular metal ion homeostasis; GO:0007204 positive regulation of cytosolic calcium ion concentration; GO:0009966 regulation of signal transduction; GO:0009967 positive regulation of signal transduction; GO:0009968 negative regulation of signal transduction; GO:0009987 cellular process; GO:0010522 regulat…	GO:0000922 spindle pole; GO:0005622 intracellular; GO:0005623 cell; GO:0005737 cytoplasm; GO:0005819 spindle; GO:0005829 cytosol; GO:0005856 cytoskeleton; GO:0015630 microtubule cytoskeleton; GO:0032991 protein-containing complex; GO:0043226 organelle; GO:0043228 non-membrane-bounded organelle; GO:0043229 intracellular organelle; GO:0043232 intracellular non-membrane-bounded organelle;	GO:0005488 binding; GO:0005509 calcium ion binding; GO:0005515 protein binding; GO:0019904 protein domain specific binding; GO:0043167 ion binding; GO:0043169 cation binding; GO:0046872 metal ion binding;	PF13499	EF-hand domain pair	T	KOG0027	Calmodulin and related proteins (EF-Hand superfamily)
Q8TC99	Fibronectin type III domain-containing protein 8 OS=Homo sapiens OX=9606 GN=FNDC8 PE=1 SV=2	FNDC8	0.3379	7.26978e-06	Down	35.921	25.9	6	6	0.524633	0.4867	0.504158	1.41166	1.52103	1.55182	cytoplasm	K24488						PF00041	Fibronectin type III domain
Q7L5N7	Lysophosphatidylcholine acyltransferase 2 OS=Homo sapiens OX=9606 GN=LPCAT2 PE=1 SV=1	LPCAT2	0.3384	1.41549e-06	Down	60.207	17.5	6	6	0.520464	0.506552	0.490067	1.52231	1.44594	1.51466	mitochondria	K13510	LPCAT1_2; lysophosphatidylcholine acyltransferase / lyso-PAF acetyltransferase [EC:2.3.1.23 2.3.1.67]	hsa00565 Ether lipid metabolism; hsa00564 Glycerophospholipid metabolism; hsa01100 Metabolic pathways	GO:0006629 lipid metabolic process; GO:0006644 phospholipid metabolic process; GO:0006650 glycerophospholipid metabolic process; GO:0006663 platelet activating factor biosynthetic process; GO:0006793 phosphorus metabolic process; GO:0006796 phosphate-containing compound metabolic process; GO:0006807 nitrogen compound metabolic process; GO:0008152 metabolic process; GO:0008610 lipid biosynthetic p…	GO:0005622 intracellular; GO:0005623 cell; GO:0005737 cytoplasm; GO:0005783 endoplasmic reticulum; GO:0005789 endoplasmic reticulum membrane; GO:0005794 Golgi apparatus; GO:0005795 Golgi stack; GO:0005811 lipid droplet; GO:0012505 endomembrane system; GO:0016020 membrane; GO:0031984 organelle subcompartment; GO:0042175 nuclear outer membrane-endoplasmic reticulum membrane network; GO:0043226 orga…	GO:0003824 catalytic activity; GO:0003841 1-acylglycerol-3-phosphate O-acyltransferase activity; GO:0008374 O-acyltransferase activity; GO:0016407 acetyltransferase activity; GO:0016411 acylglycerol O-acyltransferase activity; GO:0016413 O-acetyltransferase activity; GO:0016740 transferase activity; GO:0016746 transferase activity, transferring acyl groups; GO:0016747 transferase activity, transf…	PF13499	EF-hand domain pair	I	KOG4666	Predicted phosphate acyltransferase, contains PlsC domain
Q08830	Fibrinogen-like protein 1 OS=Homo sapiens OX=9606 GN=FGL1 PE=1 SV=3	FGL1	0.3398	6.92521e-06	Down	36.379	29.5	7	7	0.482621	0.536343	0.502798	1.48917	1.44877	1.5403	extracellular				GO:0006066 alcohol metabolic process; GO:0006109 regulation of carbohydrate metabolic process; GO:0006629 lipid metabolic process; GO:0007275 multicellular organism development; GO:0008152 metabolic process; GO:0008202 steroid metabolic process; GO:0008203 cholesterol metabolic process; GO:0009888 tissue development; GO:0010033 response to organic substance; GO:0010675 regulation of cellular carb…	GO:0005576 extracellular region; GO:0005577 fibrinogen complex; GO:0005615 extracellular space; GO:0032991 protein-containing complex;		PF00147	Fibrinogen beta and gamma chains, C-terminal globular domain	S	KOG2579	Ficolin and related extracellular proteins
Q5JRX3	Presequence protease, mitochondrial OS=Homo sapiens OX=9606 GN=PITRM1 PE=1 SV=3	PITRM1	0.3447	2.27306e-07	Down	117.41	54.1	42	42	0.518534	0.510263	0.509087	1.44932	1.51863	1.49416	mitochondria	K06972			GO:0006508 proteolysis; GO:0006605 protein targeting; GO:0006626 protein targeting to mitochondrion; GO:0006807 nitrogen compound metabolic process; GO:0006810 transport; GO:0006839 mitochondrial transport; GO:0006886 intracellular protein transport; GO:0006996 organelle organization; GO:0007005 mitochondrion organization; GO:0008104 protein localization; GO:0008152 metabolic process; GO:0009987 …	GO:0005622 intracellular; GO:0005623 cell; GO:0005737 cytoplasm; GO:0005739 mitochondrion; GO:0005759 mitochondrial matrix; GO:0031974 membrane-enclosed lumen; GO:0043226 organelle; GO:0043227 membrane-bounded organelle; GO:0043229 intracellular organelle; GO:0043231 intracellular membrane-bounded organelle; GO:0043233 organelle lumen; GO:0070013 intracellular organelle lumen;	GO:0003824 catalytic activity; GO:0004175 endopeptidase activity; GO:0004222 metalloendopeptidase activity; GO:0005488 binding; GO:0008047 enzyme activator activity; GO:0008233 peptidase activity; GO:0008237 metallopeptidase activity; GO:0008270 zinc ion binding; GO:0016787 hydrolase activity; GO:0030234 enzyme regulator activity; GO:0043167 ion binding; GO:0043169 cation binding; GO:0046872 meta…	PF05193	Peptidase M16 inactive domain	O	KOG2019	Metalloendoprotease HMP1 (insulinase superfamily)
Q7Z6W1	Transmembrane and coiled-coil domain-containing protein 2 OS=Homo sapiens OX=9606 GN=TMCO2 PE=1 SV=1	TMCO2	0.3449	2.44271e-06	Down	20.071	26.4	4	4	0.519682	0.513187	0.505873	1.49279	1.41833	1.55014	cytoplasm
Q8WUK0	Phosphatidylglycerophosphatase and protein-tyrosine phosphatase 1 OS=Homo sapiens OX=9606 GN=PTPMT1 PE=1 SV=1	PTPMT1	0.3449	3.04883e-06	Down	22.843	56.2	10	10	0.488406	0.532021	0.518369	1.47817	1.45876	1.52427	mitochondria	K14165			GO:0002791 regulation of peptide secretion; GO:0002792 negative regulation of peptide secretion; GO:0006629 lipid metabolic process; GO:0006644 phospholipid metabolic process; GO:0006650 glycerophospholipid metabolic process; GO:0006655 phosphatidylglycerol biosynthetic process; GO:0006793 phosphorus metabolic process; GO:0006796 phosphate-containing compound metabolic process; GO:0008152 metabol…	GO:0005622 intracellular; GO:0005623 cell; GO:0005737 cytoplasm; GO:0005739 mitochondrion; GO:0005740 mitochondrial envelope; GO:0005743 mitochondrial inner membrane; GO:0016020 membrane; GO:0016021 integral component of membrane; GO:0019866 organelle inner membrane; GO:0031090 organelle membrane; GO:0031224 intrinsic component of membrane; GO:0031300 intrinsic component of organelle membrane; GO…	GO:0003824 catalytic activity; GO:0004439 phosphatidylinositol-4,5-bisphosphate 5-phosphatase activity; GO:0008962 phosphatidylglycerophosphatase activity; GO:0016787 hydrolase activity; GO:0016788 hydrolase activity, acting on ester bonds; GO:0016791 phosphatase activity; GO:0034593 phosphatidylinositol bisphosphate phosphatase activity; GO:0034595 phosphatidylinositol phosphate 5-phosphatase ac…	PF00782	Dual specificity phosphatase, catalytic domain	V	KOG1719	Dual specificity phosphatase
Q53S33	BolA-like protein 3 OS=Homo sapiens OX=9606 GN=BOLA3 PE=1 SV=1	BOLA3	0.3452	0.00217347	Down	12.114	26.2	2	2	0.562716	0.569938	0.406957	1.51579	1.21182	1.73279	mitochondria	K22075			GO:0006355 regulation of transcription, DNA-templated; GO:0006357 regulation of transcription by RNA polymerase II; GO:0009889 regulation of biosynthetic process; GO:0010468 regulation of gene expression; GO:0010556 regulation of macromolecule biosynthetic process; GO:0019219 regulation of nucleobase-containing compound metabolic process; GO:0019222 regulation of metabolic process; GO:0031323 reg…	GO:0005622 intracellular; GO:0005623 cell; GO:0005737 cytoplasm; GO:0005739 mitochondrion; GO:0043226 organelle; GO:0043227 membrane-bounded organelle; GO:0043229 intracellular organelle; GO:0043231 intracellular membrane-bounded organelle;	GO:0000981 DNA-binding transcription factor activity, RNA polymerase II-specific; GO:0003700 DNA-binding transcription factor activity; GO:0140110 transcription regulator activity;			K	KOG3348	BolA (bacterial stress-induced morphogen)-related protein
Q5TEZ5	Uncharacterized protein C6orf163 OS=Homo sapiens OX=9606 GN=C6orf163 PE=4 SV=2	C6orf163	0.3453	3.07152e-05	Down	38.553	27.7	8	8	0.506691	0.484526	0.548906	1.38433	1.54942	1.52612	cytoplasm
Q14141	Septin-6 OS=Homo sapiens OX=9606 GN=SEPTIN6 PE=1 SV=4	SEPTIN6	0.3465	7.62175e-05	Down	49.716	29.3	9	6	0.555691	0.45194	0.536407	1.48045	1.49421	1.4813	cytoplasm	K16939	SEPT6_8_11; septin 6/8/11	hsa05100 Bacterial invasion of epithelial cells; hsa05131 Shigellosis	GO:0000278 mitotic cell cycle; GO:0000281 mitotic cytokinesis; GO:0000910 cytokinesis; GO:0007049 cell cycle; GO:0009987 cellular process; GO:0022402 cell cycle process; GO:0051301 cell division; GO:0061640 cytoskeleton-dependent cytokinesis; GO:1903047 mitotic cell cycle process;	GO:0005622 intracellular; GO:0005623 cell; GO:0005737 cytoplasm; GO:0005856 cytoskeleton; GO:0005886 plasma membrane; GO:0005929 cilium; GO:0005938 cell cortex; GO:0005940 septin ring; GO:0008021 synaptic vesicle; GO:0012505 endomembrane system; GO:0016020 membrane; GO:0030133 transport vesicle; GO:0030424 axon; GO:0031105 septin complex; GO:0031410 cytoplasmic vesicle; GO:0031514 motile cilium; …	GO:0000166 nucleotide binding; GO:0001882 nucleoside binding; GO:0001883 purine nucleoside binding; GO:0005488 binding; GO:0005525 GTP binding; GO:0017076 purine nucleotide binding; GO:0019001 guanyl nucleotide binding; GO:0032549 ribonucleoside binding; GO:0032550 purine ribonucleoside binding; GO:0032553 ribonucleotide binding; GO:0032555 purine ribonucleotide binding; GO:0032561 guanyl ribonuc…	PF00735	Septin	D	KOG3859	Septins (P-loop GTPases)
Q5CZC0	Fibrous sheath-interacting protein 2 OS=Homo sapiens OX=9606 GN=FSIP2 PE=2 SV=4	FSIP2	0.3467	1.29705e-06	Down	780.6	18.8	94	94	0.520937	0.517971	0.505879	1.4234	1.51849	1.51332	cytoplasm					GO:0005622 intracellular; GO:0005623 cell; GO:0005737 cytoplasm; GO:0005739 mitochondrion; GO:0005929 cilium; GO:0031514 motile cilium; GO:0042995 cell projection; GO:0043226 organelle; GO:0043227 membrane-bounded organelle; GO:0043229 intracellular organelle; GO:0043231 intracellular membrane-bounded organelle; GO:0120025 plasma membrane bounded cell projection;
Q16822	Phosphoenolpyruvate carboxykinase [GTP], mitochondrial OS=Homo sapiens OX=9606 GN=PCK2 PE=1 SV=4	PCK2	0.3504	0.0147723	Down	70.698	19.8	10	10	0.299222	0.504363	0.753435	1.34381	1.53812	1.56106	mitochondria	K01596	E4.1.1.32; phosphoenolpyruvate carboxykinase (GTP) [EC:4.1.1.32]	hsa03320 PPAR signaling pathway; hsa00020 Citrate cycle (TCA cycle); hsa04922 Glucagon signaling pathway; hsa00620 Pyruvate metabolism; hsa00010 Glycolysis / Gluconeogenesis; hsa04151 PI3K-Akt signaling pathway; hsa04920 Adipocytokine signaling pathway; hsa04964 Proximal tubule bicarbonate reclamation; hsa04910 Insulin signaling pathway; hsa04068 FoxO signaling pathway; hsa01100 Metabolic pathway…	GO:0002791 regulation of peptide secretion; GO:0002793 positive regulation of peptide secretion; GO:0005975 carbohydrate metabolic process; GO:0005996 monosaccharide metabolic process; GO:0006006 glucose metabolic process; GO:0006082 organic acid metabolic process; GO:0006090 pyruvate metabolic process; GO:0006094 gluconeogenesis; GO:0006107 oxaloacetate metabolic process; GO:0006116 NADH oxidati…	GO:0005622 intracellular; GO:0005623 cell; GO:0005737 cytoplasm; GO:0005739 mitochondrion; GO:0005759 mitochondrial matrix; GO:0031974 membrane-enclosed lumen; GO:0043226 organelle; GO:0043227 membrane-bounded organelle; GO:0043229 intracellular organelle; GO:0043231 intracellular membrane-bounded organelle; GO:0043233 organelle lumen; GO:0070013 intracellular organelle lumen;	GO:0003824 catalytic activity; GO:0004611 phosphoenolpyruvate carboxykinase activity; GO:0004613 phosphoenolpyruvate carboxykinase (GTP) activity; GO:0016829 lyase activity; GO:0016830 carbon-carbon lyase activity; GO:0016831 carboxy-lyase activity;	PF00821	Phosphoenolpyruvate carboxykinase	C	KOG3749	Phosphoenolpyruvate carboxykinase
P0C7M6	IQ domain-containing protein F3 OS=Homo sapiens OX=9606 GN=IQCF3 PE=1 SV=1	IQCF3	0.3506	2.76334e-05	Down	18.25	31.8	5	5	0.51957	0.515589	0.522507	1.34203	1.53296	1.56735	cytoplasm,mitochondria						GO:0005488 binding; GO:0005515 protein binding; GO:0005516 calmodulin binding;
P30405	Peptidyl-prolyl cis-trans isomerase F, mitochondrial OS=Homo sapiens OX=9606 GN=PPIF PE=1 SV=1	PPIF	0.3508	7.7696e-05	Down	22.04	49.3	6	6	0.531116	0.567873	0.459289	1.45521	1.5068	1.47971	mitochondria	K09565	PPIF; peptidyl-prolyl isomerase F (cyclophilin D) [EC:5.2.1.8]	hsa05017 Spinocerebellar ataxia; hsa05016 Huntington disease; hsa04020 Calcium signaling pathway; hsa05012 Parkinson disease; hsa05010 Alzheimer disease; hsa05145 Toxoplasmosis; hsa05022 Pathways of neurodegeneration - multiple diseases; hsa05020 Prion disease; hsa04022 cGMP-PKG signaling pathway	GO:0000302 response to reactive oxygen species; GO:0000413 protein peptidyl-prolyl isomerization; GO:0002082 regulation of oxidative phosphorylation; GO:0002931 response to ischemia; GO:0006140 regulation of nucleotide metabolic process; GO:0006464 cellular protein modification process; GO:0006807 nitrogen compound metabolic process; GO:0006810 transport; GO:0006839 mitochondrial transport; GO:00…	GO:0005622 intracellular; GO:0005623 cell; GO:0005737 cytoplasm; GO:0005739 mitochondrion; GO:0005740 mitochondrial envelope; GO:0005743 mitochondrial inner membrane; GO:0005757 mitochondrial permeability transition pore complex; GO:0005759 mitochondrial matrix; GO:0016020 membrane; GO:0016021 integral component of membrane; GO:0019866 organelle inner membrane; GO:0031090 organelle membrane; GO:0…	GO:0003755 peptidyl-prolyl cis-trans isomerase activity; GO:0003824 catalytic activity; GO:0005488 binding; GO:0008144 drug binding; GO:0016018 cyclosporin A binding; GO:0016853 isomerase activity; GO:0016859 cis-trans isomerase activity; GO:0033218 amide binding; GO:0042277 peptide binding; GO:0140096 catalytic activity, acting on a protein;	PF00160	Cyclophilin type peptidyl-prolyl cis-trans isomerase/CLD	O	KOG0865	Cyclophilin type peptidyl-prolyl cis-trans isomerase
P12429	Annexin A3 OS=Homo sapiens OX=9606 GN=ANXA3 PE=1 SV=3	ANXA3	0.3519	3.98581e-07	Down	36.375	57.9	17	17	0.506951	0.518236	0.536557	1.4802	1.47155	1.48651	cytoplasm	K17089			GO:0001775 cell activation; GO:0002252 immune effector process; GO:0002263 cell activation involved in immune response; GO:0002274 myeloid leukocyte activation; GO:0002275 myeloid cell activation involved in immune response; GO:0002283 neutrophil activation involved in immune response; GO:0002366 leukocyte activation involved in immune response; GO:0002376 immune system process; GO:0002443 leukoc…	GO:0005622 intracellular; GO:0005623 cell; GO:0005737 cytoplasm; GO:0005829 cytosol; GO:0005886 plasma membrane; GO:0012505 endomembrane system; GO:0012506 vesicle membrane; GO:0016020 membrane; GO:0030139 endocytic vesicle; GO:0030141 secretory granule; GO:0030424 axon; GO:0030425 dendrite; GO:0030659 cytoplasmic vesicle membrane; GO:0030666 endocytic vesicle membrane; GO:0030670 phagocytic vesi…	GO:0004857 enzyme inhibitor activity; GO:0004859 phospholipase inhibitor activity; GO:0005488 binding; GO:0005515 protein binding; GO:0005543 phospholipid binding; GO:0005544 calcium-dependent phospholipid binding; GO:0008289 lipid binding; GO:0019834 phospholipase A2 inhibitor activity; GO:0030234 enzyme regulator activity; GO:0043167 ion binding; GO:0043168 anion binding; GO:0048306 calcium-dep…			U	KOG0819	Annexin
Q6P2C0	WD repeat-containing protein 93 OS=Homo sapiens OX=9606 GN=WDR93 PE=2 SV=1	WDR93	0.3532	3.57642e-05	Down	77.377	13.3	6	6	0.561144	0.479532	0.525263	1.47658	1.41613	1.54135	nucleus
Q8TDY3	Actin-related protein T2 OS=Homo sapiens OX=9606 GN=ACTRT2 PE=2 SV=2	ACTRT2	0.3536	2.85697e-08	Down	41.701	46.4	15	15	0.529042	0.520283	0.518204	1.489	1.46056	1.4829	cytoplasm									Z	KOG0676	Actin and related proteins
Q5TEA6	Protein sel-1 homolog 2 OS=Homo sapiens OX=9606 GN=SEL1L2 PE=2 SV=2	SEL1L2	0.355	0.000308999	Down	77.963	16	8	8	0.440239	0.596111	0.535565	1.4551	1.50899	1.46399	endoplasmic reticulum	K14026	SEL1; SEL1 protein	hsa04141 Protein processing in endoplasmic reticulum		GO:0016020 membrane;				MOT	KOG1550	Extracellular protein SEL-1 and related proteins
P01903	HLA class II histocompatibility antigen, DR alpha chain OS=Homo sapiens OX=9606 GN=HLA-DRA PE=1 SV=1	HLA-DRA	0.3568	7.04091e-07	Down	28.607	22.4	4	3	0.513577	0.535248	0.528937	1.43476	1.47879	1.50869	extracellular	K06752	MHC2; MHC class II antigen	hsa05166 Human T-cell leukemia virus 1 infection; hsa05169 Epstein-Barr virus infection; hsa05322 Systemic lupus erythematosus; hsa05330 Allograft rejection; hsa05332 Graft-versus-host disease; hsa05416 Viral myocarditis; hsa05168 Herpes simplex virus 1 infection; hsa05310 Asthma; hsa05321 Inflammatory bowel disease; hsa05145 Toxoplasmosis; hsa04514 Cell adhesion molecules; hsa05323 Rheumatoid ar…	GO:0002253 activation of immune response; GO:0002376 immune system process; GO:0002396 MHC protein complex assembly; GO:0002399 MHC class II protein complex assembly; GO:0002429 immune response-activating cell surface receptor signaling pathway; GO:0002478 antigen processing and presentation of exogenous peptide antigen; GO:0002495 antigen processing and presentation of peptide antigen via MHC cl…	GO:0000139 Golgi membrane; GO:0000323 lytic vacuole; GO:0005622 intracellular; GO:0005623 cell; GO:0005737 cytoplasm; GO:0005764 lysosome; GO:0005765 lysosomal membrane; GO:0005768 endosome; GO:0005770 late endosome; GO:0005773 vacuole; GO:0005774 vacuolar membrane; GO:0005783 endoplasmic reticulum; GO:0005789 endoplasmic reticulum membrane; GO:0005794 Golgi apparatus; GO:0005798 Golgi-associated…	GO:0003823 antigen binding; GO:0004888 transmembrane signaling receptor activity; GO:0005488 binding; GO:0032395 MHC class II receptor activity; GO:0033218 amide binding; GO:0038023 signaling receptor activity; GO:0042277 peptide binding; GO:0042605 peptide antigen binding; GO:0060089 molecular transducer activity;	PF00993; PF07654	Class II histocompatibility antigen, alpha domain; Immunoglobulin C1-set domain
A8MYZ5	IQ domain-containing protein F6 OS=Homo sapiens OX=9606 GN=IQCF6 PE=4 SV=3	IQCF6	0.3603	6.73976e-06	Down	13.059	36.4	4	4	0.52708	0.51367	0.548397	1.5372	1.47487	1.39879	mitochondria						GO:0005488 binding; GO:0005515 protein binding; GO:0005516 calmodulin binding;
B1ANS9	WD repeat-containing protein 64 OS=Homo sapiens OX=9606 GN=WDR64 PE=2 SV=1	WDR64	0.361	3.78241e-06	Down	123.63	27.2	24	24	0.523242	0.558572	0.509603	1.45106	1.49585	1.46168	cytoplasm,nucleus									D	KOG0642	Cell-cycle nuclear protein, contains WD-40 repeats
A0A1B0GTY4	Testis-expressed protein 50 OS=Homo sapiens OX=9606 GN=TEX50 PE=3 SV=1	TEX50	0.3611	2.99651e-05	Down	20.846	35	4	4	0.485122	0.570607	0.536095	1.49749	1.46681	1.44388	extracellular
Q96KX2	F-actin-capping protein subunit alpha-3 OS=Homo sapiens OX=9606 GN=CAPZA3 PE=1 SV=2	CAPZA3	0.3632	3.13107e-07	Down	35.024	59.2	15	15	0.52884	0.531309	0.538527	1.42911	1.47082	1.5014	cytoplasm	K10364	CAPZA; capping protein (actin filament) muscle Z-line, alpha	hsa04144 Endocytosis	GO:0000003 reproduction; GO:0002376 immune system process; GO:0002478 antigen processing and presentation of exogenous peptide antigen; GO:0002495 antigen processing and presentation of peptide antigen via MHC class II; GO:0002504 antigen processing and presentation of peptide or polysaccharide antigen via MHC class II; GO:0003006 developmental process involved in reproduction; GO:0006810 transpo…	GO:0001669 acrosomal vesicle; GO:0005622 intracellular; GO:0005623 cell; GO:0005737 cytoplasm; GO:0005829 cytosol; GO:0005856 cytoskeleton; GO:0005938 cell cortex; GO:0012505 endomembrane system; GO:0016020 membrane; GO:0030141 secretory granule; GO:0030863 cortical cytoskeleton; GO:0031410 cytoplasmic vesicle; GO:0031982 vesicle; GO:0043226 organelle; GO:0043227 membrane-bounded organelle; GO:00…				Z	KOG0836	F-actin capping protein, alpha subunit
A6NF34	Anthrax toxin receptor-like OS=Homo sapiens OX=9606 GN=ANTXRL PE=3 SV=3	ANTXRL	0.3653	1.84351e-05	Down	70.628	17.1	7	7	0.564677	0.533994	0.506662	1.41824	1.54919	1.42723	plasma membrane							PF00092; PF05587	von Willebrand factor type A domain; Anthrax receptor extracellular domain
Q8WWC4	m-AAA protease-interacting protein 1, mitochondrial OS=Homo sapiens OX=9606 GN=MAIP1 PE=1 SV=1	MAIP1	0.3656	0.000189253	Down	32.544	10	3	3	0.562678	0.590796	0.617408	1.67508		1.55404	mitochondria				GO:0006810 transport; GO:0006811 ion transport; GO:0006812 cation transport; GO:0006816 calcium ion transport; GO:0006839 mitochondrial transport; GO:0006851 mitochondrial calcium ion transmembrane transport; GO:0006873 cellular ion homeostasis; GO:0006874 cellular calcium ion homeostasis; GO:0006875 cellular metal ion homeostasis; GO:0006996 organelle organization; GO:0007005 mitochondrion organ…	GO:0005622 intracellular; GO:0005623 cell; GO:0005737 cytoplasm; GO:0005739 mitochondrion; GO:0005740 mitochondrial envelope; GO:0005743 mitochondrial inner membrane; GO:0005759 mitochondrial matrix; GO:0016020 membrane; GO:0019866 organelle inner membrane; GO:0031090 organelle membrane; GO:0031966 mitochondrial membrane; GO:0031967 organelle envelope; GO:0031974 membrane-enclosed lumen; GO:00319…	GO:0005488 binding; GO:0043021 ribonucleoprotein complex binding; GO:0043022 ribosome binding; GO:0044877 protein-containing complex binding;
Q9H4G4	Golgi-associated plant pathogenesis-related protein 1 OS=Homo sapiens OX=9606 GN=GLIPR2 PE=1 SV=3	GLIPR2	0.3662	9.38559e-05	Down	17.218	39	4	4	0.495401	0.485727		1.28354	1.40619	1.32914	cytoplasm				GO:0001932 regulation of protein phosphorylation; GO:0001934 positive regulation of protein phosphorylation; GO:0009893 positive regulation of metabolic process; GO:0009966 regulation of signal transduction; GO:0009967 positive regulation of signal transduction; GO:0010562 positive regulation of phosphorus metabolic process; GO:0010604 positive regulation of macromolecule metabolic process; GO:00…	GO:0000139 Golgi membrane; GO:0005622 intracellular; GO:0005623 cell; GO:0005737 cytoplasm; GO:0005794 Golgi apparatus; GO:0012505 endomembrane system; GO:0016020 membrane; GO:0031090 organelle membrane; GO:0031984 organelle subcompartment; GO:0043226 organelle; GO:0043227 membrane-bounded organelle; GO:0043229 intracellular organelle; GO:0043231 intracellular membrane-bounded organelle; GO:00985…	GO:0005488 binding; GO:0005515 protein binding; GO:0042802 identical protein binding; GO:0042803 protein homodimerization activity; GO:0046983 protein dimerization activity;	PF00188	Cysteine-rich secretory protein family	S	KOG3017	Defense-related protein containing SCP domain
Q8TC56	Protein FAM71B OS=Homo sapiens OX=9606 GN=FAM71B PE=1 SV=2	FAM71B	0.3674	4.23174e-07	Down	64.755	36.4	18	17	0.520293	0.543854	0.547978	1.46602	1.46587	1.45598	nucleus					GO:0005622 intracellular; GO:0005623 cell; GO:0005634 nucleus; GO:0043226 organelle; GO:0043227 membrane-bounded organelle; GO:0043229 intracellular organelle; GO:0043231 intracellular membrane-bounded organelle;
P15289	Arylsulfatase A OS=Homo sapiens OX=9606 GN=ARSA PE=1 SV=3	ARSA	0.3676	7.93877e-08	Down	53.588	44.4	14	14	0.534194	0.539354	0.539313	1.49024	1.45816	1.43874	extracellular	K01134	ARSA; arylsulfatase A [EC:3.1.6.8]	hsa04142 Lysosome; hsa00600 Sphingolipid metabolism	GO:0000003 reproduction; GO:0001775 cell activation; GO:0002252 immune effector process; GO:0002263 cell activation involved in immune response; GO:0002274 myeloid leukocyte activation; GO:0002275 myeloid cell activation involved in immune response; GO:0002283 neutrophil activation involved in immune response; GO:0002366 leukocyte activation involved in immune response; GO:0002376 immune system p…	GO:0000323 lytic vacuole; GO:0001669 acrosomal vesicle; GO:0005576 extracellular region; GO:0005622 intracellular; GO:0005623 cell; GO:0005737 cytoplasm; GO:0005764 lysosome; GO:0005766 primary lysosome; GO:0005768 endosome; GO:0005773 vacuole; GO:0005775 vacuolar lumen; GO:0005783 endoplasmic reticulum; GO:0005788 endoplasmic reticulum lumen; GO:0005886 plasma membrane; GO:0009897 external side …	GO:0003824 catalytic activity; GO:0004065 arylsulfatase activity; GO:0004098 cerebroside-sulfatase activity; GO:0005488 binding; GO:0005509 calcium ion binding; GO:0008484 sulfuric ester hydrolase activity; GO:0016787 hydrolase activity; GO:0016788 hydrolase activity, acting on ester bonds; GO:0043167 ion binding; GO:0043169 cation binding; GO:0046872 metal ion binding;			P	KOG3867	Sulfatase
O75882	Attractin OS=Homo sapiens OX=9606 GN=ATRN PE=1 SV=2	ATRN	0.3678	2.53897e-06	Down	158.54	20.9	19	19	0.551221	0.549422	0.512874	1.43307	1.47655	1.47686	plasma membrane	K24332			GO:0006950 response to stress; GO:0006979 response to oxidative stress; GO:0007154 cell communication; GO:0007165 signal transduction; GO:0007272 ensheathment of neurons; GO:0007275 multicellular organism development; GO:0007399 nervous system development; GO:0007417 central nervous system development; GO:0007420 brain development; GO:0008366 axon ensheathment; GO:0009987 cellular process; GO:002…	GO:0005576 extracellular region; GO:0005615 extracellular space; GO:0005622 intracellular; GO:0005623 cell; GO:0005737 cytoplasm; GO:0005886 plasma membrane; GO:0005887 integral component of plasma membrane; GO:0016020 membrane; GO:0016021 integral component of membrane; GO:0031224 intrinsic component of membrane; GO:0031226 intrinsic component of plasma membrane; GO:0071944 cell periphery;	GO:0038023 signaling receptor activity; GO:0060089 molecular transducer activity;	PF00431; PF00059	CUB domain; Lectin C-type domain	T	KOG1388	Attractin and platelet-activating factor acetylhydrolase
Q53QW1	Testis-expressed protein 44 OS=Homo sapiens OX=9606 GN=TEX44 PE=1 SV=1	TEX44	0.368	0.00625851	Down	41.589	10.9	3	3	0.576758	0.500518	0.536884	1.58905	1.80026	0.996537	nucleus					GO:0005622 intracellular; GO:0005623 cell; GO:0005737 cytoplasm;
Q6SA08	Testis-specific serine/threonine-protein kinase 4 OS=Homo sapiens OX=9606 GN=TSSK4 PE=1 SV=1	TSSK4	0.3682	4.65109e-06	Down	37.454	32.6	9	9	0.556679	0.542745	0.515255	1.44412	1.42441	1.51679	cytoplasm	K08811			GO:0006355 regulation of transcription, DNA-templated; GO:0006464 cellular protein modification process; GO:0006468 protein phosphorylation; GO:0006793 phosphorus metabolic process; GO:0006796 phosphate-containing compound metabolic process; GO:0006807 nitrogen compound metabolic process; GO:0007154 cell communication; GO:0007165 signal transduction; GO:0008152 metabolic process; GO:0009889 regul…	GO:0001669 acrosomal vesicle; GO:0005622 intracellular; GO:0005623 cell; GO:0005634 nucleus; GO:0005737 cytoplasm; GO:0005929 cilium; GO:0012505 endomembrane system; GO:0030141 secretory granule; GO:0031410 cytoplasmic vesicle; GO:0031514 motile cilium; GO:0031982 vesicle; GO:0042995 cell projection; GO:0043226 organelle; GO:0043227 membrane-bounded organelle; GO:0043229 intracellular organelle; …	GO:0000166 nucleotide binding; GO:0000287 magnesium ion binding; GO:0003824 catalytic activity; GO:0004672 protein kinase activity; GO:0004674 protein serine/threonine kinase activity; GO:0005488 binding; GO:0005524 ATP binding; GO:0008144 drug binding; GO:0016301 kinase activity; GO:0016740 transferase activity; GO:0016772 transferase activity, transferring phosphorus-containing groups; GO:00167…	PF00069	Protein kinase domain	T	KOG0583	Serine/threonine protein kinase
P08575	Receptor-type tyrosine-protein phosphatase C OS=Homo sapiens OX=9606 GN=PTPRC PE=1 SV=3	PTPRC	0.3698	0.0183266	Down	147.48	14.6	15	15	0.543541	0.551191	0.525161	1.05197	2.22422	1.10392	peroxisome	K06478	PTPRC; receptor-type tyrosine-protein phosphatase C [EC:3.1.3.48]	hsa04666 Fc gamma R-mediated phagocytosis; hsa05132 Salmonella infection; hsa04514 Cell adhesion molecules; hsa05340 Primary immunodeficiency; hsa04660 T cell receptor signaling pathway	GO:0000018 regulation of DNA recombination; GO:0000187 activation of MAPK activity; GO:0001501 skeletal system development; GO:0001775 cell activation; GO:0001910 regulation of leukocyte mediated cytotoxicity; GO:0001911 negative regulation of leukocyte mediated cytotoxicity; GO:0001912 positive regulation of leukocyte mediated cytotoxicity; GO:0001914 regulation of T cell mediated cytotoxicity; …	GO:0005622 intracellular; GO:0005623 cell; GO:0005737 cytoplasm; GO:0005886 plasma membrane; GO:0005887 integral component of plasma membrane; GO:0005912 adherens junction; GO:0005925 focal adhesion; GO:0009897 external side of plasma membrane; GO:0009898 cytoplasmic side of plasma membrane; GO:0009986 cell surface; GO:0012505 endomembrane system; GO:0012506 vesicle membrane; GO:0016020 membrane;…	GO:0003824 catalytic activity; GO:0004721 phosphoprotein phosphatase activity; GO:0004725 protein tyrosine phosphatase activity; GO:0004888 transmembrane signaling receptor activity; GO:0005001 transmembrane receptor protein tyrosine phosphatase activity; GO:0005488 binding; GO:0005515 protein binding; GO:0005539 glycosaminoglycan binding; GO:0008201 heparin binding; GO:0016787 hydrolase activity…	PF00041; PF00102	Fibronectin type III domain; Protein-tyrosine phosphatase	T	KOG4228	Protein tyrosine phosphatase
Q9H0B3	IQ domain-containing protein N OS=Homo sapiens OX=9606 GN=IQCN PE=1 SV=1	IQCN	0.37	6.27589e-08	Down	127.69	63.1	55	55	0.532883	0.538795	0.548903	1.46388	1.44529	1.47025	nucleus					GO:0005622 intracellular; GO:0005623 cell; GO:0005737 cytoplasm; GO:0005739 mitochondrion; GO:0043226 organelle; GO:0043227 membrane-bounded organelle; GO:0043229 intracellular organelle; GO:0043231 intracellular membrane-bounded organelle;
P20933	N(4)-(beta-N-acetylglucosaminyl)-L-asparaginase OS=Homo sapiens OX=9606 GN=AGA PE=1 SV=2	AGA	0.3701	0.000102791	Down	37.208	16.2	5	5	0.479982	0.553752	0.587136	1.51345	1.47215	1.39352	extracellular	K01444	AGA; N4-(beta-N-acetylglucosaminyl)-L-asparaginase [EC:3.5.1.26]	hsa04142 Lysosome; hsa00511 Other glycan degradation	GO:0001775 cell activation; GO:0002252 immune effector process; GO:0002263 cell activation involved in immune response; GO:0002274 myeloid leukocyte activation; GO:0002275 myeloid cell activation involved in immune response; GO:0002283 neutrophil activation involved in immune response; GO:0002366 leukocyte activation involved in immune response; GO:0002376 immune system process; GO:0002443 leukoc…	GO:0000323 lytic vacuole; GO:0005576 extracellular region; GO:0005615 extracellular space; GO:0005622 intracellular; GO:0005623 cell; GO:0005737 cytoplasm; GO:0005764 lysosome; GO:0005766 primary lysosome; GO:0005773 vacuole; GO:0005775 vacuolar lumen; GO:0005783 endoplasmic reticulum; GO:0012505 endomembrane system; GO:0030141 secretory granule; GO:0031410 cytoplasmic vesicle; GO:0031974 membran…	GO:0003824 catalytic activity; GO:0003948 N4-(beta-N-acetylglucosaminyl)-L-asparaginase activity; GO:0005488 binding; GO:0005515 protein binding; GO:0016787 hydrolase activity; GO:0016810 hydrolase activity, acting on carbon-nitrogen (but not peptide) bonds; GO:0016811 hydrolase activity, acting on carbon-nitrogen (but not peptide) bonds, in linear amides; GO:0043621 protein self-association;	PF01112	Asparaginase	O	KOG1593	Asparaginase
Q6UWU2	Beta-galactosidase-1-like protein OS=Homo sapiens OX=9606 GN=GLB1L PE=2 SV=1	GLB1L	0.3708	2.43996e-07	Down	74.157	30.4	16	15	0.531327	0.553604	0.537976	1.47986	1.44986	1.44738	plasma membrane					GO:0005622 intracellular; GO:0005623 cell; GO:0005737 cytoplasm; GO:0005773 vacuole; GO:0043226 organelle; GO:0043227 membrane-bounded organelle; GO:0043229 intracellular organelle; GO:0043231 intracellular membrane-bounded organelle;	GO:0003824 catalytic activity; GO:0004553 hydrolase activity, hydrolyzing O-glycosyl compounds; GO:0004565 beta-galactosidase activity; GO:0015925 galactosidase activity; GO:0016787 hydrolase activity; GO:0016798 hydrolase activity, acting on glycosyl bonds;	PF01301	Glycosyl hydrolases family 35	G	KOG0496	Beta-galactosidase
Q8IYQ7	Threonine synthase-like 1 OS=Homo sapiens OX=9606 GN=THNSL1 PE=1 SV=2	THNSL1	0.3708	2.67219e-06	Down	83.069	23.3	13	13	0.558845	0.522124	0.541975	1.46724	1.414	1.49582	cytoplasm,mitochondria							PF01202	Shikimate kinase	E	KOG2616	Pyridoxalphosphate-dependent enzyme/predicted threonine synthase
Q5JX69	Protein FAM209B OS=Homo sapiens OX=9606 GN=FAM209B PE=2 SV=1	FAM209B	0.3709	7.32786e-06	Down	19.498	43.3	8	6	0.556551	0.552871	0.514009	1.40586	1.45858	1.51213	extracellular
Q32M84	BTB/POZ domain-containing protein 16 OS=Homo sapiens OX=9606 GN=BTBD16 PE=1 SV=2	BTBD16	0.3715	2.67521e-07	Down	58.48	38.5	17	17	0.541957	0.5474	0.535918	1.42796	1.49337	1.4534	nucleus	K10487				GO:0000151 ubiquitin ligase complex; GO:0005622 intracellular; GO:0005623 cell; GO:0005634 nucleus; GO:0032991 protein-containing complex; GO:0043226 organelle; GO:0043227 membrane-bounded organelle; GO:0043229 intracellular organelle; GO:0043231 intracellular membrane-bounded organelle; GO:1902494 catalytic complex; GO:1990234 transferase complex;				S	KOG4682	Uncharacterized conserved protein, contains BTB/POZ domain
P30038	Delta-1-pyrroline-5-carboxylate dehydrogenase, mitochondrial OS=Homo sapiens OX=9606 GN=ALDH4A1 PE=1 SV=3	ALDH4A1	0.3735	0.000183282	Down	61.719	35.2	15	15	0.48458	0.530476	0.616617	1.46356	1.51202	1.39274	mitochondria	K00294	E1.2.1.88; 1-pyrroline-5-carboxylate dehydrogenase [EC:1.2.1.88]	hsa00250 Alanine, aspartate and glutamate metabolism; hsa00330 Arginine and proline metabolism; hsa01100 Metabolic pathways	GO:0006081 cellular aldehyde metabolic process; GO:0006082 organic acid metabolic process; GO:0006091 generation of precursor metabolites and energy; GO:0006520 cellular amino acid metabolic process; GO:0006560 proline metabolic process; GO:0006562 proline catabolic process; GO:0006575 cellular modified amino acid metabolic process; GO:0006807 nitrogen compound metabolic process; GO:0008152 metab…	GO:0005622 intracellular; GO:0005623 cell; GO:0005737 cytoplasm; GO:0005739 mitochondrion; GO:0005759 mitochondrial matrix; GO:0031974 membrane-enclosed lumen; GO:0043226 organelle; GO:0043227 membrane-bounded organelle; GO:0043229 intracellular organelle; GO:0043231 intracellular membrane-bounded organelle; GO:0043233 organelle lumen; GO:0070013 intracellular organelle lumen;	GO:0003824 catalytic activity; GO:0003842 1-pyrroline-5-carboxylate dehydrogenase activity; GO:0004029 aldehyde dehydrogenase (NAD+) activity; GO:0005488 binding; GO:0005515 protein binding; GO:0009055 electron transfer activity; GO:0016491 oxidoreductase activity; GO:0016620 oxidoreductase activity, acting on the aldehyde or oxo group of donors, NAD or NADP as acceptor; GO:0016645 oxidoreductase…			C	KOG2455	Delta-1-pyrroline-5-carboxylate dehydrogenase
P26436	Acrosomal protein SP-10 OS=Homo sapiens OX=9606 GN=ACRV1 PE=1 SV=2	ACRV1	0.3736	1.10922e-06	Down	28.156	17.4	3	3	0.540781	0.54505	0.546167	1.42208	1.51516	1.43076	extracellular				GO:0007275 multicellular organism development; GO:0032501 multicellular organismal process; GO:0032502 developmental process; GO:0048856 anatomical structure development;	GO:0001669 acrosomal vesicle; GO:0005622 intracellular; GO:0005623 cell; GO:0005737 cytoplasm; GO:0012505 endomembrane system; GO:0030141 secretory granule; GO:0031410 cytoplasmic vesicle; GO:0031982 vesicle; GO:0043226 organelle; GO:0043227 membrane-bounded organelle; GO:0043229 intracellular organelle; GO:0097708 intracellular vesicle; GO:0099503 secretory vesicle;
Q8IZS6	Dynein light chain Tctex-type protein 2 OS=Homo sapiens OX=9606 GN=DYNLT2 PE=1 SV=1	DYNLT2	0.3745	4.81974e-06	Down	23.175	16.2	3	3	0.525181	0.543015	0.566547	1.45371	1.5053	1.40625	nucleus				GO:0006928 movement of cell or subcellular component; GO:0007017 microtubule-based process; GO:0007018 microtubule-based movement; GO:0009987 cellular process;	GO:0005622 intracellular; GO:0005623 cell; GO:0005856 cytoskeleton; GO:0005868 cytoplasmic dynein complex; GO:0005875 microtubule associated complex; GO:0005929 cilium; GO:0015630 microtubule cytoskeleton; GO:0016020 membrane; GO:0019898 extrinsic component of membrane; GO:0030286 dynein complex; GO:0031514 motile cilium; GO:0032991 protein-containing complex; GO:0036126 sperm flagellum; GO:00429…				N	KOG4108	Dynein light chain
Q6PI48	Aspartate--tRNA ligase, mitochondrial OS=Homo sapiens OX=9606 GN=DARS2 PE=1 SV=1	DARS2	0.3746	3.59261e-06	Down	73.562	35.8	18	18	0.536528	0.57055	0.527903	1.48146	1.41608	1.46747	mitochondria	K01876	DARS2; aspartyl-tRNA synthetase [EC:6.1.1.12]	hsa00970 Aminoacyl-tRNA biosynthesis	GO:0000959 mitochondrial RNA metabolic process; GO:0006082 organic acid metabolic process; GO:0006139 nucleobase-containing compound metabolic process; GO:0006399 tRNA metabolic process; GO:0006412 translation; GO:0006418 tRNA aminoacylation for protein translation; GO:0006421 asparaginyl-tRNA aminoacylation; GO:0006518 peptide metabolic process; GO:0006520 cellular amino acid metabolic process; …	GO:0005622 intracellular; GO:0005623 cell; GO:0005634 nucleus; GO:0005737 cytoplasm; GO:0005739 mitochondrion; GO:0005759 mitochondrial matrix; GO:0031974 membrane-enclosed lumen; GO:0043226 organelle; GO:0043227 membrane-bounded organelle; GO:0043229 intracellular organelle; GO:0043231 intracellular membrane-bounded organelle; GO:0043233 organelle lumen; GO:0070013 intracellular organelle lumen;	GO:0000049 tRNA binding; GO:0000166 nucleotide binding; GO:0003676 nucleic acid binding; GO:0003723 RNA binding; GO:0003824 catalytic activity; GO:0004812 aminoacyl-tRNA ligase activity; GO:0004815 aspartate-tRNA ligase activity; GO:0005488 binding; GO:0005515 protein binding; GO:0005524 ATP binding; GO:0008144 drug binding; GO:0016874 ligase activity; GO:0016875 ligase activity, forming carbon-o…	PF01336; PF00152; PF02938	OB-fold nucleic acid binding domain; tRNA synthetases class II (D, K and N) ; GAD domain	J	KOG2411	Aspartyl-tRNA synthetase, mitochondrial
Q8NEG0	Protein FAM71C OS=Homo sapiens OX=9606 GN=FAM71C PE=1 SV=1	FAM71C	0.3761	1.2843e-05	Down	27.472	39	9	7	0.553473	0.576114	0.510209	1.48008	1.45738	1.42275	cytoplasm					GO:0005622 intracellular; GO:0005623 cell; GO:0005634 nucleus; GO:0043226 organelle; GO:0043227 membrane-bounded organelle; GO:0043229 intracellular organelle; GO:0043231 intracellular membrane-bounded organelle;
Q8TC44	POC1 centriolar protein homolog B OS=Homo sapiens OX=9606 GN=POC1B PE=1 SV=1	POC1B	0.3779	2.4637e-05	Down	53.667	35.8	14	14	0.540545	0.564457	0.540432	1.5399	1.47592	1.33875	nucleus	K16482			GO:0001894 tissue homeostasis; GO:0001895 retina homeostasis; GO:0006996 organelle organization; GO:0008283 cell population proliferation; GO:0009987 cellular process; GO:0016043 cellular component organization; GO:0022607 cellular component assembly; GO:0030030 cell projection organization; GO:0030031 cell projection assembly; GO:0032501 multicellular organismal process; GO:0042592 homeostatic p…	GO:0000922 spindle pole; GO:0005622 intracellular; GO:0005623 cell; GO:0005737 cytoplasm; GO:0005813 centrosome; GO:0005814 centriole; GO:0005815 microtubule organizing center; GO:0005819 spindle; GO:0005856 cytoskeleton; GO:0005929 cilium; GO:0015630 microtubule cytoskeleton; GO:0036064 ciliary basal body; GO:0042995 cell projection; GO:0043226 organelle; GO:0043228 non-membrane-bounded organell…
Q8N7B9	EF-hand calcium-binding domain-containing protein 3 OS=Homo sapiens OX=9606 GN=EFCAB3 PE=1 SV=1	EFCAB3	0.38	5.66902e-06	Down	50.146	25.3	10	10	0.544888	0.533466	0.573957	1.38915	1.47607	1.48247	nucleus							PF13833	EF-hand domain pair	T	KOG0027	Calmodulin and related proteins (EF-Hand superfamily)
Q5T871	Late cornified envelope-like proline-rich protein 1 OS=Homo sapiens OX=9606 GN=LELP1 PE=1 SV=1	LELP1	0.3807	1.00554e-05	Down	10.697	49	4	4	0.569238	0.531239	0.553862	1.36943	1.50479	1.47145	extracellular
Q6X784	Zona pellucida-binding protein 2 OS=Homo sapiens OX=9606 GN=ZPBP2 PE=2 SV=1	ZPBP2	0.3809	6.28163e-07	Down	38.652	38.8	11	11	0.551614	0.552992	0.55035	1.49341	1.40663	1.445	extracellular				GO:0000003 reproduction; GO:0001675 acrosome assembly; GO:0003006 developmental process involved in reproduction; GO:0006996 organelle organization; GO:0007276 gamete generation; GO:0007281 germ cell development; GO:0007283 spermatogenesis; GO:0007286 spermatid development; GO:0007338 single fertilization; GO:0007339 binding of sperm to zona pellucida; GO:0008037 cell recognition; GO:0009566 fert…	GO:0001669 acrosomal vesicle; GO:0002199 zona pellucida receptor complex; GO:0005622 intracellular; GO:0005623 cell; GO:0005737 cytoplasm; GO:0012505 endomembrane system; GO:0030141 secretory granule; GO:0031410 cytoplasmic vesicle; GO:0031982 vesicle; GO:0032991 protein-containing complex; GO:0043226 organelle; GO:0043227 membrane-bounded organelle; GO:0043229 intracellular organelle; GO:0044297…
Q9NVA2	Septin-11 OS=Homo sapiens OX=9606 GN=SEPTIN11 PE=1 SV=3	SEPTIN11	0.381	0.00529031	Down	49.398	25.9	9	5	0.596028		0.416708	1.33505	1.35187	1.30034	nucleus	K16939	SEPT6_8_11; septin 6/8/11	hsa05100 Bacterial invasion of epithelial cells; hsa05131 Shigellosis	GO:0009987 cellular process; GO:0016043 cellular component organization; GO:0022607 cellular component assembly; GO:0043933 protein-containing complex subunit organization; GO:0044085 cellular component biogenesis; GO:0051259 protein complex oligomerization; GO:0051291 protein heterooligomerization; GO:0065003 protein-containing complex assembly; GO:0071840 cellular component organization or biog…	GO:0001725 stress fiber; GO:0005622 intracellular; GO:0005623 cell; GO:0005856 cytoskeleton; GO:0015629 actin cytoskeleton; GO:0030424 axon; GO:0030425 dendrite; GO:0032432 actin filament bundle; GO:0036477 somatodendritic compartment; GO:0042641 actomyosin; GO:0042995 cell projection; GO:0043005 neuron projection; GO:0043197 dendritic spine; GO:0043226 organelle; GO:0043228 non-membrane-bounded …		PF00735	Septin	Z	KOG3859	Septins (P-loop GTPases)
P12694	2-oxoisovalerate dehydrogenase subunit alpha, mitochondrial OS=Homo sapiens OX=9606 GN=BCKDHA PE=1 SV=2	BCKDHA	0.3812	8.11061e-06	Down	50.47	29.4	10	10	0.557918	0.528543	0.56943	1.37855	1.48006	1.4855	mitochondria	K00166	BCKDHA; 2-oxoisovalerate dehydrogenase E1 component alpha subunit [EC:1.2.4.4]	hsa00640 Propanoate metabolism; hsa00280 Valine, leucine and isoleucine degradation; hsa01100 Metabolic pathways	GO:0006082 organic acid metabolic process; GO:0006520 cellular amino acid metabolic process; GO:0006807 nitrogen compound metabolic process; GO:0007584 response to nutrient; GO:0008152 metabolic process; GO:0009056 catabolic process; GO:0009063 cellular amino acid catabolic process; GO:0009081 branched-chain amino acid metabolic process; GO:0009083 branched-chain amino acid catabolic process; GO:…	GO:0005622 intracellular; GO:0005623 cell; GO:0005737 cytoplasm; GO:0005739 mitochondrion; GO:0005759 mitochondrial matrix; GO:0005947 mitochondrial alpha-ketoglutarate dehydrogenase complex; GO:0030062 mitochondrial tricarboxylic acid cycle enzyme complex; GO:0031974 membrane-enclosed lumen; GO:0032991 protein-containing complex; GO:0043226 organelle; GO:0043227 membrane-bounded organelle; GO:00…	GO:0003824 catalytic activity; GO:0003826 alpha-ketoacid dehydrogenase activity; GO:0003863 3-methyl-2-oxobutanoate dehydrogenase (2-methylpropanoyl-transferring) activity; GO:0005488 binding; GO:0016491 oxidoreductase activity; GO:0016620 oxidoreductase activity, acting on the aldehyde or oxo group of donors, NAD or NADP as acceptor; GO:0016624 oxidoreductase activity, acting on the aldehyde or …			C	KOG1182	Branched chain alpha-keto acid dehydrogenase complex, alpha subunit
Q8NEB7	Acrosin-binding protein OS=Homo sapiens OX=9606 GN=ACRBP PE=2 SV=1	ACRBP	0.3812	4.12447e-08	Down	61.358	55.8	21	21	0.557201	0.549411	0.549207	1.46312	1.45361	1.42745	extracellular				GO:0000003 reproduction; GO:0003006 developmental process involved in reproduction; GO:0007276 gamete generation; GO:0007281 germ cell development; GO:0007283 spermatogenesis; GO:0007286 spermatid development; GO:0009893 positive regulation of metabolic process; GO:0009987 cellular process; GO:0010604 positive regulation of macromolecule metabolic process; GO:0010952 positive regulation of peptid…	GO:0001669 acrosomal vesicle; GO:0002080 acrosomal membrane; GO:0005576 extracellular region; GO:0005622 intracellular; GO:0005623 cell; GO:0005634 nucleus; GO:0005737 cytoplasm; GO:0012505 endomembrane system; GO:0012506 vesicle membrane; GO:0016020 membrane; GO:0030141 secretory granule; GO:0030659 cytoplasmic vesicle membrane; GO:0030667 secretory granule membrane; GO:0031090 organelle membran…	GO:0008047 enzyme activator activity; GO:0016504 peptidase activator activity; GO:0030234 enzyme regulator activity; GO:0061134 peptidase regulator activity; GO:0098772 molecular function regulator;
A6NC86	phospholipase A2 inhibitor and Ly6/PLAUR domain-containing protein OS=Homo sapiens OX=9606 GN=PINLYP PE=2 SV=3	PINLYP	0.3822	7.83529e-06	Down	21.925	50	8	8	0.565629	0.552355	0.54112	1.43625	1.37756	1.52709	extracellular							PF02988; PF00021	Phospholipase A2 inhibitor; u-PAR/Ly-6 domain
Q8TC94	Actin-like protein 9 OS=Homo sapiens OX=9606 GN=ACTL9 PE=1 SV=3	ACTL9	0.3835	8.52376e-07	Down	45.627	41.8	12	12	0.571949	0.538134	0.553089	1.42824	1.45463	1.45396	cytoplasm									Z	KOG0676	Actin and related proteins
Q96BY9	Store-operated calcium entry-associated regulatory factor OS=Homo sapiens OX=9606 GN=SARAF PE=1 SV=1	SARAF	0.3835	6.58715e-05	Down	36.975	20.9	5	5	0.584467	0.566188	0.512593	1.35382	1.43435	1.54858	plasma membrane				GO:0010959 regulation of metal ion transport; GO:0032879 regulation of localization; GO:0043269 regulation of ion transport; GO:0050789 regulation of biological process; GO:0051049 regulation of transport; GO:0051924 regulation of calcium ion transport; GO:0065007 biological regulation; GO:2001256 regulation of store-operated calcium entry;	GO:0005622 intracellular; GO:0005623 cell; GO:0005737 cytoplasm; GO:0005783 endoplasmic reticulum; GO:0005789 endoplasmic reticulum membrane; GO:0012505 endomembrane system; GO:0016020 membrane; GO:0016021 integral component of membrane; GO:0030176 integral component of endoplasmic reticulum membrane; GO:0031224 intrinsic component of membrane; GO:0031227 intrinsic component of endoplasmic reticu…
A6NK58	Putative lipoyltransferase 2, mitochondrial OS=Homo sapiens OX=9606 GN=LIPT2 PE=1 SV=1	LIPT2	0.385	7.18835e-05	Down	25.195	31.2	5	5	0.497522	0.574774	0.595591	1.43956	1.4126	1.47995	mitochondria	K23735	LIPT2; lipoyl(octanoyl) transferase 2 [EC:2.3.1.181]	hsa01240 Biosynthesis of cofactors; hsa00785 Lipoic acid metabolism; hsa01100 Metabolic pathways	GO:0006464 cellular protein modification process; GO:0006807 nitrogen compound metabolic process; GO:0008152 metabolic process; GO:0009249 protein lipoylation; GO:0009893 positive regulation of metabolic process; GO:0009987 cellular process; GO:0010467 gene expression; GO:0018065 protein-cofactor linkage; GO:0018193 peptidyl-amino acid modification; GO:0018205 peptidyl-lysine modification; GO:001…	GO:0005622 intracellular; GO:0005623 cell; GO:0005737 cytoplasm; GO:0005739 mitochondrion; GO:0005759 mitochondrial matrix; GO:0031974 membrane-enclosed lumen; GO:0043226 organelle; GO:0043227 membrane-bounded organelle; GO:0043229 intracellular organelle; GO:0043231 intracellular membrane-bounded organelle; GO:0043233 organelle lumen; GO:0070013 intracellular organelle lumen;	GO:0003824 catalytic activity; GO:0016740 transferase activity; GO:0016746 transferase activity, transferring acyl groups; GO:0016747 transferase activity, transferring acyl groups other than amino-acyl groups; GO:0033819 lipoyl(octanoyl) transferase activity;	PF03099	Biotin/lipoate A/B protein ligase family	CH	KOG0325	Lipoyltransferase
Q96FJ2	Dynein light chain 2, cytoplasmic OS=Homo sapiens OX=9606 GN=DYNLL2 PE=1 SV=1	DYNLL2	0.385	3.9037e-06	Down	10.35	49.4	3	1	0.536053	0.575848	0.555851	1.48131	1.45508	1.39585	cytoplasm	K10418	DYNLL; dynein light chain LC8-type	hsa05132 Salmonella infection; hsa04962 Vasopressin-regulated water reabsorption	GO:0002376 immune system process; GO:0002478 antigen processing and presentation of exogenous peptide antigen; GO:0002495 antigen processing and presentation of peptide antigen via MHC class II; GO:0002504 antigen processing and presentation of peptide or polysaccharide antigen via MHC class II; GO:0006810 transport; GO:0006888 endoplasmic reticulum to Golgi vesicle-mediated transport; GO:0006914…	GO:0005622 intracellular; GO:0005623 cell; GO:0005737 cytoplasm; GO:0005813 centrosome; GO:0005815 microtubule organizing center; GO:0005829 cytosol; GO:0005856 cytoskeleton; GO:0005868 cytoplasmic dynein complex; GO:0005875 microtubule associated complex; GO:0005886 plasma membrane; GO:0005929 cilium; GO:0015629 actin cytoskeleton; GO:0015630 microtubule cytoskeleton; GO:0016020 membrane; GO:001…	GO:0005488 binding; GO:0005515 protein binding; GO:0008092 cytoskeletal protein binding; GO:0042802 identical protein binding; GO:0042803 protein homodimerization activity; GO:0045505 dynein intermediate chain binding; GO:0046982 protein heterodimerization activity; GO:0046983 protein dimerization activity; GO:0051959 dynein light intermediate chain binding; GO:0097110 scaffold protein binding;	PF01221	Dynein light chain type 1	Z	KOG3430	Dynein light chain type 1
A6NFZ4	Protein FAM24A OS=Homo sapiens OX=9606 GN=FAM24A PE=3 SV=1	FAM24A	0.3858	6.71538e-05	Down	11.258	43.8	3	3	0.589212	0.521516	0.559683	1.32344	1.51299	1.49316	extracellular					GO:0005576 extracellular region;
Q96PF2	Testis-specific serine/threonine-protein kinase 2 OS=Homo sapiens OX=9606 GN=TSSK2 PE=1 SV=2	TSSK2	0.3869	1.25168e-07	Down	40.939	38.3	12	12	0.563948	0.561748	0.548059	1.44654	1.4571	1.42261	cytoplasm	K08811			GO:0000003 reproduction; GO:0003006 developmental process involved in reproduction; GO:0006464 cellular protein modification process; GO:0006468 protein phosphorylation; GO:0006793 phosphorus metabolic process; GO:0006796 phosphate-containing compound metabolic process; GO:0006807 nitrogen compound metabolic process; GO:0007154 cell communication; GO:0007165 signal transduction; GO:0007276 gamete…	GO:0001669 acrosomal vesicle; GO:0005622 intracellular; GO:0005623 cell; GO:0005634 nucleus; GO:0005737 cytoplasm; GO:0005814 centriole; GO:0005815 microtubule organizing center; GO:0005856 cytoskeleton; GO:0012505 endomembrane system; GO:0015630 microtubule cytoskeleton; GO:0030141 secretory granule; GO:0031410 cytoplasmic vesicle; GO:0031982 vesicle; GO:0043226 organelle; GO:0043227 membrane-bo…	GO:0000166 nucleotide binding; GO:0000287 magnesium ion binding; GO:0003824 catalytic activity; GO:0004672 protein kinase activity; GO:0004674 protein serine/threonine kinase activity; GO:0005488 binding; GO:0005524 ATP binding; GO:0008144 drug binding; GO:0016301 kinase activity; GO:0016740 transferase activity; GO:0016772 transferase activity, transferring phosphorus-containing groups; GO:00167…	PF00069	Protein kinase domain	T	KOG0583	Serine/threonine protein kinase
Q86YW0	1-phosphatidylinositol 4,5-bisphosphate phosphodiesterase zeta-1 OS=Homo sapiens OX=9606 GN=PLCZ1 PE=1 SV=1	PLCZ1	0.3889	6.01277e-06	Down	70.41	20.2	10	10	0.552173	0.567432	0.560477	1.45452	1.50294	1.36245	cytoplasm	K05861	PLCZ; phosphatidylinositol phospholipase C, zeta [EC:3.1.4.11]	hsa04070 Phosphatidylinositol signaling system; hsa04020 Calcium signaling pathway; hsa00562 Inositol phosphate metabolism; hsa04919 Thyroid hormone signaling pathway; hsa04114 Oocyte meiosis; hsa05131 Shigellosis; hsa01100 Metabolic pathways	GO:0000003 reproduction; GO:0001775 cell activation; GO:0006066 alcohol metabolic process; GO:0006793 phosphorus metabolic process; GO:0006796 phosphate-containing compound metabolic process; GO:0006810 transport; GO:0006811 ion transport; GO:0006812 cation transport; GO:0006816 calcium ion transport; GO:0006873 cellular ion homeostasis; GO:0006874 cellular calcium ion homeostasis; GO:0006875 cel…	GO:0005622 intracellular; GO:0005623 cell; GO:0005634 nucleus; GO:0005654 nucleoplasm; GO:0005730 nucleolus; GO:0005737 cytoplasm; GO:0005829 cytosol; GO:0031974 membrane-enclosed lumen; GO:0031981 nuclear lumen; GO:0043226 organelle; GO:0043227 membrane-bounded organelle; GO:0043228 non-membrane-bounded organelle; GO:0043229 intracellular organelle; GO:0043231 intracellular membrane-bounded orga…	GO:0003824 catalytic activity; GO:0004435 phosphatidylinositol phospholipase C activity; GO:0004620 phospholipase activity; GO:0004629 phospholipase C activity; GO:0005488 binding; GO:0005543 phospholipid binding; GO:0005546 phosphatidylinositol-4,5-bisphosphate binding; GO:0008081 phosphoric diester hydrolase activity; GO:0008289 lipid binding; GO:0010314 phosphatidylinositol-5-phosphate binding…	PF09279; PF00168	Phosphoinositide-specific phospholipase C, efhand-like; C2 domain	I	KOG0169	Phosphoinositide-specific phospholipase C
Q9NYL9	Tropomodulin-3 OS=Homo sapiens OX=9606 GN=TMOD3 PE=1 SV=1	TMOD3	0.3894	0.00659276	Down	39.594	13.1	3	3	0.48858	0.669854	0.685263		1.58963	1.56667	cytoplasm	K10370			GO:0002262 myeloid cell homeostasis; GO:0002376 immune system process; GO:0002520 immune system development; GO:0003008 system process; GO:0003012 muscle system process; GO:0006936 muscle contraction; GO:0006996 organelle organization; GO:0007010 cytoskeleton organization; GO:0007015 actin filament organization; GO:0007275 multicellular organism development; GO:0007346 regulation of mitotic cell …	GO:0001726 ruffle; GO:0005622 intracellular; GO:0005623 cell; GO:0005737 cytoplasm; GO:0005856 cytoskeleton; GO:0005865 striated muscle thin filament; GO:0005884 actin filament; GO:0015629 actin cytoskeleton; GO:0030016 myofibril; GO:0030017 sarcomere; GO:0030027 lamellipodium; GO:0031252 cell leading edge; GO:0031941 filamentous actin; GO:0032991 protein-containing complex; GO:0036379 myofilamen…	GO:0005488 binding; GO:0005515 protein binding; GO:0005523 tropomyosin binding; GO:0008017 microtubule binding; GO:0008092 cytoskeletal protein binding; GO:0015631 tubulin binding; GO:0051011 microtubule minus-end binding;			Z	KOG3735	Tropomodulin and leiomodulin
Q8TDM5	Sperm acrosome membrane-associated protein 4 OS=Homo sapiens OX=9606 GN=SPACA4 PE=1 SV=1	SPACA4	0.3899	4.18572e-06	Down	13.004	21.8	2	2	0.586839	0.553018	0.543439	1.45086	1.3992	1.46664	extracellular	K19894			GO:0006950 response to stress; GO:0006952 defense response; GO:0008152 metabolic process; GO:0009056 catabolic process; GO:0009605 response to external stimulus; GO:0009607 response to biotic stimulus; GO:0009617 response to bacterium; GO:0009987 cellular process; GO:0016998 cell wall macromolecule catabolic process; GO:0042742 defense response to bacterium; GO:0043170 macromolecule metabolic pro…	GO:0001669 acrosomal vesicle; GO:0005576 extracellular region; GO:0005615 extracellular space; GO:0005622 intracellular; GO:0005623 cell; GO:0005737 cytoplasm; GO:0005886 plasma membrane; GO:0012505 endomembrane system; GO:0016020 membrane; GO:0030141 secretory granule; GO:0031410 cytoplasmic vesicle; GO:0031982 vesicle; GO:0043226 organelle; GO:0043227 membrane-bounded organelle; GO:0043229 intr…	GO:0003796 lysozyme activity; GO:0003824 catalytic activity; GO:0004553 hydrolase activity, hydrolyzing O-glycosyl compounds; GO:0016787 hydrolase activity; GO:0016798 hydrolase activity, acting on glycosyl bonds; GO:0061783 peptidoglycan muralytic activity;	PF00021	u-PAR/Ly-6 domain
Q969Q5	Ras-related protein Rab-24 OS=Homo sapiens OX=9606 GN=RAB24 PE=1 SV=1	RAB24	0.3908	0.000457139	Down	23.124	21.7	3	3	0.51763	0.646675	0.521612	1.35914	1.58995	1.365	cytoplasm	K07912			GO:0001775 cell activation; GO:0002252 immune effector process; GO:0002263 cell activation involved in immune response; GO:0002274 myeloid leukocyte activation; GO:0002275 myeloid cell activation involved in immune response; GO:0002283 neutrophil activation involved in immune response; GO:0002366 leukocyte activation involved in immune response; GO:0002376 immune system process; GO:0002443 leukoc…	GO:0005622 intracellular; GO:0005623 cell; GO:0005737 cytoplasm; GO:0005773 vacuole; GO:0005776 autophagosome; GO:0005886 plasma membrane; GO:0012505 endomembrane system; GO:0012506 vesicle membrane; GO:0016020 membrane; GO:0030141 secretory granule; GO:0030659 cytoplasmic vesicle membrane; GO:0030667 secretory granule membrane; GO:0031090 organelle membrane; GO:0031410 cytoplasmic vesicle; GO:00…		PF00071	Ras family	U	KOG0092	GTPase Rab5/YPT51 and related small G protein superfamily GTPases
Q99439	Calponin-2 OS=Homo sapiens OX=9606 GN=CNN2 PE=1 SV=4	CNN2	0.3918	0.0153886	Down	33.697	10.7	2	2	0.614529	0.421005		1.07716	1.43779	1.44951	cytoplasm				GO:0001775 cell activation; GO:0002252 immune effector process; GO:0002263 cell activation involved in immune response; GO:0002274 myeloid leukocyte activation; GO:0002275 myeloid cell activation involved in immune response; GO:0002283 neutrophil activation involved in immune response; GO:0002366 leukocyte activation involved in immune response; GO:0002376 immune system process; GO:0002443 leukoc…	GO:0001725 stress fiber; GO:0005576 extracellular region; GO:0005622 intracellular; GO:0005623 cell; GO:0005737 cytoplasm; GO:0005856 cytoskeleton; GO:0005911 cell-cell junction; GO:0012505 endomembrane system; GO:0015629 actin cytoskeleton; GO:0030054 cell junction; GO:0030141 secretory granule; GO:0031410 cytoplasmic vesicle; GO:0031974 membrane-enclosed lumen; GO:0031982 vesicle; GO:0031983 ve…	GO:0003779 actin binding; GO:0005488 binding; GO:0005515 protein binding; GO:0008092 cytoskeletal protein binding;	PF00307	Calponin homology (CH) domain	Z	KOG2046	Calponin
P23368	NAD-dependent malic enzyme, mitochondrial OS=Homo sapiens OX=9606 GN=ME2 PE=1 SV=1	ME2	0.3936	4.24498e-07	Down	65.443	46.7	23	22	0.552621	0.562906	0.579007	1.45499	1.42631	1.42416	mitochondria	K00027	ME2; malate dehydrogenase (oxaloacetate-decarboxylating) [EC:1.1.1.38]	hsa00620 Pyruvate metabolism; hsa01200 Carbon metabolism	GO:0006082 organic acid metabolic process; GO:0006090 pyruvate metabolic process; GO:0006091 generation of precursor metabolites and energy; GO:0006099 tricarboxylic acid cycle; GO:0006101 citrate metabolic process; GO:0006108 malate metabolic process; GO:0006140 regulation of nucleotide metabolic process; GO:0008152 metabolic process; GO:0009060 aerobic respiration; GO:0009987 cellular process; …	GO:0005622 intracellular; GO:0005623 cell; GO:0005737 cytoplasm; GO:0005739 mitochondrion; GO:0005759 mitochondrial matrix; GO:0031974 membrane-enclosed lumen; GO:0043226 organelle; GO:0043227 membrane-bounded organelle; GO:0043229 intracellular organelle; GO:0043231 intracellular membrane-bounded organelle; GO:0043233 organelle lumen; GO:0070013 intracellular organelle lumen;	GO:0003824 catalytic activity; GO:0004470 malic enzyme activity; GO:0004471 malate dehydrogenase (decarboxylating) (NAD+) activity; GO:0004473 malate dehydrogenase (decarboxylating) (NADP+) activity; GO:0009055 electron transfer activity; GO:0016491 oxidoreductase activity; GO:0016614 oxidoreductase activity, acting on CH-OH group of donors; GO:0016615 malate dehydrogenase activity; GO:0016616 ox…	PF00390; PF03949	Malic enzyme, N-terminal domain; Malic enzyme, NAD binding domain	C	KOG1257	NADP+-dependent malic enzyme
Q10713	Mitochondrial-processing peptidase subunit alpha OS=Homo sapiens OX=9606 GN=PMPCA PE=1 SV=2	PMPCA	0.3954	1.41099e-05	Down	58.252	29	12	12	0.564346	0.600514	0.535355	1.43866	1.46761	1.39352	mitochondria	K01412			GO:0006508 proteolysis; GO:0006605 protein targeting; GO:0006626 protein targeting to mitochondrion; GO:0006627 protein processing involved in protein targeting to mitochondrion; GO:0006807 nitrogen compound metabolic process; GO:0006810 transport; GO:0006811 ion transport; GO:0006812 cation transport; GO:0006816 calcium ion transport; GO:0006839 mitochondrial transport; GO:0006851 mitochondrial …	GO:0005622 intracellular; GO:0005623 cell; GO:0005737 cytoplasm; GO:0005739 mitochondrion; GO:0005740 mitochondrial envelope; GO:0005743 mitochondrial inner membrane; GO:0005759 mitochondrial matrix; GO:0016020 membrane; GO:0019866 organelle inner membrane; GO:0031090 organelle membrane; GO:0031966 mitochondrial membrane; GO:0031967 organelle envelope; GO:0031974 membrane-enclosed lumen; GO:00319…	GO:0003824 catalytic activity; GO:0004175 endopeptidase activity; GO:0004222 metalloendopeptidase activity; GO:0005488 binding; GO:0008233 peptidase activity; GO:0008237 metallopeptidase activity; GO:0008270 zinc ion binding; GO:0016787 hydrolase activity; GO:0043167 ion binding; GO:0043169 cation binding; GO:0046872 metal ion binding; GO:0046914 transition metal ion binding; GO:0070011 peptidase…	PF05193	Peptidase M16 inactive domain	C	KOG2067	Mitochondrial processing peptidase, alpha subunit
A8MYU2	Potassium channel subfamily U member 1 OS=Homo sapiens OX=9606 GN=KCNU1 PE=1 SV=2	KCNU1	0.3961	1.88767e-06	Down	129.54	14.2	12	12	0.56452	0.56655	0.571201	1.37165	1.45622	1.46986	plasma membrane	K05274	KCNMA3; potassium large conductance calcium-activated channel subfamily M alpha member 3	hsa04270 Vascular smooth muscle contraction; hsa04911 Insulin secretion; hsa04022 cGMP-PKG signaling pathway	GO:0000003 reproduction; GO:0006810 transport; GO:0006811 ion transport; GO:0006812 cation transport; GO:0006813 potassium ion transport; GO:0007338 single fertilization; GO:0008037 cell recognition; GO:0009566 fertilization; GO:0009987 cellular process; GO:0009988 cell-cell recognition; GO:0015672 monovalent inorganic cation transport; GO:0019953 sexual reproduction; GO:0022414 reproductive proc…	GO:0005623 cell; GO:0005886 plasma membrane; GO:0005887 integral component of plasma membrane; GO:0008076 voltage-gated potassium channel complex; GO:0016020 membrane; GO:0016021 integral component of membrane; GO:0031224 intrinsic component of membrane; GO:0031226 intrinsic component of plasma membrane; GO:0032991 protein-containing complex; GO:0034702 ion channel complex; GO:0034703 cation chan…	GO:0005215 transporter activity; GO:0005216 ion channel activity; GO:0005227 calcium activated cation channel activity; GO:0005244 voltage-gated ion channel activity; GO:0005249 voltage-gated potassium channel activity; GO:0005261 cation channel activity; GO:0005267 potassium channel activity; GO:0008324 cation transmembrane transporter activity; GO:0015075 ion transmembrane transporter activity;…			P	KOG1420	Ca2+-activated K+ channel Slowpoke, alpha subunit
P01011	Alpha-1-antichymotrypsin OS=Homo sapiens OX=9606 GN=SERPINA3 PE=1 SV=2	SERPINA3	0.3964	9.14319e-07	Down	47.65	29.6	10	10	0.56342	0.553263	0.586621	1.43493	1.44547	1.4163	extracellular	K04525			GO:0001775 cell activation; GO:0001894 tissue homeostasis; GO:0002237 response to molecule of bacterial origin; GO:0002252 immune effector process; GO:0002263 cell activation involved in immune response; GO:0002274 myeloid leukocyte activation; GO:0002275 myeloid cell activation involved in immune response; GO:0002283 neutrophil activation involved in immune response; GO:0002366 leukocyte activat…	GO:0000323 lytic vacuole; GO:0005576 extracellular region; GO:0005615 extracellular space; GO:0005622 intracellular; GO:0005623 cell; GO:0005634 nucleus; GO:0005737 cytoplasm; GO:0005764 lysosome; GO:0005766 primary lysosome; GO:0005773 vacuole; GO:0005775 vacuolar lumen; GO:0012505 endomembrane system; GO:0030141 secretory granule; GO:0031091 platelet alpha granule; GO:0031093 platelet alpha gra…	GO:0003676 nucleic acid binding; GO:0003677 DNA binding; GO:0004857 enzyme inhibitor activity; GO:0004866 endopeptidase inhibitor activity; GO:0004867 serine-type endopeptidase inhibitor activity; GO:0004869 cysteine-type endopeptidase inhibitor activity; GO:0005488 binding; GO:0030234 enzyme regulator activity; GO:0030414 peptidase inhibitor activity; GO:0061134 peptidase regulator activity; GO:…	PF00079	Serpin (serine protease inhibitor)	V	KOG2392	Serpin
Q8IYT1	Protein FAM71A OS=Homo sapiens OX=9606 GN=FAM71A PE=1 SV=2	FAM71A	0.3967	6.61603e-06	Down	63.177	29.6	15	13	0.588858	0.544479	0.570957	1.44034	1.38002	1.47535	nucleus
Q8NE62	Choline dehydrogenase, mitochondrial OS=Homo sapiens OX=9606 GN=CHDH PE=1 SV=2	CHDH	0.3972	3.74378e-06	Down	65.358	27.4	13	13	0.542501	0.579377	0.58379	1.40138	1.45828	1.43467	mitochondria	K00108	betA; choline dehydrogenase [EC:1.1.99.1]	hsa00260 Glycine, serine and threonine metabolism; hsa01100 Metabolic pathways	GO:0001505 regulation of neurotransmitter levels; GO:0006576 cellular biogenic amine metabolic process; GO:0006807 nitrogen compound metabolic process; GO:0008152 metabolic process; GO:0009056 catabolic process; GO:0009308 amine metabolic process; GO:0009310 amine catabolic process; GO:0009987 cellular process; GO:0019695 choline metabolic process; GO:0034641 cellular nitrogen compound metabolic …	GO:0005622 intracellular; GO:0005623 cell; GO:0005737 cytoplasm; GO:0005739 mitochondrion; GO:0005740 mitochondrial envelope; GO:0005743 mitochondrial inner membrane; GO:0016020 membrane; GO:0019866 organelle inner membrane; GO:0031090 organelle membrane; GO:0031966 mitochondrial membrane; GO:0031967 organelle envelope; GO:0031975 envelope; GO:0043226 organelle; GO:0043227 membrane-bounded organe…	GO:0003824 catalytic activity; GO:0008812 choline dehydrogenase activity; GO:0016491 oxidoreductase activity; GO:0016614 oxidoreductase activity, acting on CH-OH group of donors;	PF00732; PF05199	GMC oxidoreductase; GMC oxidoreductase	C	KOG1238	Glucose dehydrogenase/choline dehydrogenase/mandelonitrile lyase (GMC oxidoreductase family)
A1L453	Serine protease 38 OS=Homo sapiens OX=9606 GN=PRSS38 PE=2 SV=2	PRSS38	0.398	6.45249e-06	Down	35.356	16	3	3	0.578126	0.585196	0.544775	1.45029	1.37509	1.46653	extracellular							PF00089	Trypsin	O	KOG3627	Trypsin
Q8TDQ7	Glucosamine-6-phosphate isomerase 2 OS=Homo sapiens OX=9606 GN=GNPDA2 PE=1 SV=1	GNPDA2	0.3982	0.000118022	Down	31.084	62.7	11	6	0.611298	0.502767	0.594837	1.43479	1.40245	1.45385	cytoplasm	K02564	nagB; glucosamine-6-phosphate deaminase [EC:3.5.99.6]	hsa00520 Amino sugar and nucleotide sugar metabolism; hsa01100 Metabolic pathways	GO:0006040 amino sugar metabolic process; GO:0006041 glucosamine metabolic process; GO:0006043 glucosamine catabolic process; GO:0008152 metabolic process; GO:0009056 catabolic process; GO:0046348 amino sugar catabolic process; GO:0071704 organic substance metabolic process; GO:1901071 glucosamine-containing compound metabolic process; GO:1901072 glucosamine-containing compound catabolic process;…	GO:0005622 intracellular; GO:0005623 cell; GO:0005737 cytoplasm; GO:0005829 cytosol;	GO:0003824 catalytic activity; GO:0004342 glucosamine-6-phosphate deaminase activity; GO:0016787 hydrolase activity; GO:0016853 isomerase activity; GO:0016860 intramolecular oxidoreductase activity; GO:0016861 intramolecular oxidoreductase activity, interconverting aldoses and ketoses; GO:0019239 deaminase activity;	PF01182	Glucosamine-6-phosphate isomerases/6-phosphogluconolactonase	G	KOG3148	Glucosamine-6-phosphate isomerase
P19404	NADH dehydrogenase [ubiquinone] flavoprotein 2, mitochondrial OS=Homo sapiens OX=9606 GN=NDUFV2 PE=1 SV=2	NDUFV2	0.3984	4.3016e-07	Down	27.391	38.2	7	7	0.568374	0.572991	0.567967	1.45746	1.44434	1.38886	mitochondria	K03943	NDUFV2; NADH dehydrogenase (ubiquinone) flavoprotein 2 [EC:7.1.1.2]	hsa04932 Non-alcoholic fatty liver disease; hsa05016 Huntington disease; hsa00190 Oxidative phosphorylation; hsa05012 Parkinson disease; hsa05010 Alzheimer disease; hsa04723 Retrograde endocannabinoid signaling; hsa04714 Thermogenesis; hsa05022 Pathways of neurodegeneration - multiple diseases; hsa05014 Amyotrophic lateral sclerosis; hsa05020 Prion disease; hsa01100 Metabolic pathways	GO:0006091 generation of precursor metabolites and energy; GO:0006119 oxidative phosphorylation; GO:0006120 mitochondrial electron transport, NADH to ubiquinone; GO:0006139 nucleobase-containing compound metabolic process; GO:0006163 purine nucleotide metabolic process; GO:0006725 cellular aromatic compound metabolic process; GO:0006753 nucleoside phosphate metabolic process; GO:0006793 phosphoru…	GO:0005622 intracellular; GO:0005623 cell; GO:0005737 cytoplasm; GO:0005739 mitochondrion; GO:0005740 mitochondrial envelope; GO:0005743 mitochondrial inner membrane; GO:0005746 mitochondrial respirasome; GO:0005747 mitochondrial respiratory chain complex I; GO:0016020 membrane; GO:0019866 organelle inner membrane; GO:0030964 NADH dehydrogenase complex; GO:0031090 organelle membrane; GO:0031966 m…	GO:0003824 catalytic activity; GO:0003954 NADH dehydrogenase activity; GO:0008137 NADH dehydrogenase (ubiquinone) activity; GO:0009055 electron transfer activity; GO:0016491 oxidoreductase activity; GO:0016651 oxidoreductase activity, acting on NAD(P)H; GO:0016655 oxidoreductase activity, acting on NAD(P)H, quinone or similar compound as acceptor; GO:0050136 NADH dehydrogenase (quinone) activity;			C	KOG3196	NADH:ubiquinone oxidoreductase, NDUFV2/24 kD subunit
P22033	Methylmalonyl-CoA mutase, mitochondrial OS=Homo sapiens OX=9606 GN=MMUT PE=1 SV=4	MMUT	0.3984	6.22321e-05	Down	83.134	20.9	12	12	0.580936	0.560817	0.567515	1.39825	1.32042	1.57206	cytoplasm	K01847	MUT; methylmalonyl-CoA mutase [EC:5.4.99.2]	hsa00640 Propanoate metabolism; hsa01200 Carbon metabolism; hsa00630 Glyoxylate and dicarboxylate metabolism; hsa00280 Valine, leucine and isoleucine degradation; hsa01100 Metabolic pathways	GO:0000096 sulfur amino acid metabolic process; GO:0006082 organic acid metabolic process; GO:0006520 cellular amino acid metabolic process; GO:0006725 cellular aromatic compound metabolic process; GO:0006766 vitamin metabolic process; GO:0006767 water-soluble vitamin metabolic process; GO:0006790 sulfur compound metabolic process; GO:0006807 nitrogen compound metabolic process; GO:0007275 multic…	GO:0005622 intracellular; GO:0005623 cell; GO:0005737 cytoplasm; GO:0005739 mitochondrion; GO:0005759 mitochondrial matrix; GO:0031974 membrane-enclosed lumen; GO:0043226 organelle; GO:0043227 membrane-bounded organelle; GO:0043229 intracellular organelle; GO:0043231 intracellular membrane-bounded organelle; GO:0043233 organelle lumen; GO:0070013 intracellular organelle lumen;	GO:0003824 catalytic activity; GO:0003924 GTPase activity; GO:0004494 methylmalonyl-CoA mutase activity; GO:0005488 binding; GO:0005515 protein binding; GO:0008144 drug binding; GO:0016462 pyrophosphatase activity; GO:0016787 hydrolase activity; GO:0016817 hydrolase activity, acting on acid anhydrides; GO:0016818 hydrolase activity, acting on acid anhydrides, in phosphorus-containing anhydrides; …	PF02310	B12 binding domain
O00142	Thymidine kinase 2, mitochondrial OS=Homo sapiens OX=9606 GN=TK2 PE=1 SV=4	TK2	0.3992	1.27741e-05	Down	31.004	27.9	6	6	0.568108	0.550225	0.593533	1.37345	1.50588	1.40881	mitochondria	K00857	tdk; thymidine kinase [EC:2.7.1.21]	hsa00983 Drug metabolism - other enzymes; hsa00240 Pyrimidine metabolism; hsa01100 Metabolic pathways	GO:0000002 mitochondrial genome maintenance; GO:0006139 nucleobase-containing compound metabolic process; GO:0006213 pyrimidine nucleoside metabolic process; GO:0006259 DNA metabolic process; GO:0006260 DNA replication; GO:0006261 DNA-dependent DNA replication; GO:0006264 mitochondrial DNA replication; GO:0006725 cellular aromatic compound metabolic process; GO:0006753 nucleoside phosphate metabo…	GO:0005622 intracellular; GO:0005623 cell; GO:0005737 cytoplasm; GO:0005739 mitochondrion; GO:0005759 mitochondrial matrix; GO:0031974 membrane-enclosed lumen; GO:0043226 organelle; GO:0043227 membrane-bounded organelle; GO:0043229 intracellular organelle; GO:0043231 intracellular membrane-bounded organelle; GO:0043233 organelle lumen; GO:0070013 intracellular organelle lumen;	GO:0003824 catalytic activity; GO:0004137 deoxycytidine kinase activity; GO:0004797 thymidine kinase activity; GO:0016301 kinase activity; GO:0016740 transferase activity; GO:0016772 transferase activity, transferring phosphorus-containing groups; GO:0019136 deoxynucleoside kinase activity; GO:0019205 nucleobase-containing compound kinase activity; GO:0019206 nucleoside kinase activity;	PF01712	Deoxynucleoside kinase	F	KOG4235	Mitochondrial thymidine kinase 2/deoxyguanosine kinase
Q9H172	ATP-binding cassette sub-family G member 4 OS=Homo sapiens OX=9606 GN=ABCG4 PE=1 SV=2	ABCG4	0.3994	0.000299928	Down	71.895	7	4	4	0.513019	0.659837	0.539588	1.46573	1.43581	1.38602	plasma membrane	K05680	ABCG4; ATP-binding cassette, subfamily G (WHITE), member 4	hsa02010 ABC transporters	GO:0006810 transport; GO:0006869 lipid transport; GO:0010876 lipid localization; GO:0015850 organic hydroxy compound transport; GO:0015918 sterol transport; GO:0030301 cholesterol transport; GO:0033036 macromolecule localization; GO:0033344 cholesterol efflux; GO:0051179 localization; GO:0051234 establishment of localization; GO:0055085 transmembrane transport; GO:0071702 organic substance transp…	GO:0005623 cell; GO:0005886 plasma membrane; GO:0016020 membrane; GO:0016021 integral component of membrane; GO:0031224 intrinsic component of membrane; GO:0071944 cell periphery;	GO:0003824 catalytic activity; GO:0005215 transporter activity; GO:0005319 lipid transporter activity; GO:0005488 binding; GO:0005515 protein binding; GO:0015248 sterol transporter activity; GO:0015318 inorganic molecular entity transmembrane transporter activity; GO:0015399 primary active transmembrane transporter activity; GO:0016462 pyrophosphatase activity; GO:0016787 hydrolase activity; GO:0…	PF00005	ABC transporter	Q	KOG0061	Transporter, ABC superfamily (Breast cancer resistance protein)
P00751	Complement factor B OS=Homo sapiens OX=9606 GN=CFB PE=1 SV=2	CFB	0.3996	3.26526e-05	Down	85.532	9.4	7	7	0.569819	0.550961	0.592136	1.54101	1.35489	1.39119	extracellular	K01335	CFB; complement factor B [EC:3.4.21.47]	hsa04610 Complement and coagulation cascades; hsa05150 Staphylococcus aureus infection; hsa05171 Coronavirus disease - COVID-19	GO:0002252 immune effector process; GO:0002253 activation of immune response; GO:0002376 immune system process; GO:0002673 regulation of acute inflammatory response; GO:0002682 regulation of immune system process; GO:0002684 positive regulation of immune system process; GO:0002697 regulation of immune effector process; GO:0002920 regulation of humoral immune response; GO:0006508 proteolysis; GO:0…	GO:0005576 extracellular region; GO:0005615 extracellular space; GO:0005623 cell; GO:0005886 plasma membrane; GO:0016020 membrane; GO:0071944 cell periphery;	GO:0001848 complement binding; GO:0003824 catalytic activity; GO:0004175 endopeptidase activity; GO:0004252 serine-type endopeptidase activity; GO:0005488 binding; GO:0005515 protein binding; GO:0008233 peptidase activity; GO:0008236 serine-type peptidase activity; GO:0016787 hydrolase activity; GO:0017171 serine hydrolase activity; GO:0070011 peptidase activity, acting on L-amino acid peptides; …	PF00084; PF00092; PF00089	Sushi domain (SCR repeat); von Willebrand factor type A domain; Trypsin	E	KOG3627	Trypsin
Q9Y3Q0	N-acetylated-alpha-linked acidic dipeptidase 2 OS=Homo sapiens OX=9606 GN=NAALAD2 PE=1 SV=1	NAALAD2	0.4017	0.000991387	Down	83.59	19.6	12	11	0.48892	0.680369	0.550266	1.30853	1.44777	1.52414	endoplasmic reticulum	K01301			GO:0001505 regulation of neurotransmitter levels; GO:0006082 organic acid metabolic process; GO:0006508 proteolysis; GO:0006520 cellular amino acid metabolic process; GO:0006807 nitrogen compound metabolic process; GO:0008152 metabolic process; GO:0008652 cellular amino acid biosynthetic process; GO:0009056 catabolic process; GO:0009058 biosynthetic process; GO:0009987 cellular process; GO:001605…	GO:0005623 cell; GO:0005886 plasma membrane; GO:0016020 membrane; GO:0016021 integral component of membrane; GO:0031224 intrinsic component of membrane; GO:0071944 cell periphery;	GO:0003824 catalytic activity; GO:0004177 aminopeptidase activity; GO:0004180 carboxypeptidase activity; GO:0008233 peptidase activity; GO:0008236 serine-type peptidase activity; GO:0008238 exopeptidase activity; GO:0008239 dipeptidyl-peptidase activity; GO:0016787 hydrolase activity; GO:0016805 dipeptidase activity; GO:0016810 hydrolase activity, acting on carbon-nitrogen (but not peptide) bonds…	PF04253	Transferrin receptor-like dimerisation domain	OP	KOG2195	Transferrin receptor and related proteins containing the protease-associated (PA) domain
Q9Y581	Insulin-like peptide INSL6 OS=Homo sapiens OX=9606 GN=INSL6 PE=2 SV=2	INSL6	0.4032	2.07296e-05	Down	24.859	31	5	5	0.56049	0.560639	0.603018	1.36296	1.51116	1.40173	extracellular	K05255			GO:0000003 reproduction; GO:0003006 developmental process involved in reproduction; GO:0006928 movement of cell or subcellular component; GO:0007275 multicellular organism development; GO:0007276 gamete generation; GO:0007281 germ cell development; GO:0007283 spermatogenesis; GO:0007286 spermatid development; GO:0007548 sex differentiation; GO:0008406 gonad development; GO:0008584 male gonad deve…		GO:0005102 signaling receptor binding; GO:0005179 hormone activity; GO:0005488 binding; GO:0005515 protein binding; GO:0030545 receptor regulator activity; GO:0048018 receptor ligand activity; GO:0098772 molecular function regulator;	PF00049	Insulin/IGF/Relaxin family
Q9Y6J8	Serine/threonine/tyrosine-interacting-like protein 1 OS=Homo sapiens OX=9606 GN=STYXL1 PE=1 SV=1	STYXL1	0.404	2.50252e-05	Down	35.818	40.6	9	9	0.622061	0.559872	0.544436	1.44448	1.41364	1.41551	cytoplasm	K18047			GO:0007154 cell communication; GO:0007165 signal transduction; GO:0007275 multicellular organism development; GO:0007399 nervous system development; GO:0009892 negative regulation of metabolic process; GO:0009966 regulation of signal transduction; GO:0009967 positive regulation of signal transduction; GO:0009987 cellular process; GO:0010563 negative regulation of phosphorus metabolic process; GO:…	GO:0005622 intracellular; GO:0005623 cell; GO:0005737 cytoplasm; GO:0005739 mitochondrion; GO:0043226 organelle; GO:0043227 membrane-bounded organelle; GO:0043229 intracellular organelle; GO:0043231 intracellular membrane-bounded organelle;	GO:0001691 pseudophosphatase activity; GO:0004857 enzyme inhibitor activity; GO:0004864 protein phosphatase inhibitor activity; GO:0005488 binding; GO:0005515 protein binding; GO:0019208 phosphatase regulator activity; GO:0019212 phosphatase inhibitor activity; GO:0019888 protein phosphatase regulator activity; GO:0019899 enzyme binding; GO:0019902 phosphatase binding; GO:0019903 protein phosphat…	PF00581; PF00782	Rhodanese-like domain; Dual specificity phosphatase, catalytic domain	V	KOG1716	Dual specificity phosphatase
O95170	CMT1A duplicated region transcript 1 protein OS=Homo sapiens OX=9606 GN=CDRT1 PE=2 SV=3	CDRT1	0.4042	2.5007e-05	Down	85.369	9.7	6	6	0.530126	0.594172	0.602797	1.42677	1.40734	1.4388	cytoplasm	K10266			GO:0000209 protein polyubiquitination; GO:0006464 cellular protein modification process; GO:0006807 nitrogen compound metabolic process; GO:0008152 metabolic process; GO:0009987 cellular process; GO:0016567 protein ubiquitination; GO:0019538 protein metabolic process; GO:0032446 protein modification by small protein conjugation; GO:0036211 protein modification process; GO:0043170 macromolecule me…	GO:0005622 intracellular; GO:0005623 cell; GO:0005737 cytoplasm; GO:0005829 cytosol;	GO:0003824 catalytic activity; GO:0004842 ubiquitin-protein transferase activity; GO:0016740 transferase activity; GO:0019787 ubiquitin-like protein transferase activity; GO:0140096 catalytic activity, acting on a protein;			S	KOG0274	Cdc4 and related F-box and WD-40 proteins
P26440	Isovaleryl-CoA dehydrogenase, mitochondrial OS=Homo sapiens OX=9606 GN=IVD PE=1 SV=2	IVD	0.4042	8.4786e-07	Down	46.65	31.9	12	12	0.589037	0.557682	0.580282	1.42091	1.44192	1.41017	mitochondria	K00253	IVD; isovaleryl-CoA dehydrogenase [EC:1.3.8.4]	hsa00280 Valine, leucine and isoleucine degradation; hsa01100 Metabolic pathways	GO:0006082 organic acid metabolic process; GO:0006520 cellular amino acid metabolic process; GO:0006551 leucine metabolic process; GO:0006552 leucine catabolic process; GO:0006629 lipid metabolic process; GO:0006631 fatty acid metabolic process; GO:0006635 fatty acid beta-oxidation; GO:0006807 nitrogen compound metabolic process; GO:0008152 metabolic process; GO:0009056 catabolic process; GO:0009…	GO:0005622 intracellular; GO:0005623 cell; GO:0005634 nucleus; GO:0005654 nucleoplasm; GO:0005737 cytoplasm; GO:0005739 mitochondrion; GO:0005740 mitochondrial envelope; GO:0005759 mitochondrial matrix; GO:0016020 membrane; GO:0031090 organelle membrane; GO:0031966 mitochondrial membrane; GO:0031967 organelle envelope; GO:0031974 membrane-enclosed lumen; GO:0031975 envelope; GO:0031981 nuclear lu…	GO:0003824 catalytic activity; GO:0003995 acyl-CoA dehydrogenase activity; GO:0008470 isovaleryl-CoA dehydrogenase activity; GO:0016491 oxidoreductase activity; GO:0016627 oxidoreductase activity, acting on the CH-CH group of donors;	PF02771; PF02770; PF00441	Acyl-CoA dehydrogenase, N-terminal domain; Acyl-CoA dehydrogenase, middle domain; Acyl-CoA dehydrogenase, C-terminal domain	C	KOG0141	Isovaleryl-CoA dehydrogenase
A6NFA0	Protein FAM205C OS=Homo sapiens OX=9606 GN=FAM205C PE=3 SV=2	FAM205C	0.4051	2.18883e-05	Down	37.612	20.4	7	7	0.539392	0.585501	0.604897	1.39231	1.48154	1.39636	extracellular
Q16539	Mitogen-activated protein kinase 14 OS=Homo sapiens OX=9606 GN=MAPK14 PE=1 SV=3	MAPK14	0.4074	0.00509043	Down	41.293	6.9	2	2	0.614501	0.550058	0.572203	1.50961	1.03086	1.72277	cytoplasm	K04441	P38; p38 MAP kinase [EC:2.7.11.24]	hsa05120 Epithelial cell signaling in Helicobacter pylori infection; hsa04622 RIG-I-like receptor signaling pathway; hsa04935 Growth hormone synthesis, secretion and action; hsa04261 Adrenergic signaling in cardiomyocytes; hsa04621 NOD-like receptor signaling pathway; hsa04714 Thermogenesis; hsa05205 Proteoglycans in cancer; hsa04370 VEGF signaling pathway; hsa05022 Pathways of neurodegeneration …	GO:0000003 reproduction; GO:0000075 cell cycle checkpoint; GO:0000077 DNA damage checkpoint; GO:0000165 MAPK cascade; GO:0000187 activation of MAPK activity; GO:0000902 cell morphogenesis; GO:0001501 skeletal system development; GO:0001502 cartilage condensation; GO:0001525 angiogenesis; GO:0001568 blood vessel development; GO:0001775 cell activation; GO:0001817 regulation of cytokine production;…	GO:0000922 spindle pole; GO:0005576 extracellular region; GO:0005622 intracellular; GO:0005623 cell; GO:0005634 nucleus; GO:0005654 nucleoplasm; GO:0005737 cytoplasm; GO:0005739 mitochondrion; GO:0005819 spindle; GO:0005829 cytosol; GO:0005856 cytoskeleton; GO:0012505 endomembrane system; GO:0015630 microtubule cytoskeleton; GO:0016604 nuclear body; GO:0016607 nuclear speck; GO:0030141 secretory …	GO:0000166 nucleotide binding; GO:0003824 catalytic activity; GO:0004672 protein kinase activity; GO:0004674 protein serine/threonine kinase activity; GO:0004707 MAP kinase activity; GO:0004708 MAP kinase kinase activity; GO:0004712 protein serine/threonine/tyrosine kinase activity; GO:0005488 binding; GO:0005515 protein binding; GO:0005524 ATP binding; GO:0008022 protein C-terminus binding; GO:0…	PF00069	Protein kinase domain	T	KOG0660	Mitogen-activated protein kinase
A6NNW6	Enolase 4 OS=Homo sapiens OX=9606 GN=ENO4 PE=2 SV=4	ENO4	0.4077	0.000128636	Down	68.464	13.6	7	7	0.543015	0.599726	0.594925	1.37487	1.5692	1.31826	cytoplasm	K01689	ENO; enolase [EC:4.2.1.11]	hsa04066 HIF-1 signaling pathway; hsa00010 Glycolysis / Gluconeogenesis; hsa01200 Carbon metabolism; hsa03018 RNA degradation; hsa01230 Biosynthesis of amino acids; hsa01100 Metabolic pathways	GO:0005975 carbohydrate metabolic process; GO:0006082 organic acid metabolic process; GO:0006090 pyruvate metabolic process; GO:0006091 generation of precursor metabolites and energy; GO:0006096 glycolytic process; GO:0006139 nucleobase-containing compound metabolic process; GO:0006163 purine nucleotide metabolic process; GO:0006164 purine nucleotide biosynthetic process; GO:0006165 nucleoside di…	GO:0005623 cell; GO:0005929 cilium; GO:0031514 motile cilium; GO:0036126 sperm flagellum; GO:0042995 cell projection; GO:0043226 organelle; GO:0097228 sperm principal piece; GO:0097729 9+2 motile cilium; GO:0120025 plasma membrane bounded cell projection;	GO:0003824 catalytic activity; GO:0004634 phosphopyruvate hydratase activity; GO:0005488 binding; GO:0005515 protein binding; GO:0016829 lyase activity; GO:0016835 carbon-oxygen lyase activity; GO:0016836 hydro-lyase activity; GO:0046982 protein heterodimerization activity; GO:0046983 protein dimerization activity;	PF00113	Enolase, C-terminal TIM barrel domain	G	KOG2670	Enolase
Q8NCS7	Choline transporter-like protein 5 OS=Homo sapiens OX=9606 GN=SLC44A5 PE=2 SV=5	SLC44A5	0.4098	0.00063217	Down	81.693	16.7	10	10	0.488757	0.656001	0.599383	1.47763	1.44633	1.3319	plasma membrane	K15377	SLC44A2_4_5; solute carrier family 44 (choline transporter-like protein), member 2/4/5	hsa05231 Choline metabolism in cancer	GO:0006629 lipid metabolic process; GO:0006644 phospholipid metabolic process; GO:0006650 glycerophospholipid metabolic process; GO:0006656 phosphatidylcholine biosynthetic process; GO:0006793 phosphorus metabolic process; GO:0006796 phosphate-containing compound metabolic process; GO:0006807 nitrogen compound metabolic process; GO:0006810 transport; GO:0006811 ion transport; GO:0006812 cation tr…	GO:0005623 cell; GO:0005886 plasma membrane; GO:0016020 membrane; GO:0071944 cell periphery;	GO:0005215 transporter activity; GO:0005326 neurotransmitter transmembrane transporter activity; GO:0008324 cation transmembrane transporter activity; GO:0008519 ammonium transmembrane transporter activity; GO:0015075 ion transmembrane transporter activity; GO:0015101 organic cation transmembrane transporter activity; GO:0015220 choline transmembrane transporter activity; GO:0022857 transmembrane…			I	KOG1362	Choline transporter-like protein
A5PLK6	Regulator of G-protein signaling protein-like OS=Homo sapiens OX=9606 GN=RGSL1 PE=2 SV=1	RGSL1	0.4136	0.0233964	Down	125.69	2.8	2	2	0.643265	0.588582	0.523773	2.1041	1.05647	1.08381	nucleus				GO:0043085 positive regulation of catalytic activity; GO:0043087 regulation of GTPase activity; GO:0043547 positive regulation of GTPase activity; GO:0044093 positive regulation of molecular function; GO:0050790 regulation of catalytic activity; GO:0051336 regulation of hydrolase activity; GO:0051345 positive regulation of hydrolase activity; GO:0065007 biological regulation; GO:0065009 regulatio…	GO:0005622 intracellular; GO:0005623 cell; GO:0005737 cytoplasm; GO:0005886 plasma membrane; GO:0016020 membrane; GO:0071944 cell periphery;	GO:0005096 GTPase activator activity; GO:0008047 enzyme activator activity; GO:0030234 enzyme regulator activity; GO:0030695 GTPase regulator activity; GO:0060589 nucleoside-triphosphatase regulator activity; GO:0098772 molecular function regulator;	PF00615	Regulator of G protein signaling domain
Q9Y615	Actin-like protein 7A OS=Homo sapiens OX=9606 GN=ACTL7A PE=1 SV=1	ACTL7A	0.4157	4.88038e-07	Down	48.643	46	18	18	0.583219	0.574657	0.603844	1.40681	1.41518	1.41629	cytoplasm				GO:0006996 organelle organization; GO:0007010 cytoskeleton organization; GO:0009987 cellular process; GO:0016043 cellular component organization; GO:0071840 cellular component organization or biogenesis;	GO:0001673 male germ cell nucleus; GO:0005622 intracellular; GO:0005623 cell; GO:0005634 nucleus; GO:0005737 cytoplasm; GO:0005856 cytoskeleton; GO:0005929 cilium; GO:0031514 motile cilium; GO:0032991 protein-containing complex; GO:0042995 cell projection; GO:0043073 germ cell nucleus; GO:0043226 organelle; GO:0043227 membrane-bounded organelle; GO:0043228 non-membrane-bounded organelle; GO:00432…	GO:0005198 structural molecule activity; GO:0005200 structural constituent of cytoskeleton;			Z	KOG0676	Actin and related proteins
P07737	Profilin-1 OS=Homo sapiens OX=9606 GN=PFN1 PE=1 SV=2	PFN1	0.4167	1.53999e-08	Down	15.054	70	9	9	0.594885	0.585641	0.584172	1.40931	1.41887	1.40712	cytoplasm	K05759	PFN; profilin	hsa04810 Regulation of actin cytoskeleton; hsa05132 Salmonella infection; hsa04015 Rap1 signaling pathway; hsa05014 Amyotrophic lateral sclerosis; hsa05131 Shigellosis	GO:0001838 embryonic epithelial tube formation; GO:0001841 neural tube formation; GO:0001843 neural tube closure; GO:0002009 morphogenesis of an epithelium; GO:0006355 regulation of transcription, DNA-templated; GO:0006357 regulation of transcription by RNA polymerase II; GO:0006996 organelle organization; GO:0007010 cytoskeleton organization; GO:0007015 actin filament organization; GO:0007154 ce…	GO:0005576 extracellular region; GO:0005622 intracellular; GO:0005623 cell; GO:0005634 nucleus; GO:0005737 cytoplasm; GO:0005829 cytosol; GO:0005856 cytoskeleton; GO:0005938 cell cortex; GO:0042995 cell projection; GO:0043005 neuron projection; GO:0043226 organelle; GO:0043227 membrane-bounded organelle; GO:0043228 non-membrane-bounded organelle; GO:0043229 intracellular organelle; GO:0043231 int…	GO:0000166 nucleotide binding; GO:0000774 adenyl-nucleotide exchange factor activity; GO:0003779 actin binding; GO:0003785 actin monomer binding; GO:0005102 signaling receptor binding; GO:0005488 binding; GO:0005515 protein binding; GO:0005543 phospholipid binding; GO:0005546 phosphatidylinositol-4,5-bisphosphate binding; GO:0008092 cytoskeletal protein binding; GO:0008289 lipid binding; GO:00170…	PF00235	Profilin	Z	KOG1755	Profilin
Q5JRM2	Uncharacterized protein CXorf66 OS=Homo sapiens OX=9606 GN=CXorf66 PE=1 SV=1	CXorf66	0.4168	7.62359e-05	Down	39.943	34.3	10	10	0.582703	0.564801	0.617672	1.29536	1.42516	1.51431	extracellular
O75323	Protein NipSnap homolog 2 OS=Homo sapiens OX=9606 GN=NIPSNAP2 PE=1 SV=1	NIPSNAP2	0.4175	5.94252e-05	Down	33.742	21	5	5	0.62396	0.536429	0.606749	1.42345	1.36544	1.44397	mitochondria				GO:0006091 generation of precursor metabolites and energy; GO:0006119 oxidative phosphorylation; GO:0006139 nucleobase-containing compound metabolic process; GO:0006163 purine nucleotide metabolic process; GO:0006164 purine nucleotide biosynthetic process; GO:0006725 cellular aromatic compound metabolic process; GO:0006753 nucleoside phosphate metabolic process; GO:0006754 ATP biosynthetic proces…	GO:0005622 intracellular; GO:0005623 cell; GO:0005737 cytoplasm; GO:0005739 mitochondrion; GO:0005740 mitochondrial envelope; GO:0005741 mitochondrial outer membrane; GO:0016020 membrane; GO:0019867 outer membrane; GO:0031090 organelle membrane; GO:0031966 mitochondrial membrane; GO:0031967 organelle envelope; GO:0031968 organelle outer membrane; GO:0031975 envelope; GO:0043226 organelle; GO:0043…		PF07978	NIPSNAP	S	KOG2883	NIPSNAP1 protein
O15382	Branched-chain-amino-acid aminotransferase, mitochondrial OS=Homo sapiens OX=9606 GN=BCAT2 PE=1 SV=2	BCAT2	0.4176	1.83133e-05	Down	44.287	37.2	11	11	0.55114	0.591271	0.625066	1.40772	1.42237	1.40244	mitochondria	K00826	E2.6.1.42; branched-chain amino acid aminotransferase [EC:2.6.1.42]	hsa00770 Pantothenate and CoA biosynthesis; hsa00270 Cysteine and methionine metabolism; hsa01210 2-Oxocarboxylic acid metabolism; hsa01240 Biosynthesis of cofactors; hsa00290 Valine, leucine and isoleucine biosynthesis; hsa01230 Biosynthesis of amino acids; hsa00280 Valine, leucine and isoleucine degradation; hsa01100 Metabolic pathways	GO:0006082 organic acid metabolic process; GO:0006520 cellular amino acid metabolic process; GO:0006549 isoleucine metabolic process; GO:0006550 isoleucine catabolic process; GO:0006551 leucine metabolic process; GO:0006573 valine metabolic process; GO:0006807 nitrogen compound metabolic process; GO:0006810 transport; GO:0007275 multicellular organism development; GO:0007589 body fluid secretion;…	GO:0005622 intracellular; GO:0005623 cell; GO:0005634 nucleus; GO:0005737 cytoplasm; GO:0005739 mitochondrion; GO:0005759 mitochondrial matrix; GO:0031974 membrane-enclosed lumen; GO:0043226 organelle; GO:0043227 membrane-bounded organelle; GO:0043229 intracellular organelle; GO:0043231 intracellular membrane-bounded organelle; GO:0043233 organelle lumen; GO:0070013 intracellular organelle lumen;	GO:0003824 catalytic activity; GO:0004084 branched-chain-amino-acid transaminase activity; GO:0008483 transaminase activity; GO:0016740 transferase activity; GO:0016769 transferase activity, transferring nitrogenous groups;	PF01063	Aminotransferase class IV	E	KOG0975	Branched chain aminotransferase BCAT1, pyridoxal phosphate enzymes type IV superfamily
Q8WWU5	T-complex protein 11 homolog OS=Homo sapiens OX=9606 GN=TCP11 PE=1 SV=1	TCP11	0.4179	1.82287e-07	Down	56.14	51.5	18	18	0.582402	0.601589	0.584489	1.41219	1.42238	1.39695	cytoplasm				GO:0007154 cell communication; GO:0007165 signal transduction; GO:0007275 multicellular organism development; GO:0009966 regulation of signal transduction; GO:0009987 cellular process; GO:0010646 regulation of cell communication; GO:0010737 protein kinase A signaling; GO:0017157 regulation of exocytosis; GO:0023051 regulation of signaling; GO:0023052 signaling; GO:0032501 multicellular organismal…	GO:0001669 acrosomal vesicle; GO:0005622 intracellular; GO:0005623 cell; GO:0005737 cytoplasm; GO:0005929 cilium; GO:0012505 endomembrane system; GO:0030141 secretory granule; GO:0031410 cytoplasmic vesicle; GO:0031514 motile cilium; GO:0031982 vesicle; GO:0036126 sperm flagellum; GO:0042995 cell projection; GO:0043226 organelle; GO:0043227 membrane-bounded organelle; GO:0043229 intracellular org…				T	KOG1981	SOK1 kinase belonging to the STE20/SPS1/GC kinase family
P20155	Serine protease inhibitor Kazal-type 2 OS=Homo sapiens OX=9606 GN=SPINK2 PE=1 SV=2	SPINK2	0.4207	9.24734e-06	Down	9.2909	35.7	2	2	0.603855	0.590668	0.582304	1.4175	1.47177	1.3339	extracellular	K23418			GO:0000003 reproduction; GO:0002176 male germ cell proliferation; GO:0003006 developmental process involved in reproduction; GO:0007275 multicellular organism development; GO:0007276 gamete generation; GO:0007281 germ cell development; GO:0007283 spermatogenesis; GO:0007286 spermatid development; GO:0007548 sex differentiation; GO:0008283 cell population proliferation; GO:0008406 gonad developmen…	GO:0001669 acrosomal vesicle; GO:0005576 extracellular region; GO:0005615 extracellular space; GO:0005622 intracellular; GO:0005623 cell; GO:0005737 cytoplasm; GO:0012505 endomembrane system; GO:0030141 secretory granule; GO:0031410 cytoplasmic vesicle; GO:0031982 vesicle; GO:0042995 cell projection; GO:0043005 neuron projection; GO:0043226 organelle; GO:0043227 membrane-bounded organelle; GO:004…	GO:0004857 enzyme inhibitor activity; GO:0004866 endopeptidase inhibitor activity; GO:0004867 serine-type endopeptidase inhibitor activity; GO:0030234 enzyme regulator activity; GO:0030414 peptidase inhibitor activity; GO:0061134 peptidase regulator activity; GO:0061135 endopeptidase regulator activity; GO:0098772 molecular function regulator;	PF00050	Kazal-type serine protease inhibitor domain	S	KOG3649	FOG: Kazal-type serine protease inhibitor domain
Q9NVV0	Trimeric intracellular cation channel type B OS=Homo sapiens OX=9606 GN=TMEM38B PE=1 SV=1	TMEM38B	0.4211	1.78073e-05	Down	32.509	16.2	4	4	0.596942	0.591215	0.589715	1.47911	1.31197	1.43105	plasma membrane	K24013			GO:0006810 transport; GO:0006811 ion transport; GO:0006812 cation transport; GO:0006813 potassium ion transport; GO:0009987 cellular process; GO:0015672 monovalent inorganic cation transport; GO:0030001 metal ion transport; GO:0034220 ion transmembrane transport; GO:0051179 localization; GO:0051234 establishment of localization; GO:0055085 transmembrane transport; GO:0071805 potassium ion transme…	GO:0005622 intracellular; GO:0005623 cell; GO:0005634 nucleus; GO:0005635 nuclear envelope; GO:0005737 cytoplasm; GO:0005783 endoplasmic reticulum; GO:0005789 endoplasmic reticulum membrane; GO:0012505 endomembrane system; GO:0016020 membrane; GO:0016528 sarcoplasm; GO:0016529 sarcoplasmic reticulum; GO:0031090 organelle membrane; GO:0031965 nuclear membrane; GO:0031967 organelle envelope; GO:003…	GO:0005215 transporter activity; GO:0005216 ion channel activity; GO:0005227 calcium activated cation channel activity; GO:0005261 cation channel activity; GO:0005267 potassium channel activity; GO:0008324 cation transmembrane transporter activity; GO:0015075 ion transmembrane transporter activity; GO:0015077 monovalent inorganic cation transmembrane transporter activity; GO:0015079 potassium ion…			S	KOG3944	Uncharacterized conserved protein
P50336	Protoporphyrinogen oxidase OS=Homo sapiens OX=9606 GN=PPOX PE=1 SV=1	PPOX	0.4212	0.00173267	Down	50.765	14.5	5	5	0.584715	0.640111	0.553418	1.70991	1.19811	1.31374	extracellular	K00231	PPOX; protoporphyrinogen/coproporphyrinogen III oxidase [EC:1.3.3.4 1.3.3.15]	hsa01240 Biosynthesis of cofactors; hsa00860 Porphyrin and chlorophyll metabolism; hsa01100 Metabolic pathways	GO:0006725 cellular aromatic compound metabolic process; GO:0006778 porphyrin-containing compound metabolic process; GO:0006779 porphyrin-containing compound biosynthetic process; GO:0006783 heme biosynthetic process; GO:0006807 nitrogen compound metabolic process; GO:0008152 metabolic process; GO:0009058 biosynthetic process; GO:0009987 cellular process; GO:0018130 heterocycle biosynthetic proce…	GO:0005622 intracellular; GO:0005623 cell; GO:0005737 cytoplasm; GO:0005739 mitochondrion; GO:0005740 mitochondrial envelope; GO:0005743 mitochondrial inner membrane; GO:0005758 mitochondrial intermembrane space; GO:0016020 membrane; GO:0016021 integral component of membrane; GO:0019866 organelle inner membrane; GO:0031090 organelle membrane; GO:0031224 intrinsic component of membrane; GO:0031300…	GO:0000166 nucleotide binding; GO:0003824 catalytic activity; GO:0004729 oxygen-dependent protoporphyrinogen oxidase activity; GO:0005488 binding; GO:0016491 oxidoreductase activity; GO:0016627 oxidoreductase activity, acting on the CH-CH group of donors; GO:0016634 oxidoreductase activity, acting on the CH-CH group of donors, oxygen as acceptor; GO:0036094 small molecule binding; GO:0043167 ion …	PF01593	Flavin containing amine oxidoreductase	H	KOG1276	Protoporphyrinogen oxidase
Q9UMX0	Ubiquilin-1 OS=Homo sapiens OX=9606 GN=UBQLN1 PE=1 SV=2	UBQLN1	0.4221	5.51385e-05	Down	62.518	13.9	5	5	0.633487	0.567426	0.580034	1.35321	1.50291	1.36293	nucleus	K04523	UBQLN; ubiquilin	hsa05014 Amyotrophic lateral sclerosis; hsa04141 Protein processing in endoplasmic reticulum	GO:0000045 autophagosome assembly; GO:0001666 response to hypoxia; GO:0002682 regulation of immune system process; GO:0002683 negative regulation of immune system process; GO:0006508 proteolysis; GO:0006511 ubiquitin-dependent protein catabolic process; GO:0006807 nitrogen compound metabolic process; GO:0006914 autophagy; GO:0006950 response to stress; GO:0006996 organelle organization; GO:000703…	GO:0005622 intracellular; GO:0005623 cell; GO:0005634 nucleus; GO:0005654 nucleoplasm; GO:0005737 cytoplasm; GO:0005773 vacuole; GO:0005776 autophagosome; GO:0005783 endoplasmic reticulum; GO:0005829 cytosol; GO:0005886 plasma membrane; GO:0012505 endomembrane system; GO:0016020 membrane; GO:0016234 inclusion body; GO:0016235 aggresome; GO:0031974 membrane-enclosed lumen; GO:0031981 nuclear lumen…	GO:0005102 signaling receptor binding; GO:0005488 binding; GO:0005515 protein binding; GO:0019215 intermediate filament binding; GO:0019899 enzyme binding; GO:0019900 kinase binding; GO:0019904 protein domain specific binding; GO:0031593 polyubiquitin modification-dependent protein binding; GO:0042802 identical protein binding; GO:0044877 protein-containing complex binding; GO:0140030 modificatio…	PF00240; PF00627	Ubiquitin family; UBA/TS-N domain	O	KOG0010	Ubiquitin-like protein
Q8NCN5	Pyruvate dehydrogenase phosphatase regulatory subunit, mitochondrial OS=Homo sapiens OX=9606 GN=PDPR PE=1 SV=2	PDPR	0.4237	8.58013e-06	Down	99.363	17.3	13	13	0.586654	0.612296	0.586688	1.46856	1.3416	1.4042	mitochondria	K17509			GO:0006140 regulation of nucleotide metabolic process; GO:0006464 cellular protein modification process; GO:0006470 protein dephosphorylation; GO:0006793 phosphorus metabolic process; GO:0006796 phosphate-containing compound metabolic process; GO:0006807 nitrogen compound metabolic process; GO:0008152 metabolic process; GO:0009889 regulation of biosynthetic process; GO:0009987 cellular process; G…	GO:0005622 intracellular; GO:0005623 cell; GO:0005737 cytoplasm; GO:0005739 mitochondrion; GO:0005759 mitochondrial matrix; GO:0031974 membrane-enclosed lumen; GO:0043226 organelle; GO:0043227 membrane-bounded organelle; GO:0043229 intracellular organelle; GO:0043231 intracellular membrane-bounded organelle; GO:0043233 organelle lumen; GO:0070013 intracellular organelle lumen;	GO:0003824 catalytic activity; GO:0004721 phosphoprotein phosphatase activity; GO:0004741 [pyruvate dehydrogenase (lipoamide)] phosphatase activity; GO:0016491 oxidoreductase activity; GO:0016787 hydrolase activity; GO:0016788 hydrolase activity, acting on ester bonds; GO:0016791 phosphatase activity; GO:0042578 phosphoric ester hydrolase activity; GO:0140096 catalytic activity, acting on a prote…	PF01266; PF01571; PF08669	FAD dependent oxidoreductase; Aminomethyltransferase folate-binding domain; Glycine cleavage T-protein C-terminal barrel domain	C	KOG2844	Dimethylglycine dehydrogenase precursor
Q9NZC3	Glycerophosphodiester phosphodiesterase 1 OS=Homo sapiens OX=9606 GN=GDE1 PE=1 SV=1	GDE1	0.4239	2.36531e-05	Down	37.718	34.4	11	11	0.600628	0.625546	0.559925	1.45981	1.3606	1.39349	endoplasmic reticulum	K19179			GO:0006066 alcohol metabolic process; GO:0006576 cellular biogenic amine metabolic process; GO:0006629 lipid metabolic process; GO:0006644 phospholipid metabolic process; GO:0006650 glycerophospholipid metabolic process; GO:0006793 phosphorus metabolic process; GO:0006796 phosphate-containing compound metabolic process; GO:0006807 nitrogen compound metabolic process; GO:0007154 cell communication…	GO:0005623 cell; GO:0005886 plasma membrane; GO:0005887 integral component of plasma membrane; GO:0016020 membrane; GO:0016021 integral component of membrane; GO:0031224 intrinsic component of membrane; GO:0031226 intrinsic component of plasma membrane; GO:0071944 cell periphery;	GO:0003824 catalytic activity; GO:0004620 phospholipase activity; GO:0004622 lysophospholipase activity; GO:0008081 phosphoric diester hydrolase activity; GO:0008889 glycerophosphodiester phosphodiesterase activity; GO:0016298 lipase activity; GO:0016787 hydrolase activity; GO:0016788 hydrolase activity, acting on ester bonds; GO:0042578 phosphoric ester hydrolase activity; GO:0047395 glycerophos…			C	KOG2258	Glycerophosphoryl diester phosphodiesterase
Q8N0X2	Sperm-associated antigen 16 protein OS=Homo sapiens OX=9606 GN=SPAG16 PE=1 SV=2	SPAG16	0.4242	1.07485e-05	Down	70.817	39.5	16	16	0.583163	0.627915	0.576	1.36324	1.40782	1.44186	mitochondria				GO:0000003 reproduction; GO:0000226 microtubule cytoskeleton organization; GO:0001539 cilium or flagellum-dependent cell motility; GO:0001578 microtubule bundle formation; GO:0003006 developmental process involved in reproduction; GO:0003341 cilium movement; GO:0006928 movement of cell or subcellular component; GO:0006996 organelle organization; GO:0007010 cytoskeleton organization; GO:0007017 mi…	GO:0005622 intracellular; GO:0005623 cell; GO:0005634 nucleus; GO:0005737 cytoplasm; GO:0005856 cytoskeleton; GO:0005929 cilium; GO:0005930 axoneme; GO:0032838 plasma membrane bounded cell projection cytoplasm; GO:0042995 cell projection; GO:0043226 organelle; GO:0043227 membrane-bounded organelle; GO:0043228 non-membrane-bounded organelle; GO:0043229 intracellular organelle; GO:0043231 intracell…	GO:0005488 binding; GO:0005515 protein binding; GO:0019899 enzyme binding; GO:0019900 kinase binding; GO:0019901 protein kinase binding;			Z	KOG0295	WD40 repeat-containing protein
P16562	Cysteine-rich secretory protein 2 OS=Homo sapiens OX=9606 GN=CRISP2 PE=1 SV=1	CRISP2	0.4254	1.71968e-06	Down	27.259	46.5	9	9	0.60462	0.597266	0.58871	1.35269	1.43267	1.42405	extracellular	K19919			GO:0007155 cell adhesion; GO:0022610 biological adhesion; GO:0098609 cell-cell adhesion;	GO:0005576 extracellular region; GO:0005615 extracellular space;		PF00188; PF08562	Cysteine-rich secretory protein family; Crisp	S	KOG3017	Defense-related protein containing SCP domain
Q92882	Osteoclast-stimulating factor 1 OS=Homo sapiens OX=9606 GN=OSTF1 PE=1 SV=2	OSTF1	0.4259	0.000300143	Down	23.787	43.9	6	6	0.523149	0.607512	0.661508	1.46521	1.39866	1.34397	mitochondria				GO:0001503 ossification; GO:0001775 cell activation; GO:0002252 immune effector process; GO:0002263 cell activation involved in immune response; GO:0002274 myeloid leukocyte activation; GO:0002275 myeloid cell activation involved in immune response; GO:0002283 neutrophil activation involved in immune response; GO:0002366 leukocyte activation involved in immune response; GO:0002376 immune system p…	GO:0005622 intracellular; GO:0005623 cell; GO:0005737 cytoplasm; GO:0012505 endomembrane system; GO:0030141 secretory granule; GO:0031410 cytoplasmic vesicle; GO:0031974 membrane-enclosed lumen; GO:0031982 vesicle; GO:0031983 vesicle lumen; GO:0034774 secretory granule lumen; GO:0043226 organelle; GO:0043227 membrane-bounded organelle; GO:0043229 intracellular organelle; GO:0043233 organelle lume…	GO:0005488 binding; GO:0005515 protein binding; GO:0017124 SH3 domain binding; GO:0019904 protein domain specific binding;	PF00018	SH3 domain
Q5T440	Putative transferase CAF17, mitochondrial OS=Homo sapiens OX=9606 GN=IBA57 PE=1 SV=1	IBA57	0.426	5.08127e-05	Down	38.155	27.2	7	7	0.637971	0.569111	0.585261	1.48586	1.33739	1.38441	mitochondria	K22073			GO:0006790 sulfur compound metabolic process; GO:0008152 metabolic process; GO:0009987 cellular process; GO:0016043 cellular component organization; GO:0016226 iron-sulfur cluster assembly; GO:0022607 cellular component assembly; GO:0031163 metallo-sulfur cluster assembly; GO:0044085 cellular component biogenesis; GO:0044237 cellular metabolic process; GO:0051186 cofactor metabolic process; GO:00…	GO:0005622 intracellular; GO:0005623 cell; GO:0005737 cytoplasm; GO:0005739 mitochondrion; GO:0005759 mitochondrial matrix; GO:0031974 membrane-enclosed lumen; GO:0043226 organelle; GO:0043227 membrane-bounded organelle; GO:0043229 intracellular organelle; GO:0043231 intracellular membrane-bounded organelle; GO:0043233 organelle lumen; GO:0070013 intracellular organelle lumen;				K	KOG2929	Transcription factor, component of CCR4 transcriptional complex
Q9UBR2	Cathepsin Z OS=Homo sapiens OX=9606 GN=CTSZ PE=1 SV=1	CTSZ	0.4261	9.29176e-07	Down	33.868	17.5	5	5	0.589477	0.59101	0.612185	1.37025	1.42402	1.41307	extracellular	K08568	CTSZ; cathepsin X [EC:3.4.18.1]	hsa04142 Lysosome; hsa04210 Apoptosis	GO:0001763 morphogenesis of a branching structure; GO:0001775 cell activation; GO:0001990 regulation of systemic arterial blood pressure by hormone; GO:0001991 regulation of systemic arterial blood pressure by circulatory renin-angiotensin; GO:0002002 regulation of angiotensin levels in blood; GO:0002003 angiotensin maturation; GO:0002009 morphogenesis of an epithelium; GO:0002252 immune effector…	GO:0000323 lytic vacuole; GO:0005576 extracellular region; GO:0005615 extracellular space; GO:0005622 intracellular; GO:0005623 cell; GO:0005737 cytoplasm; GO:0005764 lysosome; GO:0005773 vacuole; GO:0005783 endoplasmic reticulum; GO:0005788 endoplasmic reticulum lumen; GO:0005793 endoplasmic reticulum-Golgi intermediate compartment; GO:0005798 Golgi-associated vesicle; GO:0005886 plasma membrane…	GO:0003824 catalytic activity; GO:0004175 endopeptidase activity; GO:0004180 carboxypeptidase activity; GO:0004197 cysteine-type endopeptidase activity; GO:0008233 peptidase activity; GO:0008234 cysteine-type peptidase activity; GO:0008238 exopeptidase activity; GO:0016787 hydrolase activity; GO:0070011 peptidase activity, acting on L-amino acid peptides; GO:0140096 catalytic activity, acting on …	PF00112	Papain family cysteine protease	O	KOG1543	Cysteine proteinase Cathepsin L
Q9NUQ9	CYFIP-related Rac1 interactor B OS=Homo sapiens OX=9606 GN=CYRIB PE=1 SV=1	CYRIB	0.4276	0.000239574	Down	36.748	39.2	9	8	0.522304	0.624173	0.650794	1.41614	1.42045	1.36614	cytoplasm				GO:0001817 regulation of cytokine production; GO:0001819 positive regulation of cytokine production; GO:0001910 regulation of leukocyte mediated cytotoxicity; GO:0001912 positive regulation of leukocyte mediated cytotoxicity; GO:0001914 regulation of T cell mediated cytotoxicity; GO:0001916 positive regulation of T cell mediated cytotoxicity; GO:0002576 platelet degranulation; GO:0002682 regulati…	GO:0005576 extracellular region; GO:0005622 intracellular; GO:0005623 cell; GO:0005737 cytoplasm; GO:0005929 cilium; GO:0012505 endomembrane system; GO:0030141 secretory granule; GO:0031091 platelet alpha granule; GO:0031093 platelet alpha granule lumen; GO:0031410 cytoplasmic vesicle; GO:0031974 membrane-enclosed lumen; GO:0031982 vesicle; GO:0031983 vesicle lumen; GO:0034774 secretory granule l…	GO:0005102 signaling receptor binding; GO:0005488 binding; GO:0005515 protein binding; GO:0023023 MHC protein complex binding; GO:0023025 MHC class Ib protein complex binding; GO:0023029 MHC class Ib protein binding; GO:0023030 MHC class Ib protein binding, via antigen binding groove; GO:0042287 MHC protein binding; GO:0044877 protein-containing complex binding;			S	KOG3951	Uncharacterized conserved protein
P15104	Glutamine synthetase OS=Homo sapiens OX=9606 GN=GLUL PE=1 SV=4	GLUL	0.4277	6.4899e-07	Down	42.064	41.3	14	14	0.590132	0.608395	0.598866	1.40775	1.42742	1.36743	cytoplasm	K01915	glnA; glutamine synthetase [EC:6.3.1.2]	hsa04724 Glutamatergic synapse; hsa00630 Glyoxylate and dicarboxylate metabolism; hsa04727 GABAergic synapse; hsa00910 Nitrogen metabolism; hsa00250 Alanine, aspartate and glutamate metabolism; hsa00220 Arginine biosynthesis; hsa04217 Necroptosis; hsa01230 Biosynthesis of amino acids; hsa01100 Metabolic pathways	GO:0001504 neurotransmitter uptake; GO:0001505 regulation of neurotransmitter levels; GO:0002791 regulation of peptide secretion; GO:0002793 positive regulation of peptide secretion; GO:0006082 organic acid metabolic process; GO:0006520 cellular amino acid metabolic process; GO:0006536 glutamate metabolic process; GO:0006538 glutamate catabolic process; GO:0006541 glutamine metabolic process; GO:…	GO:0005622 intracellular; GO:0005623 cell; GO:0005737 cytoplasm; GO:0005739 mitochondrion; GO:0005783 endoplasmic reticulum; GO:0005791 rough endoplasmic reticulum; GO:0005829 cytosol; GO:0012505 endomembrane system; GO:0030424 axon; GO:0032991 protein-containing complex; GO:0036477 somatodendritic compartment; GO:0042995 cell projection; GO:0043005 neuron projection; GO:0043025 neuronal cell bod…	GO:0000166 nucleotide binding; GO:0000287 magnesium ion binding; GO:0003824 catalytic activity; GO:0004356 glutamate-ammonia ligase activity; GO:0005488 binding; GO:0005515 protein binding; GO:0005524 ATP binding; GO:0008144 drug binding; GO:0016211 ammonia ligase activity; GO:0016595 glutamate binding; GO:0016597 amino acid binding; GO:0016874 ligase activity; GO:0016879 ligase activity, forming…	PF03951; PF00120	Glutamine synthetase, beta-Grasp domain; Glutamine synthetase, catalytic domain	E	KOG0683	Glutamine synthetase
Q5VZ52	MORN repeat-containing protein 5 OS=Homo sapiens OX=9606 GN=MORN5 PE=1 SV=1	MORN5	0.4279	2.85918e-05	Down	18.731	40.4	5	5	0.620332	0.615289	0.562488	1.46669	1.34965	1.38555	cytoplasm									S	KOG0231	Junctional membrane complex protein Junctophilin and related MORN repeat proteins
Q8WVZ7	E3 ubiquitin-protein ligase RNF133 OS=Homo sapiens OX=9606 GN=RNF133 PE=2 SV=1	RNF133	0.4289	0.00106168	Down	42.293	13.8	4	4	0.679626	0.633726	0.487682	1.39567	1.39871	1.40458	extracellular	K15702			GO:0006464 cellular protein modification process; GO:0006807 nitrogen compound metabolic process; GO:0008152 metabolic process; GO:0009987 cellular process; GO:0016567 protein ubiquitination; GO:0019538 protein metabolic process; GO:0032446 protein modification by small protein conjugation; GO:0036211 protein modification process; GO:0043170 macromolecule metabolic process; GO:0043412 macromolecu…	GO:0005622 intracellular; GO:0005623 cell; GO:0005737 cytoplasm; GO:0005783 endoplasmic reticulum; GO:0005789 endoplasmic reticulum membrane; GO:0012505 endomembrane system; GO:0016020 membrane; GO:0031984 organelle subcompartment; GO:0042175 nuclear outer membrane-endoplasmic reticulum membrane network; GO:0043226 organelle; GO:0043227 membrane-bounded organelle; GO:0043229 intracellular organel…		PF13639	Ring finger domain	O	KOG4628	Predicted E3 ubiquitin ligase
P48735	Isocitrate dehydrogenase [NADP], mitochondrial OS=Homo sapiens OX=9606 GN=IDH2 PE=1 SV=2	IDH2	0.4309	1.33061e-05	Down	50.909	38.9	15	14	0.597642	0.63822	0.571003	1.40999	1.38947	1.39367	mitochondria	K00031	IDH1; isocitrate dehydrogenase [EC:1.1.1.42]	hsa00480 Glutathione metabolism; hsa04146 Peroxisome; hsa00020 Citrate cycle (TCA cycle); hsa01210 2-Oxocarboxylic acid metabolism; hsa01200 Carbon metabolism; hsa01230 Biosynthesis of amino acids; hsa01100 Metabolic pathways; hsa05230 Central carbon metabolism in cancer	GO:0002791 regulation of peptide secretion; GO:0002792 negative regulation of peptide secretion; GO:0005975 carbohydrate metabolic process; GO:0006082 organic acid metabolic process; GO:0006091 generation of precursor metabolites and energy; GO:0006099 tricarboxylic acid cycle; GO:0006101 citrate metabolic process; GO:0006102 isocitrate metabolic process; GO:0006103 2-oxoglutarate metabolic proce…	GO:0005622 intracellular; GO:0005623 cell; GO:0005737 cytoplasm; GO:0005739 mitochondrion; GO:0005740 mitochondrial envelope; GO:0005743 mitochondrial inner membrane; GO:0005759 mitochondrial matrix; GO:0005777 peroxisome; GO:0005829 cytosol; GO:0016020 membrane; GO:0019866 organelle inner membrane; GO:0031090 organelle membrane; GO:0031966 mitochondrial membrane; GO:0031967 organelle envelope; G…	GO:0000287 magnesium ion binding; GO:0003824 catalytic activity; GO:0004448 isocitrate dehydrogenase activity; GO:0004450 isocitrate dehydrogenase (NADP+) activity; GO:0005488 binding; GO:0016491 oxidoreductase activity; GO:0016614 oxidoreductase activity, acting on CH-OH group of donors; GO:0016616 oxidoreductase activity, acting on the CH-OH group of donors, NAD or NADP as acceptor; GO:0043167 …	PF00180	Isocitrate/isopropylmalate dehydrogenase	C	KOG1526	NADP-dependent isocitrate dehydrogenase
Q8TAQ9	SUN domain-containing protein 3 OS=Homo sapiens OX=9606 GN=SUN3 PE=1 SV=4	SUN3	0.4317	1.04535e-06	Down	40.503	27.2	7	7	0.612209	0.58392	0.613087	1.41385	1.39198	1.38495	mitochondria	K21874			GO:0006996 organelle organization; GO:0006997 nucleus organization; GO:0006998 nuclear envelope organization; GO:0007010 cytoskeleton organization; GO:0008104 protein localization; GO:0009987 cellular process; GO:0010256 endomembrane system organization; GO:0016043 cellular component organization; GO:0032507 maintenance of protein location in cell; GO:0033036 macromolecule localization; GO:003461…	GO:0005622 intracellular; GO:0005623 cell; GO:0005634 nucleus; GO:0005635 nuclear envelope; GO:0012505 endomembrane system; GO:0016020 membrane; GO:0031224 intrinsic component of membrane; GO:0031967 organelle envelope; GO:0031975 envelope; GO:0032991 protein-containing complex; GO:0034992 microtubule organizing center attachment site; GO:0034993 meiotic nuclear membrane microtubule tethering com…	GO:0005488 binding; GO:0005515 protein binding; GO:0043495 protein-membrane adaptor activity;			D	KOG2687	Spindle pole body protein, contains UNC-84 domain
Q76KD6	Speriolin OS=Homo sapiens OX=9606 GN=SPATC1 PE=2 SV=2	SPATC1	0.4319	8.60135e-06	Down	62.398	26.1	11	11	0.573661	0.625897	0.610266	1.38617	1.43314	1.37087	nucleus					GO:0005622 intracellular; GO:0005623 cell; GO:0005737 cytoplasm; GO:0005813 centrosome; GO:0005815 microtubule organizing center; GO:0005856 cytoskeleton; GO:0015630 microtubule cytoskeleton; GO:0043226 organelle; GO:0043228 non-membrane-bounded organelle; GO:0043229 intracellular organelle; GO:0043232 intracellular non-membrane-bounded organelle;	GO:0005488 binding; GO:0005515 protein binding; GO:0008092 cytoskeletal protein binding; GO:0015631 tubulin binding; GO:0043015 gamma-tubulin binding;
Q53FA7	Quinone oxidoreductase PIG3 OS=Homo sapiens OX=9606 GN=TP53I3 PE=1 SV=2	TP53I3	0.4327	1.35254e-05	Down	35.536	31	10	10	0.587311	0.623927	0.60081	1.32108	1.43993	1.42694	cytoplasm	K10133	TP53I3; tumor protein p53-inducible protein 3 [EC:1.-.-.-]	hsa04115 p53 signaling pathway	GO:0006139 nucleobase-containing compound metabolic process; GO:0006725 cellular aromatic compound metabolic process; GO:0006732 coenzyme metabolic process; GO:0006733 oxidoreduction coenzyme metabolic process; GO:0006739 NADP metabolic process; GO:0006753 nucleoside phosphate metabolic process; GO:0006793 phosphorus metabolic process; GO:0006796 phosphate-containing compound metabolic process; G…	GO:0005622 intracellular; GO:0005623 cell; GO:0005737 cytoplasm; GO:0005829 cytosol;	GO:0000166 nucleotide binding; GO:0003824 catalytic activity; GO:0003960 NADPH:quinone reductase activity; GO:0005488 binding; GO:0005515 protein binding; GO:0016491 oxidoreductase activity; GO:0016651 oxidoreductase activity, acting on NAD(P)H; GO:0016655 oxidoreductase activity, acting on NAD(P)H, quinone or similar compound as acceptor; GO:0036094 small molecule binding; GO:0042802 identical p…	PF08240	Alcohol dehydrogenase GroES-like domain	C	KOG1198	Zinc-binding oxidoreductase
P02795	Metallothionein-2 OS=Homo sapiens OX=9606 GN=MT2A PE=1 SV=1	MT2A	0.4328	0.00109927	Down	6.0422	65.6	3	1	0.52347	0.626069	0.66276	1.2081	1.49945	1.48015	extracellular	K14739	MT1_2; metallothionein 1/2	hsa04978 Mineral absorption				PF00131	Metallothionein
Q4G1C9	GLIPR1-like protein 2 OS=Homo sapiens OX=9606 GN=GLIPR1L2 PE=2 SV=2	GLIPR1L2	0.4342	6.95993e-07	Down	40.179	13.1	4	4	0.590903	0.621563	0.60407	1.40744	1.39097	1.38505	extracellular							PF00188	Cysteine-rich secretory protein family	S	KOG3017	Defense-related protein containing SCP domain
Q8IYP2	Serine protease 58 OS=Homo sapiens OX=9606 GN=PRSS58 PE=2 SV=1	PRSS58	0.4352	9.50023e-06	Down	27.084	36.9	7	7	0.579712	0.635496	0.604103	1.36332	1.39118	1.42619	extracellular	K22367						PF00089	Trypsin	O	KOG3627	Trypsin
P30048	Thioredoxin-dependent peroxide reductase, mitochondrial OS=Homo sapiens OX=9606 GN=PRDX3 PE=1 SV=3	PRDX3	0.4357	1.57304e-06	Down	27.692	38.3	6	6	0.598635	0.595548	0.626797	1.36675	1.4049	1.40737	mitochondria	K20011			GO:0000302 response to reactive oxygen species; GO:0002237 response to molecule of bacterial origin; GO:0002376 immune system process; GO:0002520 immune system development; GO:0006355 regulation of transcription, DNA-templated; GO:0006464 cellular protein modification process; GO:0006807 nitrogen compound metabolic process; GO:0006915 apoptotic process; GO:0006950 response to stress; GO:0006979 r…	GO:0005622 intracellular; GO:0005623 cell; GO:0005737 cytoplasm; GO:0005739 mitochondrion; GO:0005759 mitochondrial matrix; GO:0005768 endosome; GO:0005769 early endosome; GO:0005829 cytosol; GO:0012505 endomembrane system; GO:0031410 cytoplasmic vesicle; GO:0031974 membrane-enclosed lumen; GO:0031982 vesicle; GO:0032991 protein-containing complex; GO:0043226 organelle; GO:0043227 membrane-bounde…	GO:0003824 catalytic activity; GO:0004601 peroxidase activity; GO:0004857 enzyme inhibitor activity; GO:0004866 endopeptidase inhibitor activity; GO:0004869 cysteine-type endopeptidase inhibitor activity; GO:0005488 binding; GO:0005515 protein binding; GO:0008022 protein C-terminus binding; GO:0008379 thioredoxin peroxidase activity; GO:0008785 alkyl hydroperoxide reductase activity; GO:0016209 a…	PF00578; PF10417	AhpC/TSA family; C-terminal domain of 1-Cys peroxiredoxin	O	KOG0852	Alkyl hydroperoxide reductase, thiol specific antioxidant and related enzymes
Q495T6	Membrane metallo-endopeptidase-like 1 OS=Homo sapiens OX=9606 GN=MMEL1 PE=2 SV=2	MMEL1	0.436	1.04934e-05	Down	89.366	23.5	13	13	0.593976	0.626375	0.601423	1.45676	1.38835	1.33311	cytoplasm	K08635			GO:0006508 proteolysis; GO:0006807 nitrogen compound metabolic process; GO:0008152 metabolic process; GO:0019538 protein metabolic process; GO:0043170 macromolecule metabolic process; GO:0044238 primary metabolic process; GO:0071704 organic substance metabolic process; GO:1901564 organonitrogen compound metabolic process;	GO:0005576 extracellular region; GO:0005615 extracellular space; GO:0005622 intracellular; GO:0005623 cell; GO:0005737 cytoplasm; GO:0005783 endoplasmic reticulum; GO:0005794 Golgi apparatus; GO:0012505 endomembrane system; GO:0016020 membrane; GO:0043226 organelle; GO:0043227 membrane-bounded organelle; GO:0043229 intracellular organelle; GO:0043231 intracellular membrane-bounded organelle;	GO:0003824 catalytic activity; GO:0004175 endopeptidase activity; GO:0004222 metalloendopeptidase activity; GO:0005488 binding; GO:0008233 peptidase activity; GO:0008237 metallopeptidase activity; GO:0008270 zinc ion binding; GO:0016787 hydrolase activity; GO:0043167 ion binding; GO:0043169 cation binding; GO:0046872 metal ion binding; GO:0046914 transition metal ion binding; GO:0070011 peptidase…			E	KOG3624	M13 family peptidase
Q9BXI2	Mitochondrial ornithine transporter 2 OS=Homo sapiens OX=9606 GN=SLC25A2 PE=1 SV=3	SLC25A2	0.4363	9.56976e-06	Down	32.58	21.3	6	6	0.610318	0.627955	0.584467	1.33483	1.42037	1.42206	cytoplasm	K15101			GO:0000050 urea cycle; GO:0003333 amino acid transmembrane transport; GO:0006807 nitrogen compound metabolic process; GO:0006810 transport; GO:0006811 ion transport; GO:0006812 cation transport; GO:0006820 anion transport; GO:0006839 mitochondrial transport; GO:0006855 drug transmembrane transport; GO:0006865 amino acid transport; GO:0008152 metabolic process; GO:0009058 biosynthetic process; GO:…	GO:0005622 intracellular; GO:0005623 cell; GO:0005737 cytoplasm; GO:0005739 mitochondrion; GO:0005740 mitochondrial envelope; GO:0005743 mitochondrial inner membrane; GO:0016020 membrane; GO:0016021 integral component of membrane; GO:0019866 organelle inner membrane; GO:0031090 organelle membrane; GO:0031224 intrinsic component of membrane; GO:0031966 mitochondrial membrane; GO:0031967 organelle …	GO:0000064 L-ornithine transmembrane transporter activity; GO:0005215 transporter activity; GO:0005342 organic acid transmembrane transporter activity; GO:0008324 cation transmembrane transporter activity; GO:0008509 anion transmembrane transporter activity; GO:0008514 organic anion transmembrane transporter activity; GO:0015075 ion transmembrane transporter activity; GO:0015171 amino acid transm…			C	KOG0763	Mitochondrial ornithine transporter
Q8IYM1	Septin-12 OS=Homo sapiens OX=9606 GN=SEPTIN12 PE=1 SV=1	SEPTIN12	0.4364	9.53123e-06	Down	40.747	35.5	10	10	0.630764	0.617672	0.57434	1.37854	1.41487	1.38382	cytoplasm,nucleus	K16938	SEPT3_9_12; septin 3/9/12	hsa05100 Bacterial invasion of epithelial cells; hsa05131 Shigellosis		GO:0001725 stress fiber; GO:0005622 intracellular; GO:0005623 cell; GO:0005737 cytoplasm; GO:0005819 spindle; GO:0005856 cytoskeleton; GO:0005886 plasma membrane; GO:0005929 cilium; GO:0005938 cell cortex; GO:0015629 actin cytoskeleton; GO:0015630 microtubule cytoskeleton; GO:0016020 membrane; GO:0030496 midbody; GO:0031105 septin complex; GO:0031514 motile cilium; GO:0032153 cell division site; …	GO:0000166 nucleotide binding; GO:0001882 nucleoside binding; GO:0001883 purine nucleoside binding; GO:0005488 binding; GO:0005515 protein binding; GO:0005525 GTP binding; GO:0005543 phospholipid binding; GO:0008289 lipid binding; GO:0017076 purine nucleotide binding; GO:0019001 guanyl nucleotide binding; GO:0019003 GDP binding; GO:0032549 ribonucleoside binding; GO:0032550 purine ribonucleoside …	PF00735	Septin	DTZ	KOG1547	Septin CDC10 and related P-loop GTPases
Q9H3G5	Probable serine carboxypeptidase CPVL OS=Homo sapiens OX=9606 GN=CPVL PE=1 SV=2	CPVL	0.4368	5.07899e-07	Down	54.163	35.9	15	15	0.611184	0.610603	0.60236	1.41503	1.40532	1.3555	endoplasmic reticulum	K09645			GO:0006508 proteolysis; GO:0006807 nitrogen compound metabolic process; GO:0008152 metabolic process; GO:0009056 catabolic process; GO:0009057 macromolecule catabolic process; GO:0009987 cellular process; GO:0019538 protein metabolic process; GO:0030163 protein catabolic process; GO:0043170 macromolecule metabolic process; GO:0044237 cellular metabolic process; GO:0044238 primary metabolic proces…		GO:0003824 catalytic activity; GO:0004180 carboxypeptidase activity; GO:0004185 serine-type carboxypeptidase activity; GO:0008233 peptidase activity; GO:0008236 serine-type peptidase activity; GO:0008238 exopeptidase activity; GO:0016787 hydrolase activity; GO:0017171 serine hydrolase activity; GO:0070008 serine-type exopeptidase activity; GO:0070011 peptidase activity, acting on L-amino acid pep…	PF00450	Serine carboxypeptidase	O	KOG1282	Serine carboxypeptidases (lysosomal cathepsin A)
P13796	Plastin-2 OS=Homo sapiens OX=9606 GN=LCP1 PE=1 SV=6	LCP1	0.4369	3.07555e-07	Down	70.288	60.6	31	24	0.618944	0.602912	0.602516	1.36763	1.40259	1.4054	cytoplasm	K17276			GO:0001775 cell activation; GO:0002252 immune effector process; GO:0002263 cell activation involved in immune response; GO:0002285 lymphocyte activation involved in immune response; GO:0002286 T cell activation involved in immune response; GO:0002366 leukocyte activation involved in immune response; GO:0002376 immune system process; GO:0006928 movement of cell or subcellular component; GO:0006950…	GO:0001726 ruffle; GO:0001891 phagocytic cup; GO:0002102 podosome; GO:0005622 intracellular; GO:0005623 cell; GO:0005737 cytoplasm; GO:0005829 cytosol; GO:0005856 cytoskeleton; GO:0005884 actin filament; GO:0005886 plasma membrane; GO:0005912 adherens junction; GO:0005925 focal adhesion; GO:0015629 actin cytoskeleton; GO:0016020 membrane; GO:0030054 cell junction; GO:0030055 cell-substrate juncti…	GO:0003779 actin binding; GO:0005102 signaling receptor binding; GO:0005178 integrin binding; GO:0005488 binding; GO:0005509 calcium ion binding; GO:0005515 protein binding; GO:0008092 cytoskeletal protein binding; GO:0019899 enzyme binding; GO:0042802 identical protein binding; GO:0043167 ion binding; GO:0043169 cation binding; GO:0044877 protein-containing complex binding; GO:0046872 metal ion …	PF13499; PF00307	EF-hand domain pair; Calponin homology (CH) domain	Z	KOG0046	Ca2+-binding actin-bundling protein (fimbrin/plastin), EF-Hand protein superfamily
P12814	Alpha-actinin-1 OS=Homo sapiens OX=9606 GN=ACTN1 PE=1 SV=2	ACTN1	0.4376	2.38157e-07	Down	103.06	48.9	39	23	0.607629	0.600573	0.618115	1.36867	1.40217	1.40285	cytoplasm,nucleus	K05699	ACTN1_4; actinin alpha 1/4	hsa04510 Focal adhesion; hsa05146 Amoebiasis; hsa05203 Viral carcinogenesis; hsa04530 Tight junction; hsa05131 Shigellosis; hsa04810 Regulation of actin cytoskeleton; hsa05322 Systemic lupus erythematosus; hsa04520 Adherens junction; hsa04670 Leukocyte transendothelial migration	GO:0000902 cell morphogenesis; GO:0000904 cell morphogenesis involved in differentiation; GO:0002376 immune system process; GO:0002520 immune system development; GO:0002576 platelet degranulation; GO:0006810 transport; GO:0006887 exocytosis; GO:0006996 organelle organization; GO:0007010 cytoskeleton organization; GO:0007015 actin filament organization; GO:0007044 cell-substrate junction assembly;…	GO:0001725 stress fiber; GO:0001726 ruffle; GO:0005576 extracellular region; GO:0005622 intracellular; GO:0005623 cell; GO:0005634 nucleus; GO:0005737 cytoplasm; GO:0005829 cytosol; GO:0005856 cytoskeleton; GO:0005886 plasma membrane; GO:0005903 brush border; GO:0005911 cell-cell junction; GO:0005912 adherens junction; GO:0005915 zonula adherens; GO:0005916 fascia adherens; GO:0005923 bicellular …	GO:0003676 nucleic acid binding; GO:0003712 transcription coregulator activity; GO:0003713 transcription coactivator activity; GO:0003723 RNA binding; GO:0003725 double-stranded RNA binding; GO:0003779 actin binding; GO:0005102 signaling receptor binding; GO:0005178 integrin binding; GO:0005488 binding; GO:0005515 protein binding; GO:0008092 cytoskeletal protein binding; GO:0017166 vinculin bindi…	PF00307; PF00435; PF08726	Calponin homology (CH) domain; Spectrin repeat; Ca2+ insensitive EF hand	Z	KOG0035	Ca2+-binding actin-bundling protein (actinin), alpha chain (EF-Hand protein superfamily)
Q9H4Y5	Glutathione S-transferase omega-2 OS=Homo sapiens OX=9606 GN=GSTO2 PE=1 SV=1	GSTO2	0.4377	3.16405e-06	Down	28.254	40.7	10	10	0.592638	0.601664	0.632455	1.41769	1.38855	1.367	extracellular	K00799	GST; glutathione S-transferase [EC:2.5.1.18]	hsa00480 Glutathione metabolism; hsa05200 Pathways in cancer [Cancer network viewer]; hsa00982 Drug metabolism - cytochrome P450; hsa05418 Fluid shear stress and atherosclerosis; hsa05225 Hepatocellular carcinoma; hsa00983 Drug metabolism - other enzymes; hsa01524 Platinum drug resistance; hsa00980 Metabolism of xenobiotics by cytochrome P450; hsa05204 Chemical carcinogenesis; hsa01100 Metabolic …	GO:0005975 carbohydrate metabolic process; GO:0005996 monosaccharide metabolic process; GO:0006082 organic acid metabolic process; GO:0006518 peptide metabolic process; GO:0006575 cellular modified amino acid metabolic process; GO:0006732 coenzyme metabolic process; GO:0006749 glutathione metabolic process; GO:0006766 vitamin metabolic process; GO:0006767 water-soluble vitamin metabolic process; …	GO:0005622 intracellular; GO:0005623 cell; GO:0005737 cytoplasm; GO:0005829 cytosol;	GO:0003824 catalytic activity; GO:0004364 glutathione transferase activity; GO:0005488 binding; GO:0005515 protein binding; GO:0015036 disulfide oxidoreductase activity; GO:0015037 peptide disulfide oxidoreductase activity; GO:0015038 glutathione disulfide oxidoreductase activity; GO:0016209 antioxidant activity; GO:0016491 oxidoreductase activity; GO:0016667 oxidoreductase activity, acting on a …	PF13417; PF13410	Glutathione S-transferase, N-terminal domain; Glutathione S-transferase, C-terminal domain	O	KOG0406	Glutathione S-transferase
O75951	Lysozyme-like protein 6 OS=Homo sapiens OX=9606 GN=LYZL6 PE=1 SV=1	LYZL6	0.438	1.73157e-07	Down	16.956	31.1	3	3	0.610154	0.614256	0.602989	1.41678	1.37606	1.37976	extracellular	K01185			GO:0000003 reproduction; GO:0006950 response to stress; GO:0006952 defense response; GO:0007338 single fertilization; GO:0007342 fusion of sperm to egg plasma membrane involved in single fertilization; GO:0008152 metabolic process; GO:0009056 catabolic process; GO:0009566 fertilization; GO:0009605 response to external stimulus; GO:0009607 response to biotic stimulus; GO:0009617 response to bacter…	GO:0005576 extracellular region; GO:0005615 extracellular space; GO:0005623 cell; GO:0005886 plasma membrane; GO:0005929 cilium; GO:0016020 membrane; GO:0031514 motile cilium; GO:0036126 sperm flagellum; GO:0042995 cell projection; GO:0043226 organelle; GO:0071944 cell periphery; GO:0097225 sperm midpiece; GO:0097524 sperm plasma membrane; GO:0097729 9+2 motile cilium; GO:0120025 plasma membrane …	GO:0003796 lysozyme activity; GO:0003824 catalytic activity; GO:0004553 hydrolase activity, hydrolyzing O-glycosyl compounds; GO:0016787 hydrolase activity; GO:0016798 hydrolase activity, acting on glycosyl bonds; GO:0061783 peptidoglycan muralytic activity;	PF00062	C-type lysozyme/alpha-lactalbumin family
Q8IXA5	Sperm acrosome membrane-associated protein 3 OS=Homo sapiens OX=9606 GN=SPACA3 PE=1 SV=1	SPACA3	0.4381	5.0414e-07	Down	23.431	33.5	7	7	0.596017	0.607169	0.62471	1.39013	1.38311	1.39886	extracellular				GO:0000003 reproduction; GO:0000270 peptidoglycan metabolic process; GO:0001775 cell activation; GO:0002274 myeloid leukocyte activation; GO:0002376 immune system process; GO:0002682 regulation of immune system process; GO:0002684 positive regulation of immune system process; GO:0002694 regulation of leukocyte activation; GO:0002696 positive regulation of leukocyte activation; GO:0006022 aminogly…	GO:0001669 acrosomal vesicle; GO:0002080 acrosomal membrane; GO:0005576 extracellular region; GO:0005615 extracellular space; GO:0005622 intracellular; GO:0005623 cell; GO:0005737 cytoplasm; GO:0005773 vacuole; GO:0012505 endomembrane system; GO:0012506 vesicle membrane; GO:0016020 membrane; GO:0030141 secretory granule; GO:0030659 cytoplasmic vesicle membrane; GO:0030667 secretory granule membra…	GO:0003796 lysozyme activity; GO:0003824 catalytic activity; GO:0004553 hydrolase activity, hydrolyzing O-glycosyl compounds; GO:0016787 hydrolase activity; GO:0016798 hydrolase activity, acting on glycosyl bonds; GO:0061783 peptidoglycan muralytic activity;	PF00062	C-type lysozyme/alpha-lactalbumin family
Q16134	Electron transfer flavoprotein-ubiquinone oxidoreductase, mitochondrial OS=Homo sapiens OX=9606 GN=ETFDH PE=1 SV=2	ETFDH	0.4385	8.815e-06	Down	68.495	39.2	16	16	0.625881	0.623331	0.579666	1.35528	1.39129	1.42455	mitochondria	K00311			GO:0006082 organic acid metabolic process; GO:0006091 generation of precursor metabolites and energy; GO:0006629 lipid metabolic process; GO:0006631 fatty acid metabolic process; GO:0006635 fatty acid beta-oxidation; GO:0006950 response to stress; GO:0006979 response to oxidative stress; GO:0008152 metabolic process; GO:0009056 catabolic process; GO:0009062 fatty acid catabolic process; GO:000998…	GO:0005622 intracellular; GO:0005623 cell; GO:0005737 cytoplasm; GO:0005739 mitochondrion; GO:0005740 mitochondrial envelope; GO:0005743 mitochondrial inner membrane; GO:0005759 mitochondrial matrix; GO:0016020 membrane; GO:0016021 integral component of membrane; GO:0017133 mitochondrial electron transfer flavoprotein complex; GO:0019866 organelle inner membrane; GO:0031090 organelle membrane; GO…	GO:0000166 nucleotide binding; GO:0003824 catalytic activity; GO:0004174 electron-transferring-flavoprotein dehydrogenase activity; GO:0005488 binding; GO:0009055 electron transfer activity; GO:0016491 oxidoreductase activity; GO:0016645 oxidoreductase activity, acting on the CH-NH group of donors; GO:0016649 oxidoreductase activity, acting on the CH-NH group of donors, quinone or similar compoun…			C	KOG2415	Electron transfer flavoprotein ubiquinone oxidoreductase
Q8NHP8	Putative phospholipase B-like 2 OS=Homo sapiens OX=9606 GN=PLBD2 PE=1 SV=2	PLBD2	0.4386	2.04875e-06	Down	65.471	22.1	10	10	0.601004	0.596005	0.632285	1.36934	1.39969	1.40167	extracellular					GO:0000323 lytic vacuole; GO:0005622 intracellular; GO:0005623 cell; GO:0005737 cytoplasm; GO:0005764 lysosome; GO:0005773 vacuole; GO:0043226 organelle; GO:0043227 membrane-bounded organelle; GO:0043229 intracellular organelle; GO:0043231 intracellular membrane-bounded organelle;				I	KOG3774	Uncharacterized conserved protein Lama
Q8IWZ5	Tripartite motif-containing protein 42 OS=Homo sapiens OX=9606 GN=TRIM42 PE=1 SV=2	TRIM42	0.4387	4.4417e-07	Down	82.744	32.6	16	16	0.612796	0.595517	0.621381	1.3936	1.37594	1.40077	nucleus	K12018						PF00643; PF00041	B-box zinc finger; Fibronectin type III domain	O	KOG2177	Predicted E3 ubiquitin ligase
Q9H845	Complex I assembly factor ACAD9, mitochondrial OS=Homo sapiens OX=9606 GN=ACAD9 PE=1 SV=1	ACAD9	0.439	1.23997e-06	Down	68.76	36.2	18	18	0.606086	0.595069	0.629352	1.37306	1.39941	1.39703	mitochondria	K15980			GO:0001676 long-chain fatty acid metabolic process; GO:0006082 organic acid metabolic process; GO:0006629 lipid metabolic process; GO:0006631 fatty acid metabolic process; GO:0006996 organelle organization; GO:0007005 mitochondrion organization; GO:0008152 metabolic process; GO:0009987 cellular process; GO:0010257 NADH dehydrogenase complex assembly; GO:0016043 cellular component organization; GO…	GO:0005622 intracellular; GO:0005623 cell; GO:0005634 nucleus; GO:0005737 cytoplasm; GO:0005739 mitochondrion; GO:0005740 mitochondrial envelope; GO:0005743 mitochondrial inner membrane; GO:0016020 membrane; GO:0019866 organelle inner membrane; GO:0030425 dendrite; GO:0031090 organelle membrane; GO:0031966 mitochondrial membrane; GO:0031967 organelle envelope; GO:0031975 envelope; GO:0036477 soma…	GO:0003824 catalytic activity; GO:0003995 acyl-CoA dehydrogenase activity; GO:0004466 long-chain-acyl-CoA dehydrogenase activity; GO:0016491 oxidoreductase activity; GO:0016627 oxidoreductase activity, acting on the CH-CH group of donors; GO:0070991 medium-chain-acyl-CoA dehydrogenase activity;	PF02771; PF02770; PF00441	Acyl-CoA dehydrogenase, N-terminal domain; Acyl-CoA dehydrogenase, middle domain; Acyl-CoA dehydrogenase, C-terminal domain	C	KOG0137	Very-long-chain acyl-CoA dehydrogenase
O96015	Dynein light chain 4, axonemal OS=Homo sapiens OX=9606 GN=DNAL4 PE=1 SV=1	DNAL4	0.4399	2.72615e-06	Down	12.009	38.1	4	4	0.629371	0.607729	0.59608	1.42044	1.35265	1.39373	extracellular	K10412	DNAL4; dynein light chain 4, axonemal	hsa05016 Huntington disease; hsa05022 Pathways of neurodegeneration - multiple diseases; hsa05014 Amyotrophic lateral sclerosis	GO:0006928 movement of cell or subcellular component; GO:0007017 microtubule-based process; GO:0007018 microtubule-based movement; GO:0009987 cellular process; GO:0032781 positive regulation of ATPase activity; GO:0043085 positive regulation of catalytic activity; GO:0043462 regulation of ATPase activity; GO:0044093 positive regulation of molecular function; GO:0050790 regulation of catalytic act…	GO:0005622 intracellular; GO:0005623 cell; GO:0005856 cytoskeleton; GO:0005875 microtubule associated complex; GO:0005886 plasma membrane; GO:0015630 microtubule cytoskeleton; GO:0016020 membrane; GO:0030286 dynein complex; GO:0032991 protein-containing complex; GO:0043226 organelle; GO:0043228 non-membrane-bounded organelle; GO:0043229 intracellular organelle; GO:0043232 intracellular non-membra…	GO:0003774 motor activity; GO:0003777 microtubule motor activity; GO:0003824 catalytic activity; GO:0005488 binding; GO:0005515 protein binding; GO:0008092 cytoskeletal protein binding; GO:0016462 pyrophosphatase activity; GO:0016787 hydrolase activity; GO:0016817 hydrolase activity, acting on acid anhydrides; GO:0016818 hydrolase activity, acting on acid anhydrides, in phosphorus-containing anhy…	PF01221	Dynein light chain type 1	Z	KOG3430	Dynein light chain type 1
Q16595	Frataxin, mitochondrial OS=Homo sapiens OX=9606 GN=FXN PE=1 SV=2	FXN	0.4424	0.00464354	Down	23.135	29.5	4	4	0.462978	0.765498	0.611903	1.3528	1.42925	1.37757	mitochondria	K19054	FXN; frataxin [EC:1.16.3.1]	hsa00860 Porphyrin and chlorophyll metabolism	GO:0000302 response to reactive oxygen species; GO:0001558 regulation of cell growth; GO:0003008 system process; GO:0006091 generation of precursor metabolites and energy; GO:0006119 oxidative phosphorylation; GO:0006139 nucleobase-containing compound metabolic process; GO:0006163 purine nucleotide metabolic process; GO:0006464 cellular protein modification process; GO:0006508 proteolysis; GO:000…	GO:0005622 intracellular; GO:0005623 cell; GO:0005737 cytoplasm; GO:0005739 mitochondrion; GO:0005759 mitochondrial matrix; GO:0005829 cytosol; GO:0031974 membrane-enclosed lumen; GO:0032991 protein-containing complex; GO:0043226 organelle; GO:0043227 membrane-bounded organelle; GO:0043229 intracellular organelle; GO:0043231 intracellular membrane-bounded organelle; GO:0043233 organelle lumen; GO…	GO:0003824 catalytic activity; GO:0004322 ferroxidase activity; GO:0005488 binding; GO:0005506 iron ion binding; GO:0005515 protein binding; GO:0008198 ferrous iron binding; GO:0008199 ferric iron binding; GO:0016491 oxidoreductase activity; GO:0016530 metallochaperone activity; GO:0016722 oxidoreductase activity, oxidizing metal ions; GO:0016724 oxidoreductase activity, oxidizing metal ions, oxy…	PF01491	Frataxin-like domain	C	KOG3413	Mitochondrial matrix protein frataxin, involved in Fe/S protein biosynthesis
Q8NCR6	Spermatid-specific manchette-related protein 1 OS=Homo sapiens OX=9606 GN=SMRP1 PE=1 SV=2	SMRP1	0.4431	1.01089e-05	Down	30.166	76.3	18	18	0.633389	0.59441	0.614406	1.34083	1.44797	1.369	cytoplasm,nucleus	K18634			GO:0009987 cellular process; GO:0016043 cellular component organization; GO:0022607 cellular component assembly; GO:0034622 cellular protein-containing complex assembly; GO:0043933 protein-containing complex subunit organization; GO:0044085 cellular component biogenesis; GO:0065003 protein-containing complex assembly; GO:0071840 cellular component organization or biogenesis;	GO:0002177 manchette; GO:0005622 intracellular; GO:0005623 cell; GO:0005634 nucleus; GO:0005737 cytoplasm; GO:0005856 cytoskeleton; GO:0015630 microtubule cytoskeleton; GO:0043226 organelle; GO:0043227 membrane-bounded organelle; GO:0043228 non-membrane-bounded organelle; GO:0043229 intracellular organelle; GO:0043231 intracellular membrane-bounded organelle; GO:0043232 intracellular non-membrane…	GO:0005488 binding; GO:0005515 protein binding; GO:0008092 cytoskeletal protein binding; GO:0015631 tubulin binding; GO:0043014 alpha-tubulin binding;
Q6ZMR3	L-lactate dehydrogenase A-like 6A OS=Homo sapiens OX=9606 GN=LDHAL6A PE=2 SV=1	LDHAL6A	0.4433	7.5845e-05	Down	36.507	20.8	5	4	0.565133	0.651945	0.625805	1.33534	1.37219	1.44959	plasma membrane	K00016	LDH; L-lactate dehydrogenase [EC:1.1.1.27]	hsa00270 Cysteine and methionine metabolism; hsa04066 HIF-1 signaling pathway; hsa04922 Glucagon signaling pathway; hsa00620 Pyruvate metabolism; hsa00010 Glycolysis / Gluconeogenesis; hsa00640 Propanoate metabolism; hsa01100 Metabolic pathways; hsa05230 Central carbon metabolism in cancer				PF02866	lactate/malate dehydrogenase, alpha/beta C-terminal domain	C	KOG1495	Lactate dehydrogenase
P00918	Carbonic anhydrase 2 OS=Homo sapiens OX=9606 GN=CA2 PE=1 SV=2	CA2	0.4439	3.85583e-09	Down	29.246	68.1	16	16	0.616457	0.615655	0.612454	1.38201	1.39485	1.37857	cytoplasm	K18245	CA2; carbonic anhydrase 2 [EC:4.2.1.1]	hsa04972 Pancreatic secretion; hsa04964 Proximal tubule bicarbonate reclamation; hsa04976 Bile secretion; hsa00910 Nitrogen metabolism; hsa04966 Collecting duct acid secretion; hsa04971 Gastric acid secretion; hsa01100 Metabolic pathways	GO:0001655 urogenital system development; GO:0001822 kidney development; GO:0002009 morphogenesis of an epithelium; GO:0002376 immune system process; GO:0002520 immune system development; GO:0002521 leukocyte differentiation; GO:0002573 myeloid leukocyte differentiation; GO:0002682 regulation of immune system process; GO:0002684 positive regulation of immune system process; GO:0002761 regulation …	GO:0005576 extracellular region; GO:0005615 extracellular space; GO:0005622 intracellular; GO:0005623 cell; GO:0005737 cytoplasm; GO:0005829 cytosol; GO:0005886 plasma membrane; GO:0005902 microvillus; GO:0016020 membrane; GO:0016323 basolateral plasma membrane; GO:0030424 axon; GO:0042995 cell projection; GO:0043005 neuron projection; GO:0043209 myelin sheath; GO:0045177 apical part of cell; GO:…	GO:0003824 catalytic activity; GO:0004064 arylesterase activity; GO:0004089 carbonate dehydratase activity; GO:0005488 binding; GO:0008270 zinc ion binding; GO:0016787 hydrolase activity; GO:0016788 hydrolase activity, acting on ester bonds; GO:0016829 lyase activity; GO:0016835 carbon-oxygen lyase activity; GO:0016836 hydro-lyase activity; GO:0043167 ion binding; GO:0043169 cation binding; GO:00…	PF00194	Eukaryotic-type carbonic anhydrase	P	KOG0382	Carbonic anhydrase
P04899	Guanine nucleotide-binding protein G(i) subunit alpha-2 OS=Homo sapiens OX=9606 GN=GNAI2 PE=1 SV=3	GNAI2	0.4442	4.71505e-08	Down	40.45	47.9	13	8	0.607761	0.621275	0.61653	1.37356	1.38919	1.39169	cytoplasm	K04630	GNAI; guanine nucleotide-binding protein G(i) subunit alpha	hsa04923 Regulation of lipolysis in adipocytes; hsa05200 Pathways in cancer [Cancer network viewer]; hsa04360 Axon guidance; hsa04935 Growth hormone synthesis, secretion and action; hsa04371 Apelin signaling pathway; hsa04261 Adrenergic signaling in cardiomyocytes; hsa05012 Parkinson disease; hsa04914 Progesterone-mediated oocyte maturation; hsa04071 Sphingolipid signaling pathway; hsa04934 Cushi…	GO:0001973 G protein-coupled adenosine receptor signaling pathway; GO:0006457 protein folding; GO:0007154 cell communication; GO:0007165 signal transduction; GO:0007166 cell surface receptor signaling pathway; GO:0007186 G protein-coupled receptor signaling pathway; GO:0007187 G protein-coupled receptor signaling pathway, coupled to cyclic nucleotide second messenger; GO:0007188 adenylate cyclase…	GO:0005622 intracellular; GO:0005623 cell; GO:0005634 nucleus; GO:0005654 nucleoplasm; GO:0005737 cytoplasm; GO:0005813 centrosome; GO:0005815 microtubule organizing center; GO:0005829 cytosol; GO:0005834 heterotrimeric G-protein complex; GO:0005856 cytoskeleton; GO:0005886 plasma membrane; GO:0009898 cytoplasmic side of plasma membrane; GO:0012505 endomembrane system; GO:0015630 microtubule cyto…	GO:0000166 nucleotide binding; GO:0001664 G protein-coupled receptor binding; GO:0001882 nucleoside binding; GO:0001883 purine nucleoside binding; GO:0003824 catalytic activity; GO:0003924 GTPase activity; GO:0005102 signaling receptor binding; GO:0005488 binding; GO:0005515 protein binding; GO:0005525 GTP binding; GO:0016462 pyrophosphatase activity; GO:0016787 hydrolase activity; GO:0016817 hyd…	PF00503	G-protein alpha subunit	DT	KOG0082	G-protein alpha subunit (small G protein superfamily)
Q96EY1	DnaJ homolog subfamily A member 3, mitochondrial OS=Homo sapiens OX=9606 GN=DNAJA3 PE=1 SV=2	DNAJA3	0.4448	1.86452e-05	Down	52.488	26.2	8	8	0.623621	0.629764	0.593819	1.45985	1.37011	1.32283	mitochondria	K09504	DNAJA3; DnaJ homolog subfamily A member 3	hsa05203 Viral carcinogenesis	GO:0000002 mitochondrial genome maintenance; GO:0000122 negative regulation of transcription by RNA polymerase II; GO:0001775 cell activation; GO:0001776 leukocyte homeostasis; GO:0001932 regulation of protein phosphorylation; GO:0001933 negative regulation of protein phosphorylation; GO:0001941 postsynaptic membrane organization; GO:0001959 regulation of cytokine-mediated signaling pathway; GO:0…	GO:0005622 intracellular; GO:0005623 cell; GO:0005634 nucleus; GO:0005737 cytoplasm; GO:0005739 mitochondrion; GO:0005759 mitochondrial matrix; GO:0005829 cytosol; GO:0005886 plasma membrane; GO:0009295 nucleoid; GO:0016020 membrane; GO:0019897 extrinsic component of plasma membrane; GO:0019898 extrinsic component of membrane; GO:0031594 neuromuscular junction; GO:0031974 membrane-enclosed lumen;…	GO:0005102 signaling receptor binding; GO:0005126 cytokine receptor binding; GO:0005133 interferon-gamma receptor binding; GO:0005488 binding; GO:0005515 protein binding; GO:0008134 transcription factor binding; GO:0019899 enzyme binding; GO:0019900 kinase binding; GO:0019901 protein kinase binding; GO:0030234 enzyme regulator activity; GO:0030544 Hsp70 protein binding; GO:0030695 GTPase regulato…	PF00226; PF01556; PF00684	DnaJ domain; DnaJ C terminal domain; DnaJ central domain	K	KOG0715	Molecular chaperone (DnaJ superfamily)
A4D1F6	Leucine-rich repeat and death domain-containing protein 1 OS=Homo sapiens OX=9606 GN=LRRD1 PE=2 SV=2	LRRD1	0.4455	1.46529e-06	Down	98.034	14.1	9	9	0.602789	0.637308	0.609148	1.36864	1.38714	1.39497	cytoplasm				GO:0007154 cell communication; GO:0007163 establishment or maintenance of cell polarity; GO:0007165 signal transduction; GO:0009987 cellular process; GO:0023052 signaling; GO:0030011 maintenance of cell polarity; GO:0035088 establishment or maintenance of apical/basal cell polarity; GO:0035090 maintenance of apical/basal cell polarity; GO:0045197 establishment or maintenance of epithelial cell ap…	GO:0005622 intracellular; GO:0005623 cell; GO:0005737 cytoplasm; GO:0005886 plasma membrane; GO:0016020 membrane; GO:0016323 basolateral plasma membrane; GO:0071944 cell periphery; GO:0098590 plasma membrane region;				S	KOG0619	FOG: Leucine rich repeat
Q8N1V2	Cilia- and flagella-associated protein 52 OS=Homo sapiens OX=9606 GN=CFAP52 PE=1 SV=3	CFAP52	0.4456	8.00746e-07	Down	68.297	63.1	28	28	0.630539	0.604788	0.614151	1.37853	1.40848	1.36352	nucleus									S	KOG0266	WD40 repeat-containing protein
Q9H299	SH3 domain-binding glutamic acid-rich-like protein 3 OS=Homo sapiens OX=9606 GN=SH3BGRL3 PE=1 SV=1	SH3BGRL3	0.4468	0.00158358	Down	10.438	31.2	3	3	0.651892	0.64478	0.556315	1.20868	1.63752	1.30081	mitochondria	K23740				GO:0005622 intracellular; GO:0005623 cell; GO:0005737 cytoplasm;				S	KOG4023	Uncharacterized conserved protein
Q502X0	MORN repeat-containing protein 2 OS=Homo sapiens OX=9606 GN=MORN2 PE=1 SV=2	MORN2	0.4478	1.98255e-05	Down	8.9387	29.1	2	2	0.58739	0.639391	0.629048	1.32132	1.39983	1.42302	extracellular
Q8NA54	IQ and ubiquitin-like domain-containing protein OS=Homo sapiens OX=9606 GN=IQUB PE=1 SV=2	IQUB	0.4478	2.35023e-05	Down	92.58	28.7	18	18	0.644921	0.617796	0.593128	1.37636	1.44723	1.32056	cytoplasm,nucleus				GO:0006996 organelle organization; GO:0007154 cell communication; GO:0007165 signal transduction; GO:0007166 cell surface receptor signaling pathway; GO:0007224 smoothened signaling pathway; GO:0009987 cellular process; GO:0016043 cellular component organization; GO:0022607 cellular component assembly; GO:0023052 signaling; GO:0030030 cell projection organization; GO:0030031 cell projection assem…	GO:0001669 acrosomal vesicle; GO:0005622 intracellular; GO:0005623 cell; GO:0005737 cytoplasm; GO:0005929 cilium; GO:0012505 endomembrane system; GO:0030141 secretory granule; GO:0031410 cytoplasmic vesicle; GO:0031514 motile cilium; GO:0031982 vesicle; GO:0042995 cell projection; GO:0043226 organelle; GO:0043227 membrane-bounded organelle; GO:0043229 intracellular organelle; GO:0097708 intracell…		PF00240	Ubiquitin family
Q5THR3	EF-hand calcium-binding domain-containing protein 6 OS=Homo sapiens OX=9606 GN=EFCAB6 PE=1 SV=1	EFCAB6	0.4496	1.24942e-07	Down	172.93	37.8	47	47	0.611424	0.626317	0.623166	1.36363	1.38262	1.39284	mitochondria	K23851				GO:0005622 intracellular; GO:0005623 cell; GO:0005634 nucleus; GO:0005654 nucleoplasm; GO:0031974 membrane-enclosed lumen; GO:0031981 nuclear lumen; GO:0043226 organelle; GO:0043227 membrane-bounded organelle; GO:0043229 intracellular organelle; GO:0043231 intracellular membrane-bounded organelle; GO:0043233 organelle lumen; GO:0070013 intracellular organelle lumen;	GO:0005488 binding; GO:0005509 calcium ion binding; GO:0043167 ion binding; GO:0043169 cation binding; GO:0046872 metal ion binding;	PF08976; PF13833; PF13499	Domain of unknown function (DUF1880); EF-hand domain pair; EF-hand domain pair	K	KOG0027	Calmodulin and related proteins (EF-Hand superfamily)
Q96N23	Cilia- and flagella-associated protein 54 OS=Homo sapiens OX=9606 GN=CFAP54 PE=2 SV=3	CFAP54	0.4502	1.15311e-05	Down	351.97	16.6	43	43	0.604673	0.656847	0.601034	1.36495	1.37072	1.40177	plasma membrane				GO:0000003 reproduction; GO:0001539 cilium or flagellum-dependent cell motility; GO:0003341 cilium movement; GO:0006928 movement of cell or subcellular component; GO:0006996 organelle organization; GO:0007017 microtubule-based process; GO:0007018 microtubule-based movement; GO:0007276 gamete generation; GO:0007283 spermatogenesis; GO:0009987 cellular process; GO:0016043 cellular component organiz…	GO:0005622 intracellular; GO:0005623 cell; GO:0005737 cytoplasm; GO:0005856 cytoskeleton; GO:0005929 cilium; GO:0005930 axoneme; GO:0032838 plasma membrane bounded cell projection cytoplasm; GO:0042995 cell projection; GO:0043226 organelle; GO:0043228 non-membrane-bounded organelle; GO:0043229 intracellular organelle; GO:0043232 intracellular non-membrane-bounded organelle; GO:0097014 ciliary pla…
Q5JX71	Protein FAM209A OS=Homo sapiens OX=9606 GN=FAM209A PE=1 SV=1	FAM209A	0.4508	9.9825e-06	Down	19.603	42.7	7	5	0.65585	0.595438	0.613158	1.37254	1.38375	1.37926	extracellular
Q9BX68	Histidine triad nucleotide-binding protein 2, mitochondrial OS=Homo sapiens OX=9606 GN=HINT2 PE=1 SV=1	HINT2	0.4508	1.47629e-07	Down	17.162	57.7	6	6	0.627433	0.611632	0.62537	1.36475	1.39315	1.37767	mitochondria				GO:0006629 lipid metabolic process; GO:0008152 metabolic process; GO:0009056 catabolic process; GO:0009892 negative regulation of metabolic process; GO:0010605 negative regulation of macromolecule metabolic process; GO:0016042 lipid catabolic process; GO:0019222 regulation of metabolic process; GO:0031323 regulation of cellular metabolic process; GO:0031324 negative regulation of cellular metabol…	GO:0005622 intracellular; GO:0005623 cell; GO:0005634 nucleus; GO:0005730 nucleolus; GO:0005737 cytoplasm; GO:0005739 mitochondrion; GO:0031974 membrane-enclosed lumen; GO:0031981 nuclear lumen; GO:0043226 organelle; GO:0043227 membrane-bounded organelle; GO:0043228 non-membrane-bounded organelle; GO:0043229 intracellular organelle; GO:0043231 intracellular membrane-bounded organelle; GO:0043232 …		PF01230	HIT domain	T	KOG3275	Zinc-binding protein of the histidine triad (HIT) family
P06744	Glucose-6-phosphate isomerase OS=Homo sapiens OX=9606 GN=GPI PE=1 SV=4	GPI	0.4521	3.80648e-09	Down	63.146	41.8	19	13	0.627317	0.621711	0.618908	1.37724	1.37833	1.37649	cytoplasm	K01810	GPI; glucose-6-phosphate isomerase [EC:5.3.1.9]	hsa00500 Starch and sucrose metabolism; hsa00010 Glycolysis / Gluconeogenesis; hsa01200 Carbon metabolism; hsa00030 Pentose phosphate pathway; hsa00520 Amino sugar and nucleotide sugar metabolism; hsa01100 Metabolic pathways	GO:0001701 in utero embryonic development; GO:0001704 formation of primary germ layer; GO:0001707 mesoderm formation; GO:0001775 cell activation; GO:0002252 immune effector process; GO:0002262 myeloid cell homeostasis; GO:0002263 cell activation involved in immune response; GO:0002274 myeloid leukocyte activation; GO:0002275 myeloid cell activation involved in immune response; GO:0002283 neutroph…	GO:0005576 extracellular region; GO:0005622 intracellular; GO:0005623 cell; GO:0005634 nucleus; GO:0005654 nucleoplasm; GO:0005737 cytoplasm; GO:0005829 cytosol; GO:0005886 plasma membrane; GO:0005929 cilium; GO:0012505 endomembrane system; GO:0016020 membrane; GO:0030141 secretory granule; GO:0031090 organelle membrane; GO:0031253 cell projection membrane; GO:0031410 cytoplasmic vesicle; GO:0031…	GO:0003824 catalytic activity; GO:0004347 glucose-6-phosphate isomerase activity; GO:0005488 binding; GO:0005515 protein binding; GO:0016853 isomerase activity; GO:0016860 intramolecular oxidoreductase activity; GO:0016861 intramolecular oxidoreductase activity, interconverting aldoses and ketoses; GO:0016866 intramolecular transferase activity; GO:0019899 enzyme binding; GO:0030246 carbohydrate …	PF00342	Phosphoglucose isomerase	F	KOG2446	Glucose-6-phosphate isomerase
Q9H3K2	Growth hormone-inducible transmembrane protein OS=Homo sapiens OX=9606 GN=GHITM PE=1 SV=2	GHITM	0.4522	1.30374e-05	Down	37.205	21.4	6	6	0.646223	0.6155	0.606677	1.32693	1.43935	1.36532	plasma membrane	K21890				GO:0005622 intracellular; GO:0005623 cell; GO:0005737 cytoplasm; GO:0005739 mitochondrion; GO:0043226 organelle; GO:0043227 membrane-bounded organelle; GO:0043229 intracellular organelle; GO:0043231 intracellular membrane-bounded organelle;				T	KOG1630	Growth hormone-induced protein and related proteins
Q86SX6	Glutaredoxin-related protein 5, mitochondrial OS=Homo sapiens OX=9606 GN=GLRX5 PE=1 SV=2	GLRX5	0.4527	8.73925e-05	Down	16.628	21	2	2	0.652217	0.646739	0.570759	1.31428	1.39085	1.42515	cytoplasm	K07390			GO:0002376 immune system process; GO:0002520 immune system development; GO:0006464 cellular protein modification process; GO:0006807 nitrogen compound metabolic process; GO:0007275 multicellular organism development; GO:0008152 metabolic process; GO:0009249 protein lipoylation; GO:0009987 cellular process; GO:0010467 gene expression; GO:0018065 protein-cofactor linkage; GO:0018193 peptidyl-amino …	GO:0005622 intracellular; GO:0005623 cell; GO:0005737 cytoplasm; GO:0005739 mitochondrion; GO:0005759 mitochondrial matrix; GO:0031974 membrane-enclosed lumen; GO:0043226 organelle; GO:0043227 membrane-bounded organelle; GO:0043229 intracellular organelle; GO:0043231 intracellular membrane-bounded organelle; GO:0043233 organelle lumen; GO:0070013 intracellular organelle lumen;		PF00462	Glutaredoxin	O	KOG0911	Glutaredoxin-related protein
Q6ZU64	Cilia- and flagella-associated protein 65 OS=Homo sapiens OX=9606 GN=CFAP65 PE=1 SV=2	CFAP65	0.454	1.94537e-05	Down	217.25	23	35	35	0.586171	0.653502	0.633789	1.3642	1.40085	1.36149	cytoplasm	K24226
Q9P0V9	Septin-10 OS=Homo sapiens OX=9606 GN=SEPTIN10 PE=1 SV=2	SEPTIN10	0.4541	9.72865e-06	Down	52.592	43.8	14	13	0.615071	0.626417	0.63233	1.32301	1.35511	1.44805	cytoplasm,nucleus	K16940						PF00735	Septin	Z	KOG3859	Septins (P-loop GTPases)
Q9P1W3	Calcium permeable stress-gated cation channel 1 OS=Homo sapiens OX=9606 GN=TMEM63C PE=2 SV=1	TMEM63C	0.4542	0.0025496	Down	93.316	5	3	3		0.619522	0.542586	1.30834	1.37617	1.15339	plasma membrane	K21989			GO:0006810 transport; GO:0006811 ion transport; GO:0006812 cation transport; GO:0034220 ion transmembrane transport; GO:0051179 localization; GO:0051234 establishment of localization; GO:0055085 transmembrane transport; GO:0098655 cation transmembrane transport;		GO:0005215 transporter activity; GO:0005216 ion channel activity; GO:0005227 calcium activated cation channel activity; GO:0005261 cation channel activity; GO:0008324 cation transmembrane transporter activity; GO:0015075 ion transmembrane transporter activity; GO:0015267 channel activity; GO:0015318 inorganic molecular entity transmembrane transporter activity; GO:0022803 passive transmembrane tr…			P	KOG1134	Uncharacterized conserved protein
P06702	Protein S100-A9 OS=Homo sapiens OX=9606 GN=S100A9 PE=1 SV=1	S100A9	0.4551	1.41935e-05	Down	13.242	70.2	7	7	0.631997	0.63436	0.610089	1.45209	1.3476	1.32386	cytoplasm	K21128	S100A9; protein S100-A9	hsa04657 IL-17 signaling pathway	GO:0001558 regulation of cell growth; GO:0001775 cell activation; GO:0001816 cytokine production; GO:0002218 activation of innate immune response; GO:0002221 pattern recognition receptor signaling pathway; GO:0002224 toll-like receptor signaling pathway; GO:0002237 response to molecule of bacterial origin; GO:0002252 immune effector process; GO:0002253 activation of immune response; GO:0002263 ce…	GO:0005576 extracellular region; GO:0005615 extracellular space; GO:0005622 intracellular; GO:0005623 cell; GO:0005634 nucleus; GO:0005654 nucleoplasm; GO:0005737 cytoplasm; GO:0005829 cytosol; GO:0005856 cytoskeleton; GO:0005886 plasma membrane; GO:0012505 endomembrane system; GO:0016020 membrane; GO:0030054 cell junction; GO:0030141 secretory granule; GO:0031410 cytoplasmic vesicle; GO:0031974 …	GO:0005102 signaling receptor binding; GO:0005488 binding; GO:0005504 fatty acid binding; GO:0005509 calcium ion binding; GO:0005515 protein binding; GO:0008017 microtubule binding; GO:0008092 cytoskeletal protein binding; GO:0008270 zinc ion binding; GO:0008289 lipid binding; GO:0015631 tubulin binding; GO:0031406 carboxylic acid binding; GO:0033293 monocarboxylic acid binding; GO:0035325 Toll-l…	PF01023	S-100/ICaBP type calcium binding domain
Q96KX0	Lysozyme-like protein 4 OS=Homo sapiens OX=9606 GN=LYZL4 PE=2 SV=1	LYZL4	0.4575	4.11257e-06	Down	16.433	39.7	5	5	0.653795	0.608667	0.620899	1.35471	1.38961	1.37232	extracellular				GO:0000003 reproduction; GO:0006950 response to stress; GO:0006952 defense response; GO:0008152 metabolic process; GO:0009056 catabolic process; GO:0009566 fertilization; GO:0009605 response to external stimulus; GO:0009607 response to biotic stimulus; GO:0009617 response to bacterium; GO:0009987 cellular process; GO:0016998 cell wall macromolecule catabolic process; GO:0019953 sexual reproductio…	GO:0001669 acrosomal vesicle; GO:0005576 extracellular region; GO:0005615 extracellular space; GO:0005622 intracellular; GO:0005623 cell; GO:0005737 cytoplasm; GO:0005929 cilium; GO:0012505 endomembrane system; GO:0030141 secretory granule; GO:0031410 cytoplasmic vesicle; GO:0031514 motile cilium; GO:0031982 vesicle; GO:0036126 sperm flagellum; GO:0042995 cell projection; GO:0043226 organelle; GO…	GO:0003796 lysozyme activity; GO:0003824 catalytic activity; GO:0004553 hydrolase activity, hydrolyzing O-glycosyl compounds; GO:0016787 hydrolase activity; GO:0016798 hydrolase activity, acting on glycosyl bonds; GO:0061783 peptidoglycan muralytic activity;	PF00062	C-type lysozyme/alpha-lactalbumin family
Q6UWU4	Bombesin receptor-activated protein C6orf89 OS=Homo sapiens OX=9606 GN=C6orf89 PE=1 SV=1	C6orf89	0.4581	0.000324809	Down	39.87	25.9	7	7	0.710759	0.606809	0.567426	1.33546	1.39898	1.38057	cytoplasm				GO:0006950 response to stress; GO:0008283 cell population proliferation; GO:0009611 response to wounding; GO:0009893 positive regulation of metabolic process; GO:0010604 positive regulation of macromolecule metabolic process; GO:0010638 positive regulation of organelle organization; GO:0019222 regulation of metabolic process; GO:0031056 regulation of histone modification; GO:0031058 positive regu…	GO:0000139 Golgi membrane; GO:0005622 intracellular; GO:0005623 cell; GO:0005634 nucleus; GO:0005730 nucleolus; GO:0005737 cytoplasm; GO:0005794 Golgi apparatus; GO:0005886 plasma membrane; GO:0012505 endomembrane system; GO:0016020 membrane; GO:0030496 midbody; GO:0031090 organelle membrane; GO:0031974 membrane-enclosed lumen; GO:0031981 nuclear lumen; GO:0031984 organelle subcompartment; GO:004…
Q92685	Dol-P-Man:Man(5)GlcNAc(2)-PP-Dol alpha-1,3-mannosyltransferase OS=Homo sapiens OX=9606 GN=ALG3 PE=1 SV=1	ALG3	0.4582	1.45182e-05	Down	50.126	6.4	3	3	0.596282	0.649834	0.639193	1.32875	1.3847	1.40125	plasma membrane	K03845	ALG3; alpha-1,3-mannosyltransferase [EC:2.4.1.258]	hsa00510 N-Glycan biosynthesis; hsa00513 Various types of N-glycan biosynthesis; hsa01100 Metabolic pathways	GO:0006464 cellular protein modification process; GO:0006486 protein glycosylation; GO:0006487 protein N-linked glycosylation; GO:0006488 dolichol-linked oligosaccharide biosynthetic process; GO:0006490 oligosaccharide-lipid intermediate biosynthetic process; GO:0006629 lipid metabolic process; GO:0006807 nitrogen compound metabolic process; GO:0008152 metabolic process; GO:0009058 biosynthetic p…	GO:0005622 intracellular; GO:0005623 cell; GO:0005737 cytoplasm; GO:0005783 endoplasmic reticulum; GO:0005789 endoplasmic reticulum membrane; GO:0012505 endomembrane system; GO:0016020 membrane; GO:0031984 organelle subcompartment; GO:0042175 nuclear outer membrane-endoplasmic reticulum membrane network; GO:0043226 organelle; GO:0043227 membrane-bounded organelle; GO:0043229 intracellular organel…	GO:0000030 mannosyltransferase activity; GO:0000033 alpha-1,3-mannosyltransferase activity; GO:0003824 catalytic activity; GO:0016740 transferase activity; GO:0016757 transferase activity, transferring glycosyl groups; GO:0016758 transferase activity, transferring hexosyl groups;			G	KOG2762	Mannosyltransferase
P38646	Stress-70 protein, mitochondrial OS=Homo sapiens OX=9606 GN=HSPA9 PE=1 SV=2	HSPA9	0.4602	2.80354e-06	Down	73.68	44.6	26	26	0.6402	0.612337	0.638379	1.33068	1.38843	1.38997	mitochondria	K04043	dnaK; molecular chaperone DnaK	hsa05152 Tuberculosis; hsa03018 RNA degradation	GO:0002262 myeloid cell homeostasis; GO:0002376 immune system process; GO:0002520 immune system development; GO:0002682 regulation of immune system process; GO:0002683 negative regulation of immune system process; GO:0006790 sulfur compound metabolic process; GO:0007154 cell communication; GO:0007165 signal transduction; GO:0007166 cell surface receptor signaling pathway; GO:0007275 multicellular…	GO:0005622 intracellular; GO:0005623 cell; GO:0005737 cytoplasm; GO:0005739 mitochondrion; GO:0005759 mitochondrial matrix; GO:0009295 nucleoid; GO:0031974 membrane-enclosed lumen; GO:0042645 mitochondrial nucleoid; GO:0043226 organelle; GO:0043227 membrane-bounded organelle; GO:0043228 non-membrane-bounded organelle; GO:0043229 intracellular organelle; GO:0043231 intracellular membrane-bounded o…	GO:0005488 binding; GO:0005515 protein binding; GO:0019899 enzyme binding; GO:0031625 ubiquitin protein ligase binding; GO:0044389 ubiquitin-like protein ligase binding; GO:0051082 unfolded protein binding;			O	KOG0102	Molecular chaperones mortalin/PBP74/GRP75, HSP70 superfamily
Q96E66	Leucine-rich repeat-containing protein 51 OS=Homo sapiens OX=9606 GN=LRTOMT PE=2 SV=1	LRTOMT	0.4616	0.0110288	Down	22.206	36.5	5	5	0.82857	0.452376	0.613973	1.44122	1.39946	1.2644	cytoplasm,nucleus									A	KOG1644	U2-associated snRNP A' protein
Q9BYD9	Actin-related protein T3 OS=Homo sapiens OX=9606 GN=ACTRT3 PE=2 SV=1	ACTRT3	0.4639	3.41312e-08	Down	41.007	50.8	12	12	0.63982	0.635541	0.625986	1.36601	1.37022	1.36242	plasma membrane					GO:0001673 male germ cell nucleus; GO:0005622 intracellular; GO:0005623 cell; GO:0005634 nucleus; GO:0043073 germ cell nucleus; GO:0043226 organelle; GO:0043227 membrane-bounded organelle; GO:0043229 intracellular organelle; GO:0043231 intracellular membrane-bounded organelle;				Z	KOG0676	Actin and related proteins
P01019	Angiotensinogen OS=Homo sapiens OX=9606 GN=AGT PE=1 SV=1	AGT	0.465	9.68437e-06	Down	53.154	13	5	5	0.651401	0.622196	0.630729	1.42353	1.31143	1.36071	extracellular	K09821	AGT; angiotensinogen	hsa05410 Hypertrophic cardiomyopathy; hsa04080 Neuroactive ligand-receptor interaction; hsa04072 Phospholipase D signaling pathway; hsa04270 Vascular smooth muscle contraction; hsa05200 Pathways in cancer [Cancer network viewer]; hsa04261 Adrenergic signaling in cardiomyocytes; hsa04927 Cortisol synthesis and secretion; hsa04924 Renin secretion; hsa05414 Dilated cardiomyopathy; hsa04934 Cushing s…	GO:0000003 reproduction; GO:0000165 MAPK cascade; GO:0001505 regulation of neurotransmitter levels; GO:0001542 ovulation from ovarian follicle; GO:0001543 ovarian follicle rupture; GO:0001558 regulation of cell growth; GO:0001568 blood vessel development; GO:0001655 urogenital system development; GO:0001657 ureteric bud development; GO:0001658 branching involved in ureteric bud morphogenesis; GO:…	GO:0005576 extracellular region; GO:0005615 extracellular space; GO:0005622 intracellular; GO:0005623 cell; GO:0005737 cytoplasm; GO:0005829 cytosol;	GO:0001664 G protein-coupled receptor binding; GO:0004857 enzyme inhibitor activity; GO:0004866 endopeptidase inhibitor activity; GO:0004867 serine-type endopeptidase inhibitor activity; GO:0005102 signaling receptor binding; GO:0005179 hormone activity; GO:0005488 binding; GO:0005515 protein binding; GO:0008047 enzyme activator activity; GO:0008083 growth factor activity; GO:0016176 superoxide-g…	PF00079	Serpin (serine protease inhibitor)	V	KOG2392	Serpin
Q6P2H8	Transmembrane protein 53 OS=Homo sapiens OX=9606 GN=TMEM53 PE=2 SV=1	TMEM53	0.465	1.21394e-07	Down	31.63	28.9	7	7	0.625185	0.642931	0.636276	1.37496	1.36503	1.35562	cytoplasm							PF05705	Eukaryotic protein of unknown function (DUF829)	S	KOG2521	Uncharacterized conserved protein
O75190	DnaJ homolog subfamily B member 6 OS=Homo sapiens OX=9606 GN=DNAJB6 PE=1 SV=2	DNAJB6	0.4654	0.00123109	Down	36.087	17.5	6	4	0.669622	0.665444	0.570477	1.2476	1.58298	1.26388	nucleus	K09512			GO:0000003 reproduction; GO:0001701 in utero embryonic development; GO:0001890 placenta development; GO:0001892 embryonic placenta development; GO:0003006 developmental process involved in reproduction; GO:0006355 regulation of transcription, DNA-templated; GO:0006457 protein folding; GO:0006996 organelle organization; GO:0007010 cytoskeleton organization; GO:0007155 cell adhesion; GO:0007275 mul…	GO:0005622 intracellular; GO:0005623 cell; GO:0005634 nucleus; GO:0005654 nucleoplasm; GO:0005737 cytoplasm; GO:0005829 cytosol; GO:0030016 myofibril; GO:0030017 sarcomere; GO:0030018 Z disc; GO:0031674 I band; GO:0031974 membrane-enclosed lumen; GO:0031981 nuclear lumen; GO:0043226 organelle; GO:0043227 membrane-bounded organelle; GO:0043228 non-membrane-bounded organelle; GO:0043229 intracellul…	GO:0001671 ATPase activator activity; GO:0003676 nucleic acid binding; GO:0003677 DNA binding; GO:0005488 binding; GO:0005515 protein binding; GO:0008047 enzyme activator activity; GO:0030234 enzyme regulator activity; GO:0031072 heat shock protein binding; GO:0042802 identical protein binding; GO:0044183 protein folding chaperone; GO:0051082 unfolded protein binding; GO:0051087 chaperone binding…	PF00226	DnaJ domain	O	KOG0714	Molecular chaperone (DnaJ superfamily)
Q96JD6	1,5-anhydro-D-fructose reductase OS=Homo sapiens OX=9606 GN=AKR1E2 PE=1 SV=2	AKR1E2	0.4654	0.0406405	Down	36.589	10.6	3	3	0.785399	0.779736	0.340467	1.29243	1.36192	1.44004	cytoplasm	K13981			GO:0008152 metabolic process; GO:0055114 oxidation-reduction process;	GO:0005622 intracellular; GO:0005623 cell; GO:0005634 nucleus; GO:0005654 nucleoplasm; GO:0005737 cytoplasm; GO:0005794 Golgi apparatus; GO:0005829 cytosol; GO:0012505 endomembrane system; GO:0031974 membrane-enclosed lumen; GO:0031981 nuclear lumen; GO:0043226 organelle; GO:0043227 membrane-bounded organelle; GO:0043229 intracellular organelle; GO:0043231 intracellular membrane-bounded organelle…	GO:0003824 catalytic activity; GO:0016491 oxidoreductase activity;	PF00248	Aldo/keto reductase family	S	KOG1577	Aldo/keto reductase family proteins
Q9BV79	Enoyl-[acyl-carrier-protein] reductase, mitochondrial OS=Homo sapiens OX=9606 GN=MECR PE=1 SV=2	MECR	0.4667	0.000110177	Down	40.461	14.5	5	5	0.581493	0.672931	0.654677	1.35979	1.41976	1.31135	mitochondria	K07512	MECR; mitochondrial enoyl-[acyl-carrier protein] reductase / trans-2-enoyl-CoA reductase [EC:1.3.1.- 1.3.1.38]	hsa00062 Fatty acid elongation; hsa00061 Fatty acid biosynthesis; hsa01212 Fatty acid metabolism; hsa01100 Metabolic pathways	GO:0006082 organic acid metabolic process; GO:0006629 lipid metabolic process; GO:0006631 fatty acid metabolic process; GO:0006635 fatty acid beta-oxidation; GO:0008152 metabolic process; GO:0009056 catabolic process; GO:0009062 fatty acid catabolic process; GO:0009987 cellular process; GO:0016042 lipid catabolic process; GO:0016054 organic acid catabolic process; GO:0019395 fatty acid oxidation;…	GO:0005622 intracellular; GO:0005623 cell; GO:0005634 nucleus; GO:0005737 cytoplasm; GO:0005739 mitochondrion; GO:0005759 mitochondrial matrix; GO:0005829 cytosol; GO:0031974 membrane-enclosed lumen; GO:0043226 organelle; GO:0043227 membrane-bounded organelle; GO:0043229 intracellular organelle; GO:0043231 intracellular membrane-bounded organelle; GO:0043233 organelle lumen; GO:0070013 intracellu…	GO:0003824 catalytic activity; GO:0005102 signaling receptor binding; GO:0005488 binding; GO:0005515 protein binding; GO:0008134 transcription factor binding; GO:0016491 oxidoreductase activity; GO:0016627 oxidoreductase activity, acting on the CH-CH group of donors; GO:0016628 oxidoreductase activity, acting on the CH-CH group of donors, NAD or NADP as acceptor; GO:0016922 nuclear receptor bindi…	PF08240	Alcohol dehydrogenase GroES-like domain	CK	KOG0025	Zn2+-binding dehydrogenase (nuclear receptor binding factor-1)
P16083	Ribosyldihydronicotinamide dehydrogenase [quinone] OS=Homo sapiens OX=9606 GN=NQO2 PE=1 SV=5	NQO2	0.4677	3.70804e-05	Down	25.918	43.7	7	7	0.598954	0.647922	0.6652	1.31966	1.34966	1.41861	cytoplasm	K08071			GO:0006091 generation of precursor metabolites and energy; GO:0006805 xenobiotic metabolic process; GO:0008152 metabolic process; GO:0009410 response to xenobiotic stimulus; GO:0009987 cellular process; GO:0022900 electron transport chain; GO:0042221 response to chemical; GO:0044237 cellular metabolic process; GO:0050896 response to stimulus; GO:0051716 cellular response to stimulus; GO:0055114 o…	GO:0005622 intracellular; GO:0005623 cell; GO:0005634 nucleus; GO:0005654 nucleoplasm; GO:0005737 cytoplasm; GO:0005829 cytosol; GO:0031974 membrane-enclosed lumen; GO:0031981 nuclear lumen; GO:0043226 organelle; GO:0043227 membrane-bounded organelle; GO:0043229 intracellular organelle; GO:0043231 intracellular membrane-bounded organelle; GO:0043233 organelle lumen; GO:0070013 intracellular organ…	GO:0000166 nucleotide binding; GO:0001512 dihydronicotinamide riboside quinone reductase activity; GO:0003824 catalytic activity; GO:0005488 binding; GO:0005515 protein binding; GO:0008144 drug binding; GO:0008270 zinc ion binding; GO:0009055 electron transfer activity; GO:0016491 oxidoreductase activity; GO:0016661 oxidoreductase activity, acting on other nitrogenous compounds as donors; GO:0031…	PF02525	Flavodoxin-like fold
Q3B820	Protein FAM161A OS=Homo sapiens OX=9606 GN=FAM161A PE=1 SV=2	FAM161A	0.4678	0.00778828	Down	76.751	12.1	6	6	0.701921	0.707742	0.502448	1.24424	1.65774	1.18591	mitochondria	K16772			GO:0006996 organelle organization; GO:0009893 positive regulation of metabolic process; GO:0009987 cellular process; GO:0010604 positive regulation of macromolecule metabolic process; GO:0016043 cellular component organization; GO:0019222 regulation of metabolic process; GO:0022607 cellular component assembly; GO:0030030 cell projection organization; GO:0030031 cell projection assembly; GO:003132…	GO:0000235 astral microtubule; GO:0000922 spindle pole; GO:0001917 photoreceptor inner segment; GO:0005622 intracellular; GO:0005623 cell; GO:0005737 cytoplasm; GO:0005813 centrosome; GO:0005814 centriole; GO:0005815 microtubule organizing center; GO:0005818 aster; GO:0005819 spindle; GO:0005856 cytoskeleton; GO:0005874 microtubule; GO:0005876 spindle microtubule; GO:0005881 cytoplasmic microtubu…	GO:0005488 binding; GO:0005515 protein binding; GO:0008017 microtubule binding; GO:0008092 cytoskeletal protein binding; GO:0015631 tubulin binding; GO:0042802 identical protein binding;
Q04727	Transducin-like enhancer protein 4 OS=Homo sapiens OX=9606 GN=TLE4 PE=1 SV=3	TLE4	0.4688	2.57496e-05	Down	83.754	27.8	14	14	0.627429	0.617186	0.670347	1.29822	1.39823	1.38858	nucleus				GO:0000122 negative regulation of transcription by RNA polymerase II; GO:0006355 regulation of transcription, DNA-templated; GO:0006357 regulation of transcription by RNA polymerase II; GO:0007154 cell communication; GO:0007165 signal transduction; GO:0007166 cell surface receptor signaling pathway; GO:0007267 cell-cell signaling; GO:0009889 regulation of biosynthetic process; GO:0009890 negative…	GO:0005622 intracellular; GO:0005623 cell; GO:0005634 nucleus; GO:0005654 nucleoplasm; GO:0005667 transcription regulator complex; GO:0031974 membrane-enclosed lumen; GO:0031981 nuclear lumen; GO:0032991 protein-containing complex; GO:0043226 organelle; GO:0043227 membrane-bounded organelle; GO:0043229 intracellular organelle; GO:0043231 intracellular membrane-bounded organelle; GO:0043233 organe…	GO:0000981 DNA-binding transcription factor activity, RNA polymerase II-specific; GO:0003682 chromatin binding; GO:0003700 DNA-binding transcription factor activity; GO:0003712 transcription coregulator activity; GO:0003714 transcription corepressor activity; GO:0005488 binding; GO:0005515 protein binding; GO:0008134 transcription factor binding; GO:0070491 repressing transcription factor binding…			B	KOG0639	Transducin-like enhancer of split protein (contains WD40 repeats)
P40306	Proteasome subunit beta type-10 OS=Homo sapiens OX=9606 GN=PSMB10 PE=1 SV=1	PSMB10	0.469	0.0142522	Down	28.936	13.6	2	2	0.700844	0.530028	0.684824	0.998128	1.39021	1.69597	cytoplasm	K02733	PSMB10; 20S proteasome subunit beta 10 [EC:3.4.25.1]	hsa03050 Proteasome	GO:0000902 cell morphogenesis; GO:0001775 cell activation; GO:0002376 immune system process; GO:0006464 cellular protein modification process; GO:0006508 proteolysis; GO:0006807 nitrogen compound metabolic process; GO:0006955 immune response; GO:0006959 humoral immune response; GO:0008152 metabolic process; GO:0008283 cell population proliferation; GO:0009653 anatomical structure morphogenesis; G…	GO:0000502 proteasome complex; GO:0005622 intracellular; GO:0005623 cell; GO:0005634 nucleus; GO:0005654 nucleoplasm; GO:0005737 cytoplasm; GO:0005829 cytosol; GO:0005839 proteasome core complex; GO:0019774 proteasome core complex, beta-subunit complex; GO:0031974 membrane-enclosed lumen; GO:0031981 nuclear lumen; GO:0032991 protein-containing complex; GO:0043226 organelle; GO:0043227 membrane-bo…		PF00227	Proteasome subunit	O	KOG0173	20S proteasome, regulatory subunit beta type PSMB7/PSMB10/PUP1
Q8IXY8	Probable inactive peptidyl-prolyl cis-trans isomerase-like 6 OS=Homo sapiens OX=9606 GN=PPIL6 PE=1 SV=1	PPIL6	0.4703	1.34849e-06	Down	35.228	34.1	8	8	0.625907	0.648975	0.644338	1.33925	1.34845	1.39308	cytoplasm	K12739			GO:0000413 protein peptidyl-prolyl isomerization; GO:0006464 cellular protein modification process; GO:0006807 nitrogen compound metabolic process; GO:0008152 metabolic process; GO:0009987 cellular process; GO:0018193 peptidyl-amino acid modification; GO:0018208 peptidyl-proline modification; GO:0019538 protein metabolic process; GO:0036211 protein modification process; GO:0043170 macromolecule m…		GO:0003755 peptidyl-prolyl cis-trans isomerase activity; GO:0003824 catalytic activity; GO:0016853 isomerase activity; GO:0016859 cis-trans isomerase activity; GO:0140096 catalytic activity, acting on a protein;	PF00160	Cyclophilin type peptidyl-prolyl cis-trans isomerase/CLD	O	KOG0546	HSP90 co-chaperone CPR7/Cyclophilin
P31937	3-hydroxyisobutyrate dehydrogenase, mitochondrial OS=Homo sapiens OX=9606 GN=HIBADH PE=1 SV=2	HIBADH	0.4706	6.18361e-06	Down	35.329	39.6	11	11	0.614167	0.66084	0.644894	1.34032	1.38878	1.351	mitochondria	K00020	HIBADH; 3-hydroxyisobutyrate dehydrogenase [EC:1.1.1.31]	hsa00280 Valine, leucine and isoleucine degradation; hsa01100 Metabolic pathways	GO:0006082 organic acid metabolic process; GO:0006520 cellular amino acid metabolic process; GO:0006573 valine metabolic process; GO:0006574 valine catabolic process; GO:0006807 nitrogen compound metabolic process; GO:0008152 metabolic process; GO:0009056 catabolic process; GO:0009063 cellular amino acid catabolic process; GO:0009081 branched-chain amino acid metabolic process; GO:0009083 branche…	GO:0005622 intracellular; GO:0005623 cell; GO:0005737 cytoplasm; GO:0005739 mitochondrion; GO:0005759 mitochondrial matrix; GO:0031974 membrane-enclosed lumen; GO:0043226 organelle; GO:0043227 membrane-bounded organelle; GO:0043229 intracellular organelle; GO:0043231 intracellular membrane-bounded organelle; GO:0043233 organelle lumen; GO:0070013 intracellular organelle lumen;	GO:0003824 catalytic activity; GO:0008442 3-hydroxyisobutyrate dehydrogenase activity; GO:0016491 oxidoreductase activity; GO:0016614 oxidoreductase activity, acting on CH-OH group of donors; GO:0016616 oxidoreductase activity, acting on the CH-OH group of donors, NAD or NADP as acceptor;	PF03446	NAD binding domain of 6-phosphogluconate dehydrogenase	I	KOG0409	Predicted dehydrogenase
P59282	Tubulin polymerization-promoting protein family member 2 OS=Homo sapiens OX=9606 GN=TPPP2 PE=1 SV=2	TPPP2	0.4729	4.85339e-05	Down	18.502	40	5	5	0.67809	0.652798	0.595631	1.3894	1.34451	1.33957	cytoplasm					GO:0005622 intracellular; GO:0005623 cell; GO:0005737 cytoplasm; GO:0005829 cytosol;	GO:0005488 binding; GO:0005515 protein binding; GO:0008092 cytoskeletal protein binding; GO:0015631 tubulin binding;	PF05517	p25-alpha	T	KOG4070	Putative signal transduction protein p25
Q9BS86	Zona pellucida-binding protein 1 OS=Homo sapiens OX=9606 GN=ZPBP PE=2 SV=1	ZPBP	0.4735	2.9189e-06	Down	40.141	50.4	17	17	0.633973	0.638844	0.655309	1.32543	1.40261	1.34383	extracellular				GO:0000003 reproduction; GO:0001675 acrosome assembly; GO:0003006 developmental process involved in reproduction; GO:0006996 organelle organization; GO:0007276 gamete generation; GO:0007281 germ cell development; GO:0007283 spermatogenesis; GO:0007286 spermatid development; GO:0007338 single fertilization; GO:0007339 binding of sperm to zona pellucida; GO:0008037 cell recognition; GO:0009566 fert…	GO:0001669 acrosomal vesicle; GO:0002199 zona pellucida receptor complex; GO:0005622 intracellular; GO:0005623 cell; GO:0005737 cytoplasm; GO:0012505 endomembrane system; GO:0030141 secretory granule; GO:0031410 cytoplasmic vesicle; GO:0031982 vesicle; GO:0032991 protein-containing complex; GO:0043226 organelle; GO:0043227 membrane-bounded organelle; GO:0043229 intracellular organelle; GO:0044297…
A8MTL0	IQ domain-containing protein F5 OS=Homo sapiens OX=9606 GN=IQCF5 PE=2 SV=2	IQCF5	0.4739	2.32578e-07	Down	18.048	33.1	5	5	0.636473	0.636347	0.656467	1.35361	1.36135	1.35575	extracellular						GO:0005488 binding; GO:0005515 protein binding; GO:0005516 calmodulin binding;
Q07960	Rho GTPase-activating protein 1 OS=Homo sapiens OX=9606 GN=ARHGAP1 PE=1 SV=1	ARHGAP1	0.4744	0.00205393	Down	50.435	16.6	6	6	0.686178	0.545585	0.698828	1.18655	1.38633	1.49653	cytoplasm	K18470			GO:0000041 transition metal ion transport; GO:0006810 transport; GO:0006811 ion transport; GO:0006812 cation transport; GO:0006826 iron ion transport; GO:0007154 cell communication; GO:0007165 signal transduction; GO:0007264 small GTPase mediated signal transduction; GO:0007265 Ras protein signal transduction; GO:0007266 Rho protein signal transduction; GO:0008104 protein localization; GO:0009966…	GO:0001726 ruffle; GO:0005622 intracellular; GO:0005623 cell; GO:0005737 cytoplasm; GO:0005768 endosome; GO:0005829 cytosol; GO:0005886 plasma membrane; GO:0010008 endosome membrane; GO:0012505 endomembrane system; GO:0016020 membrane; GO:0031090 organelle membrane; GO:0031252 cell leading edge; GO:0031410 cytoplasmic vesicle; GO:0031982 vesicle; GO:0042995 cell projection; GO:0043226 organelle; …	GO:0005096 GTPase activator activity; GO:0005488 binding; GO:0005515 protein binding; GO:0008047 enzyme activator activity; GO:0017016 Ras GTPase binding; GO:0017137 Rab GTPase binding; GO:0019899 enzyme binding; GO:0030234 enzyme regulator activity; GO:0030674 protein-macromolecule adaptor activity; GO:0030695 GTPase regulator activity; GO:0031267 small GTPase binding; GO:0035591 signaling adapt…	PF13716; PF00620	Divergent CRAL/TRIO domain; RhoGAP domain	T	KOG4406	CDC42 Rho GTPase-activating protein
Q9NQT6	Fascin-3 OS=Homo sapiens OX=9606 GN=FSCN3 PE=2 SV=1	FSCN3	0.4745	3.502e-06	Down	56.623	46	16	16	0.662044	0.642977	0.625733	1.34431	1.39051	1.33443	nucleus	K17456			GO:0000003 reproduction; GO:0003006 developmental process involved in reproduction; GO:0006928 movement of cell or subcellular component; GO:0006996 organelle organization; GO:0007010 cytoskeleton organization; GO:0007015 actin filament organization; GO:0007163 establishment or maintenance of cell polarity; GO:0007276 gamete generation; GO:0007281 germ cell development; GO:0007283 spermatogenesis…	GO:0001726 ruffle; GO:0005622 intracellular; GO:0005623 cell; GO:0005737 cytoplasm; GO:0005856 cytoskeleton; GO:0005884 actin filament; GO:0005886 plasma membrane; GO:0005902 microvillus; GO:0015629 actin cytoskeleton; GO:0016020 membrane; GO:0030027 lamellipodium; GO:0030175 filopodium; GO:0030424 axon; GO:0030426 growth cone; GO:0030427 site of polarized growth; GO:0031252 cell leading edge; GO…	GO:0003779 actin binding; GO:0005488 binding; GO:0005515 protein binding; GO:0008092 cytoskeletal protein binding; GO:0044877 protein-containing complex binding; GO:0051015 actin filament binding;	PF06268	Fascin domain
Q9UMS0	NFU1 iron-sulfur cluster scaffold homolog, mitochondrial OS=Homo sapiens OX=9606 GN=NFU1 PE=1 SV=2	NFU1	0.4755	0.0056002	Down	28.462	11.4	2	2	0.61208	0.59149		1.22496	1.11312	1.45835	mitochondria	K22074			GO:0006790 sulfur compound metabolic process; GO:0008152 metabolic process; GO:0009987 cellular process; GO:0016043 cellular component organization; GO:0016226 iron-sulfur cluster assembly; GO:0022607 cellular component assembly; GO:0031163 metallo-sulfur cluster assembly; GO:0044085 cellular component biogenesis; GO:0044237 cellular metabolic process; GO:0051186 cofactor metabolic process; GO:00…	GO:0005622 intracellular; GO:0005623 cell; GO:0005634 nucleus; GO:0005654 nucleoplasm; GO:0005737 cytoplasm; GO:0005739 mitochondrion; GO:0005829 cytosol; GO:0031974 membrane-enclosed lumen; GO:0031981 nuclear lumen; GO:0043226 organelle; GO:0043227 membrane-bounded organelle; GO:0043229 intracellular organelle; GO:0043231 intracellular membrane-bounded organelle; GO:0043233 organelle lumen; GO:0…	GO:0005488 binding; GO:0005506 iron ion binding; GO:0043167 ion binding; GO:0043169 cation binding; GO:0046872 metal ion binding; GO:0046914 transition metal ion binding; GO:0048037 cofactor binding; GO:0051536 iron-sulfur cluster binding; GO:0051539 4 iron, 4 sulfur cluster binding; GO:0051540 metal cluster binding;	PF08712	Scaffold protein Nfu/NifU N terminal	O	KOG2358	NifU-like domain-containing proteins
P49748	Very long-chain specific acyl-CoA dehydrogenase, mitochondrial OS=Homo sapiens OX=9606 GN=ACADVL PE=1 SV=1	ACADVL	0.4759	2.39236e-06	Down	70.389	47.3	24	24	0.622743	0.652307	0.65962	1.34361	1.37163	1.35009	mitochondria	K09479	ACADVL; very long chain acyl-CoA dehydrogenase [EC:1.3.8.9]	hsa00071 Fatty acid degradation; hsa01212 Fatty acid metabolism; hsa01100 Metabolic pathways	GO:0000038 very long-chain fatty acid metabolic process; GO:0001659 temperature homeostasis; GO:0006082 organic acid metabolic process; GO:0006091 generation of precursor metabolites and energy; GO:0006629 lipid metabolic process; GO:0006631 fatty acid metabolic process; GO:0006635 fatty acid beta-oxidation; GO:0006950 response to stress; GO:0006986 response to unfolded protein; GO:0007154 cell c…	GO:0005622 intracellular; GO:0005623 cell; GO:0005634 nucleus; GO:0005730 nucleolus; GO:0005737 cytoplasm; GO:0005739 mitochondrion; GO:0005740 mitochondrial envelope; GO:0005743 mitochondrial inner membrane; GO:0005759 mitochondrial matrix; GO:0005829 cytosol; GO:0009295 nucleoid; GO:0016020 membrane; GO:0019866 organelle inner membrane; GO:0031090 organelle membrane; GO:0031966 mitochondrial me…	GO:0000062 fatty-acyl-CoA binding; GO:0000166 nucleotide binding; GO:0003824 catalytic activity; GO:0003995 acyl-CoA dehydrogenase activity; GO:0004466 long-chain-acyl-CoA dehydrogenase activity; GO:0005488 binding; GO:0016491 oxidoreductase activity; GO:0016627 oxidoreductase activity, acting on the CH-CH group of donors; GO:0017076 purine nucleotide binding; GO:0017099 very-long-chain-acyl-CoA …	PF02771; PF02770; PF00441	Acyl-CoA dehydrogenase, N-terminal domain; Acyl-CoA dehydrogenase, middle domain; Acyl-CoA dehydrogenase, C-terminal domain	C	KOG0137	Very-long-chain acyl-CoA dehydrogenase
P49901	Sperm mitochondrial-associated cysteine-rich protein OS=Homo sapiens OX=9606 GN=SMCP PE=1 SV=2	SMCP	0.4762	2.16621e-05	Down	12.767	71.6	6	6	0.6631	0.631941	0.640405	1.27848	1.38036	1.40572	extracellular				GO:0000003 reproduction; GO:0006928 movement of cell or subcellular component; GO:0007338 single fertilization; GO:0007341 penetration of zona pellucida; GO:0009566 fertilization; GO:0009987 cellular process; GO:0019953 sexual reproduction; GO:0022414 reproductive process; GO:0030317 flagellated sperm motility; GO:0032501 multicellular organismal process; GO:0032504 multicellular organism reprodu…	GO:0005622 intracellular; GO:0005623 cell; GO:0005737 cytoplasm; GO:0005739 mitochondrion; GO:0043226 organelle; GO:0043227 membrane-bounded organelle; GO:0043229 intracellular organelle; GO:0043231 intracellular membrane-bounded organelle;
O95166	Gamma-aminobutyric acid receptor-associated protein OS=Homo sapiens OX=9606 GN=GABARAP PE=1 SV=1	GABARAP	0.4763	0.022669	Down	13.918	9.4	2	2	0.639622	0.638867	0.80519	1.1943	1.72202		nucleus	K08341	GABARAP; GABA(A) receptor-associated protein	hsa04140 Autophagy - animal; hsa04727 GABAergic synapse; hsa04371 Apelin signaling pathway; hsa05131 Shigellosis; hsa04621 NOD-like receptor signaling pathway; hsa04136 Autophagy - other; hsa04137 Mitophagy - animal; hsa05022 Pathways of neurodegeneration - multiple diseases; hsa05167 Kaposi sarcoma-associated herpesvirus infection; hsa05014 Amyotrophic lateral sclerosis; hsa04068 FoxO signaling …	GO:0000045 autophagosome assembly; GO:0000226 microtubule cytoskeleton organization; GO:0000422 autophagy of mitochondrion; GO:0006605 protein targeting; GO:0006810 transport; GO:0006886 intracellular protein transport; GO:0006914 autophagy; GO:0006915 apoptotic process; GO:0006950 response to stress; GO:0006995 cellular response to nitrogen starvation; GO:0006996 organelle organization; GO:00070…	GO:0000323 lytic vacuole; GO:0000421 autophagosome membrane; GO:0005622 intracellular; GO:0005623 cell; GO:0005737 cytoplasm; GO:0005764 lysosome; GO:0005773 vacuole; GO:0005774 vacuolar membrane; GO:0005776 autophagosome; GO:0005783 endoplasmic reticulum; GO:0005790 smooth endoplasmic reticulum; GO:0005794 Golgi apparatus; GO:0005829 cytosol; GO:0005856 cytoskeleton; GO:0005875 microtubule assoc…	GO:0005102 signaling receptor binding; GO:0005488 binding; GO:0005515 protein binding; GO:0008017 microtubule binding; GO:0008092 cytoskeletal protein binding; GO:0015631 tubulin binding; GO:0019899 enzyme binding; GO:0031625 ubiquitin protein ligase binding; GO:0044389 ubiquitin-like protein ligase binding; GO:0048487 beta-tubulin binding; GO:0050811 GABA receptor binding;	PF02991	Autophagy protein Atg8 ubiquitin like	Z	KOG1654	Microtubule-associated anchor protein involved in autophagy and membrane trafficking
A5D8W1	Cilia- and flagella-associated protein 69 OS=Homo sapiens OX=9606 GN=CFAP69 PE=1 SV=3	CFAP69	0.4786	0.000106089	Down	105.88	20.2	14	14	0.669663	0.679512	0.592918	1.34346	1.40691	1.30754	plasma membrane	K24227
P99999	Cytochrome c OS=Homo sapiens OX=9606 GN=CYCS PE=1 SV=2	CYCS	0.4789	0.000128606	Down	11.749	55.2	6	6	0.661413	0.666237	0.615146	1.29456	1.29018	1.47247	mitochondria	K08738	CYC; cytochrome c	hsa05160 Hepatitis C; hsa05200 Pathways in cancer [Cancer network viewer]; hsa05161 Hepatitis B; hsa05170 Human immunodeficiency virus 1 infection; hsa05169 Epstein-Barr virus infection; hsa05131 Shigellosis; hsa05012 Parkinson disease; hsa05010 Alzheimer disease; hsa05132 Salmonella infection; hsa05416 Viral myocarditis; hsa05168 Herpes simplex virus 1 infection; hsa05210 Colorectal cancer; hsa0…	GO:0006091 generation of precursor metabolites and energy; GO:0006119 oxidative phosphorylation; GO:0006122 mitochondrial electron transport, ubiquinol to cytochrome c; GO:0006123 mitochondrial electron transport, cytochrome c to oxygen; GO:0006139 nucleobase-containing compound metabolic process; GO:0006163 purine nucleotide metabolic process; GO:0006725 cellular aromatic compound metabolic proc…	GO:0000159 protein phosphatase type 2A complex; GO:0005622 intracellular; GO:0005623 cell; GO:0005634 nucleus; GO:0005737 cytoplasm; GO:0005739 mitochondrion; GO:0005740 mitochondrial envelope; GO:0005743 mitochondrial inner membrane; GO:0005758 mitochondrial intermembrane space; GO:0005829 cytosol; GO:0008287 protein serine/threonine phosphatase complex; GO:0016020 membrane; GO:0019866 organelle…	GO:0003824 catalytic activity; GO:0005488 binding; GO:0009055 electron transfer activity; GO:0016491 oxidoreductase activity; GO:0020037 heme binding; GO:0045155 electron transporter, transferring electrons from CoQH2-cytochrome c reductase complex and cytochrome c oxidase complex activity; GO:0046906 tetrapyrrole binding; GO:0048037 cofactor binding; GO:0097159 organic cyclic compound binding; G…	PF00034	Cytochrome c	C	KOG3453	Cytochrome c
Q6NUT2	Probable C-mannosyltransferase DPY19L2 OS=Homo sapiens OX=9606 GN=DPY19L2 PE=1 SV=2	DPY19L2	0.479	3.3143e-06	Down	87.373	28.8	17	17	0.624787	0.6655	0.653029	1.37218	1.34239	1.34211	plasma membrane	K24553			GO:0000003 reproduction; GO:0003006 developmental process involved in reproduction; GO:0006464 cellular protein modification process; GO:0006486 protein glycosylation; GO:0006807 nitrogen compound metabolic process; GO:0007276 gamete generation; GO:0007281 germ cell development; GO:0007283 spermatogenesis; GO:0007286 spermatid development; GO:0008152 metabolic process; GO:0009058 biosynthetic pro…	GO:0005622 intracellular; GO:0005623 cell; GO:0005634 nucleus; GO:0005635 nuclear envelope; GO:0005637 nuclear inner membrane; GO:0012505 endomembrane system; GO:0016020 membrane; GO:0019866 organelle inner membrane; GO:0031090 organelle membrane; GO:0031965 nuclear membrane; GO:0031967 organelle envelope; GO:0031975 envelope; GO:0043226 organelle; GO:0043227 membrane-bounded organelle; GO:004322…	GO:0000030 mannosyltransferase activity; GO:0003824 catalytic activity; GO:0016740 transferase activity; GO:0016757 transferase activity, transferring glycosyl groups; GO:0016758 transferase activity, transferring hexosyl groups;			S	KOG4587	Predicted membrane protein
P49411	Elongation factor Tu, mitochondrial OS=Homo sapiens OX=9606 GN=TUFM PE=1 SV=2	TUFM	0.4801	0.000579493	Down	49.541	39.2	15	15	0.652883	0.676772	0.616686	1.17953	1.48487	1.38926	mitochondria	K02358			GO:0006412 translation; GO:0006414 translational elongation; GO:0006518 peptide metabolic process; GO:0006807 nitrogen compound metabolic process; GO:0008152 metabolic process; GO:0009058 biosynthetic process; GO:0009059 macromolecule biosynthetic process; GO:0009636 response to toxic substance; GO:0009987 cellular process; GO:0010033 response to organic substance; GO:0010467 gene expression; GO:…	GO:0005622 intracellular; GO:0005623 cell; GO:0005737 cytoplasm; GO:0005739 mitochondrion; GO:0005740 mitochondrial envelope; GO:0005743 mitochondrial inner membrane; GO:0005759 mitochondrial matrix; GO:0009295 nucleoid; GO:0016020 membrane; GO:0019866 organelle inner membrane; GO:0031090 organelle membrane; GO:0031966 mitochondrial membrane; GO:0031967 organelle envelope; GO:0031974 membrane-enc…	GO:0003676 nucleic acid binding; GO:0003723 RNA binding; GO:0003746 translation elongation factor activity; GO:0005488 binding; GO:0008135 translation factor activity, RNA binding; GO:0097159 organic cyclic compound binding; GO:1901363 heterocyclic compound binding;	PF00009; PF03144; PF03143	Elongation factor Tu GTP binding domain; Elongation factor Tu domain 2; Elongation factor Tu C-terminal domain	J	KOG0460	Mitochondrial translation elongation factor Tu
P01040	Cystatin-A OS=Homo sapiens OX=9606 GN=CSTA PE=1 SV=1	CSTA	0.481	7.3839e-05	Down	11.006	50	4	4	0.666794	0.602418	0.679601	1.37913	1.2904	1.38166	cytoplasm	K13907			GO:0006464 cellular protein modification process; GO:0006807 nitrogen compound metabolic process; GO:0007155 cell adhesion; GO:0007275 multicellular organism development; GO:0008152 metabolic process; GO:0008219 cell death; GO:0008544 epidermis development; GO:0009888 tissue development; GO:0009892 negative regulation of metabolic process; GO:0009913 epidermal cell differentiation; GO:0009987 cel…	GO:0001533 cornified envelope; GO:0005576 extracellular region; GO:0005615 extracellular space; GO:0005622 intracellular; GO:0005623 cell; GO:0005634 nucleus; GO:0005737 cytoplasm; GO:0005829 cytosol; GO:0005886 plasma membrane; GO:0016020 membrane; GO:0043226 organelle; GO:0043227 membrane-bounded organelle; GO:0043229 intracellular organelle; GO:0043231 intracellular membrane-bounded organelle;…	GO:0002020 protease binding; GO:0004857 enzyme inhibitor activity; GO:0004866 endopeptidase inhibitor activity; GO:0004869 cysteine-type endopeptidase inhibitor activity; GO:0005198 structural molecule activity; GO:0005488 binding; GO:0005515 protein binding; GO:0019899 enzyme binding; GO:0030234 enzyme regulator activity; GO:0030414 peptidase inhibitor activity; GO:0030674 protein-macromolecule …	PF00031	Cystatin domain
Q96MT7	Cilia- and flagella-associated protein 44 OS=Homo sapiens OX=9606 GN=CFAP44 PE=1 SV=2	CFAP44	0.4812	4.52813e-07	Down	213.86	21.7	31	31	0.656492	0.638831	0.653854	1.35008	1.37061	1.33013	nucleus	K24224			GO:0001539 cilium or flagellum-dependent cell motility; GO:0006928 movement of cell or subcellular component; GO:0009987 cellular process; GO:0040011 locomotion; GO:0048870 cell motility; GO:0051179 localization; GO:0051674 localization of cell; GO:0060285 cilium-dependent cell motility;					S	KOG2106	Uncharacterized conserved protein, contains HELP and WD40 domains
P00441	Superoxide dismutase [Cu-Zn] OS=Homo sapiens OX=9606 GN=SOD1 PE=1 SV=2	SOD1	0.4815	2.85181e-06	Down	15.936	64.9	7	7	0.644221	0.633517	0.67241	1.33471	1.36876	1.34638	cytoplasm	K04565	SOD1; superoxide dismutase, Cu-Zn family [EC:1.15.1.1]	hsa05016 Huntington disease; hsa05022 Pathways of neurodegeneration - multiple diseases; hsa04146 Peroxisome; hsa05014 Amyotrophic lateral sclerosis; hsa04213 Longevity regulating pathway - multiple species; hsa05020 Prion disease	GO:0000003 reproduction; GO:0000187 activation of MAPK activity; GO:0000209 protein polyubiquitination; GO:0000302 response to reactive oxygen species; GO:0000303 response to superoxide; GO:0000305 response to oxygen radical; GO:0000902 cell morphogenesis; GO:0000904 cell morphogenesis involved in differentiation; GO:0001541 ovarian follicle development; GO:0001817 regulation of cytokine producti…	GO:0000323 lytic vacuole; GO:0005576 extracellular region; GO:0005615 extracellular space; GO:0005622 intracellular; GO:0005623 cell; GO:0005634 nucleus; GO:0005654 nucleoplasm; GO:0005737 cytoplasm; GO:0005739 mitochondrion; GO:0005740 mitochondrial envelope; GO:0005758 mitochondrial intermembrane space; GO:0005759 mitochondrial matrix; GO:0005764 lysosome; GO:0005773 vacuole; GO:0005777 peroxis…	GO:0003824 catalytic activity; GO:0004784 superoxide dismutase activity; GO:0004842 ubiquitin-protein transferase activity; GO:0005488 binding; GO:0005507 copper ion binding; GO:0005515 protein binding; GO:0008270 zinc ion binding; GO:0016209 antioxidant activity; GO:0016491 oxidoreductase activity; GO:0016721 oxidoreductase activity, acting on superoxide radicals as acceptor; GO:0016740 transfer…	PF00080	Copper/zinc superoxide dismutase (SODC)	P	KOG0441	Cu2+/Zn2+ superoxide dismutase SOD1
P48059	LIM and senescent cell antigen-like-containing domain protein 1 OS=Homo sapiens OX=9606 GN=LIMS1 PE=1 SV=4	LIMS1	0.4815	0.000131873	Down	37.251	19.4	5	5	0.605486	0.650193	0.69425	1.39593	1.26665	1.38749	nucleus	K23354			GO:0001952 regulation of cell-matrix adhesion; GO:0001954 positive regulation of cell-matrix adhesion; GO:0006355 regulation of transcription, DNA-templated; GO:0007154 cell communication; GO:0007155 cell adhesion; GO:0007160 cell-matrix adhesion; GO:0007163 establishment or maintenance of cell polarity; GO:0007165 signal transduction; GO:0007166 cell surface receptor signaling pathway; GO:000727…	GO:0005622 intracellular; GO:0005623 cell; GO:0005737 cytoplasm; GO:0005829 cytosol; GO:0005886 plasma membrane; GO:0005911 cell-cell junction; GO:0005912 adherens junction; GO:0005925 focal adhesion; GO:0016020 membrane; GO:0030054 cell junction; GO:0030055 cell-substrate junction; GO:0032991 protein-containing complex; GO:0048471 perinuclear region of cytoplasm; GO:0070161 anchoring junction; G…	GO:0005488 binding; GO:0005515 protein binding; GO:0008270 zinc ion binding; GO:0019899 enzyme binding; GO:0019900 kinase binding; GO:0019901 protein kinase binding; GO:0043167 ion binding; GO:0043169 cation binding; GO:0046872 metal ion binding; GO:0046914 transition metal ion binding;	PF00412	LIM domain	TZ	KOG2272	Focal adhesion protein PINCH-1, contains LIM domains
O95831	Apoptosis-inducing factor 1, mitochondrial OS=Homo sapiens OX=9606 GN=AIFM1 PE=1 SV=1	AIFM1	0.4817	4.32905e-08	Down	66.9	45.8	21	21	0.6442	0.655901	0.650438	1.35996	1.34953	1.33997	mitochondria	K04727	AIFM1; apoptosis-inducing factor 1 [EC:1.-.-.-]	hsa04210 Apoptosis; hsa04217 Necroptosis	GO:0000302 response to reactive oxygen species; GO:0001101 response to acid chemical; GO:0002931 response to ischemia; GO:0006091 generation of precursor metabolites and energy; GO:0006323 DNA packaging; GO:0006915 apoptotic process; GO:0006919 activation of cysteine-type endopeptidase activity involved in apoptotic process; GO:0006950 response to stress; GO:0006979 response to oxidative stress; …	GO:0005622 intracellular; GO:0005623 cell; GO:0005634 nucleus; GO:0005737 cytoplasm; GO:0005739 mitochondrion; GO:0005740 mitochondrial envelope; GO:0005741 mitochondrial outer membrane; GO:0005743 mitochondrial inner membrane; GO:0005758 mitochondrial intermembrane space; GO:0005829 cytosol; GO:0016020 membrane; GO:0019866 organelle inner membrane; GO:0019867 outer membrane; GO:0031090 organelle…	GO:0000166 nucleotide binding; GO:0003676 nucleic acid binding; GO:0003677 DNA binding; GO:0003824 catalytic activity; GO:0004174 electron-transferring-flavoprotein dehydrogenase activity; GO:0005488 binding; GO:0009055 electron transfer activity; GO:0016174 NAD(P)H oxidase (H(2)O(2)-forming activity; GO:0016491 oxidoreductase activity; GO:0016645 oxidoreductase activity, acting on the CH-NH grou…	PF07992	Pyridine nucleotide-disulphide oxidoreductase	C	KOG1346	Programmed cell death 8 (apoptosis-inducing factor)
P17931	Galectin-3 OS=Homo sapiens OX=9606 GN=LGALS3 PE=1 SV=5	LGALS3	0.4819	3.49288e-06	Down	26.152	26	6	6	0.658397	0.646876	0.645994	1.3174	1.40142	1.32991	cytoplasm,nucleus	K06831			GO:0001501 skeletal system development; GO:0001775 cell activation; GO:0001906 cell killing; GO:0002252 immune effector process; GO:0002263 cell activation involved in immune response; GO:0002274 myeloid leukocyte activation; GO:0002275 myeloid cell activation involved in immune response; GO:0002283 neutrophil activation involved in immune response; GO:0002366 leukocyte activation involved in imm…	GO:0001772 immunological synapse; GO:0005576 extracellular region; GO:0005615 extracellular space; GO:0005622 intracellular; GO:0005623 cell; GO:0005634 nucleus; GO:0005737 cytoplasm; GO:0005739 mitochondrion; GO:0005740 mitochondrial envelope; GO:0005743 mitochondrial inner membrane; GO:0005886 plasma membrane; GO:0009897 external side of plasma membrane; GO:0009986 cell surface; GO:0012505 endo…	GO:0005102 signaling receptor binding; GO:0005488 binding; GO:0005515 protein binding; GO:0019863 IgE binding; GO:0019865 immunoglobulin binding; GO:0030246 carbohydrate binding; GO:0030545 receptor regulator activity; GO:0034987 immunoglobulin receptor binding; GO:0034988 Fc-gamma receptor I complex binding; GO:0036094 small molecule binding; GO:0038023 signaling receptor activity; GO:0042056 ch…	PF00337	Galactoside-binding lectin	W	KOG3587	Galectin, galactose-binding lectin
Q8WUN7	Ubiquitin domain-containing protein 2 OS=Homo sapiens OX=9606 GN=UBTD2 PE=1 SV=2	UBTD2	0.4821	2.34608e-06	Down	26.189	32.5	6	6	0.649942	0.653081	0.648618	1.39538	1.34167	1.31131	mitochondria							PF00240	Ubiquitin family	S	KOG0013	Uncharacterized conserved protein
Q9NPH0	Lysophosphatidic acid phosphatase type 6 OS=Homo sapiens OX=9606 GN=ACP6 PE=1 SV=3	ACP6	0.4824	0.00180455	Down	48.886	17.5	7	7	0.74259	0.597187	0.612759	1.43093	1.16496	1.45158	mitochondria	K14395			GO:0002244 hematopoietic progenitor cell differentiation; GO:0002376 immune system process; GO:0002520 immune system development; GO:0006629 lipid metabolic process; GO:0006644 phospholipid metabolic process; GO:0006650 glycerophospholipid metabolic process; GO:0006654 phosphatidic acid biosynthetic process; GO:0006793 phosphorus metabolic process; GO:0006796 phosphate-containing compound metabol…	GO:0005622 intracellular; GO:0005623 cell; GO:0005737 cytoplasm; GO:0005739 mitochondrion; GO:0005759 mitochondrial matrix; GO:0031974 membrane-enclosed lumen; GO:0043226 organelle; GO:0043227 membrane-bounded organelle; GO:0043229 intracellular organelle; GO:0043231 intracellular membrane-bounded organelle; GO:0043233 organelle lumen; GO:0070013 intracellular organelle lumen;	GO:0003824 catalytic activity; GO:0016787 hydrolase activity; GO:0016788 hydrolase activity, acting on ester bonds; GO:0016791 phosphatase activity; GO:0042578 phosphoric ester hydrolase activity; GO:0052642 lysophosphatidic acid phosphatase activity;			I	KOG3720	Lysosomal & prostatic acid phosphatases
Q8NHU2	Cilia- and flagella-associated protein 61 OS=Homo sapiens OX=9606 GN=CFAP61 PE=2 SV=3	CFAP61	0.4826	8.09627e-06	Down	141.35	22.7	23	23	0.653464	0.661557	0.638135	1.35409	1.29417	1.39858	nucleus				GO:0003341 cilium movement; GO:0006928 movement of cell or subcellular component; GO:0006996 organelle organization; GO:0007017 microtubule-based process; GO:0007018 microtubule-based movement; GO:0009987 cellular process; GO:0016043 cellular component organization; GO:0030030 cell projection organization; GO:0044782 cilium organization; GO:0071840 cellular component organization or biogenesis; G…	GO:0005622 intracellular; GO:0005623 cell; GO:0005737 cytoplasm; GO:0005856 cytoskeleton; GO:0005929 cilium; GO:0005930 axoneme; GO:0031514 motile cilium; GO:0032838 plasma membrane bounded cell projection cytoplasm; GO:0042995 cell projection; GO:0043226 organelle; GO:0043228 non-membrane-bounded organelle; GO:0043229 intracellular organelle; GO:0043232 intracellular non-membrane-bounded organel…
Q6ZTR5	Cilia- and flagella-associated protein 47 OS=Homo sapiens OX=9606 GN=CFAP47 PE=2 SV=5	CFAP47	0.4835	8.83693e-07	Down	361.62	25.4	68	68	0.651845	0.637641	0.666098	1.36155	1.3312	1.35166	mitochondria
O75439	Mitochondrial-processing peptidase subunit beta OS=Homo sapiens OX=9606 GN=PMPCB PE=1 SV=2	PMPCB	0.4837	1.31779e-06	Down	54.366	22.3	10	10	0.656112	0.646167	0.653756	1.38744	1.31938	1.33714	mitochondria	K17732			GO:0006091 generation of precursor metabolites and energy; GO:0006119 oxidative phosphorylation; GO:0006122 mitochondrial electron transport, ubiquinol to cytochrome c; GO:0006139 nucleobase-containing compound metabolic process; GO:0006163 purine nucleotide metabolic process; GO:0006508 proteolysis; GO:0006605 protein targeting; GO:0006626 protein targeting to mitochondrion; GO:0006627 protein p…	GO:0005622 intracellular; GO:0005623 cell; GO:0005737 cytoplasm; GO:0005739 mitochondrion; GO:0005740 mitochondrial envelope; GO:0005743 mitochondrial inner membrane; GO:0005746 mitochondrial respirasome; GO:0005750 mitochondrial respiratory chain complex III; GO:0005759 mitochondrial matrix; GO:0016020 membrane; GO:0019866 organelle inner membrane; GO:0031090 organelle membrane; GO:0031966 mitoc…	GO:0003824 catalytic activity; GO:0004175 endopeptidase activity; GO:0004222 metalloendopeptidase activity; GO:0005488 binding; GO:0008233 peptidase activity; GO:0008237 metallopeptidase activity; GO:0008270 zinc ion binding; GO:0016787 hydrolase activity; GO:0043167 ion binding; GO:0043169 cation binding; GO:0046872 metal ion binding; GO:0046914 transition metal ion binding; GO:0070011 peptidase…	PF05193	Peptidase M16 inactive domain	C	KOG0960	Mitochondrial processing peptidase, beta subunit, and related enzymes (insulinase superfamily)
Q6ZN84	Coiled-coil domain-containing protein 81 OS=Homo sapiens OX=9606 GN=CCDC81 PE=1 SV=2	CCDC81	0.4837	0.000336364	Down	76.083	18.6	11	11	0.649593	0.697825	0.608762	1.34719	1.23222	1.4644	cytoplasm					GO:0005622 intracellular; GO:0005623 cell; GO:0005813 centrosome; GO:0005815 microtubule organizing center; GO:0005856 cytoskeleton; GO:0015630 microtubule cytoskeleton; GO:0043226 organelle; GO:0043228 non-membrane-bounded organelle; GO:0043229 intracellular organelle; GO:0043232 intracellular non-membrane-bounded organelle;
Q9UNZ2	NSFL1 cofactor p47 OS=Homo sapiens OX=9606 GN=NSFL1C PE=1 SV=2	NSFL1C	0.486	2.33989e-06	Down	40.572	39.7	11	11	0.664012	0.638322	0.659893	1.34752	1.31428	1.37598	nucleus	K14012	NSFL1C; UBX domain-containing protein 1	hsa04141 Protein processing in endoplasmic reticulum	GO:0000045 autophagosome assembly; GO:0000132 establishment of mitotic spindle orientation; GO:0000226 microtubule cytoskeleton organization; GO:0000278 mitotic cell cycle; GO:0006508 proteolysis; GO:0006511 ubiquitin-dependent protein catabolic process; GO:0006807 nitrogen compound metabolic process; GO:0006914 autophagy; GO:0006996 organelle organization; GO:0006997 nucleus organization; GO:000…	GO:0000922 spindle pole; GO:0005622 intracellular; GO:0005623 cell; GO:0005634 nucleus; GO:0005654 nucleoplasm; GO:0005737 cytoplasm; GO:0005813 centrosome; GO:0005815 microtubule organizing center; GO:0005819 spindle; GO:0005829 cytosol; GO:0005856 cytoskeleton; GO:0005886 plasma membrane; GO:0015630 microtubule cytoskeleton; GO:0016020 membrane; GO:0031616 spindle pole centrosome; GO:0031974 me…	GO:0005488 binding; GO:0005515 protein binding; GO:0019208 phosphatase regulator activity; GO:0019888 protein phosphatase regulator activity; GO:0019899 enzyme binding; GO:0030234 enzyme regulator activity; GO:0032182 ubiquitin-like protein binding; GO:0043130 ubiquitin binding; GO:0051117 ATPase binding; GO:0098772 molecular function regulator;	PF08059; PF00789	SEP domain; UBX domain	Y	KOG2086	Protein tyrosine phosphatase SHP1/Cofactor for p97 ATPase-mediated vesicle membrane fusion
Q9H1X1	Radial spoke head protein 9 homolog OS=Homo sapiens OX=9606 GN=RSPH9 PE=1 SV=1	RSPH9	0.4861	6.14436e-05	Down	31.291	47.1	10	10	0.707251	0.630265	0.625169	1.32447	1.34157	1.37127	nucleus	K19757			GO:0000226 microtubule cytoskeleton organization; GO:0001539 cilium or flagellum-dependent cell motility; GO:0001578 microtubule bundle formation; GO:0003341 cilium movement; GO:0006928 movement of cell or subcellular component; GO:0006996 organelle organization; GO:0007010 cytoskeleton organization; GO:0007017 microtubule-based process; GO:0007018 microtubule-based movement; GO:0009987 cellular …	GO:0005622 intracellular; GO:0005623 cell; GO:0005737 cytoplasm; GO:0005856 cytoskeleton; GO:0005929 cilium; GO:0005930 axoneme; GO:0031514 motile cilium; GO:0032838 plasma membrane bounded cell projection cytoplasm; GO:0042995 cell projection; GO:0043226 organelle; GO:0043228 non-membrane-bounded organelle; GO:0043229 intracellular organelle; GO:0043232 intracellular non-membrane-bounded organel…
P15121	Aldo-keto reductase family 1 member B1 OS=Homo sapiens OX=9606 GN=AKR1B1 PE=1 SV=3	AKR1B1	0.4865	1.5908e-07	Down	35.853	59.8	21	21	0.663622	0.643998	0.655975	1.35173	1.34625	1.33843	cytoplasm	K00011	AKR1B; aldehyde reductase [EC:1.1.1.21]	hsa00052 Galactose metabolism; hsa00790 Folate biosynthesis; hsa00051 Fructose and mannose metabolism; hsa00561 Glycerolipid metabolism; hsa00040 Pentose and glucuronate interconversions; hsa01100 Metabolic pathways	GO:0000003 reproduction; GO:0000302 response to reactive oxygen species; GO:0001101 response to acid chemical; GO:0001655 urogenital system development; GO:0001822 kidney development; GO:0001894 tissue homeostasis; GO:0003008 system process; GO:0003014 renal system process; GO:0003091 renal water homeostasis; GO:0005975 carbohydrate metabolic process; GO:0005996 monosaccharide metabolic process; …	GO:0000323 lytic vacuole; GO:0005576 extracellular region; GO:0005615 extracellular space; GO:0005622 intracellular; GO:0005623 cell; GO:0005634 nucleus; GO:0005654 nucleoplasm; GO:0005737 cytoplasm; GO:0005764 lysosome; GO:0005773 vacuole; GO:0005829 cytosol; GO:0005902 microvillus; GO:0005911 cell-cell junction; GO:0030054 cell junction; GO:0031974 membrane-enclosed lumen; GO:0031981 nuclear lu…	GO:0003824 catalytic activity; GO:0004032 alditol:NADP+ 1-oxidoreductase activity; GO:0004033 aldo-keto reductase (NADP) activity; GO:0008106 alcohol dehydrogenase (NADP+) activity; GO:0009055 electron transfer activity; GO:0016491 oxidoreductase activity; GO:0016614 oxidoreductase activity, acting on CH-OH group of donors; GO:0016616 oxidoreductase activity, acting on the CH-OH group of donors, …	PF00248	Aldo/keto reductase family	S	KOG1577	Aldo/keto reductase family proteins
P23434	Glycine cleavage system H protein, mitochondrial OS=Homo sapiens OX=9606 GN=GCSH PE=1 SV=2	GCSH	0.487	9.35498e-05	Down	18.884	17.3	2	2	0.694398	0.603217	0.66744	1.38858	1.3414	1.30497	mitochondria	K02437	gcvH; glycine cleavage system H protein	hsa00260 Glycine, serine and threonine metabolism; hsa01200 Carbon metabolism; hsa00630 Glyoxylate and dicarboxylate metabolism; hsa01100 Metabolic pathways	GO:0001505 regulation of neurotransmitter levels; GO:0006082 organic acid metabolic process; GO:0006464 cellular protein modification process; GO:0006520 cellular amino acid metabolic process; GO:0006544 glycine metabolic process; GO:0006546 glycine catabolic process; GO:0006807 nitrogen compound metabolic process; GO:0008152 metabolic process; GO:0009056 catabolic process; GO:0009063 cellular am…	GO:0005622 intracellular; GO:0005623 cell; GO:0005737 cytoplasm; GO:0005739 mitochondrion; GO:0005759 mitochondrial matrix; GO:0005960 glycine cleavage complex; GO:0031974 membrane-enclosed lumen; GO:0032991 protein-containing complex; GO:0043226 organelle; GO:0043227 membrane-bounded organelle; GO:0043229 intracellular organelle; GO:0043231 intracellular membrane-bounded organelle; GO:0043233 or…	GO:0003824 catalytic activity; GO:0004047 aminomethyltransferase activity; GO:0008168 methyltransferase activity; GO:0016740 transferase activity; GO:0016741 transferase activity, transferring one-carbon groups;	PF01597	Glycine cleavage H-protein	E	KOG3373	Glycine cleavage system H protein (lipoate-binding)
Q13636	Ras-related protein Rab-31 OS=Homo sapiens OX=9606 GN=RAB31 PE=1 SV=1	RAB31	0.488	0.00285969	Down	21.569	18	3	3	0.642472	0.779207	0.545947	1.24851	1.33553	1.44833	cytoplasm	K07891	RAB22; Ras-related protein Rab-22	hsa04144 Endocytosis	GO:0001775 cell activation; GO:0002252 immune effector process; GO:0002263 cell activation involved in immune response; GO:0002274 myeloid leukocyte activation; GO:0002275 myeloid cell activation involved in immune response; GO:0002283 neutrophil activation involved in immune response; GO:0002366 leukocyte activation involved in immune response; GO:0002376 immune system process; GO:0002443 leukoc…	GO:0000139 Golgi membrane; GO:0005622 intracellular; GO:0005623 cell; GO:0005737 cytoplasm; GO:0005768 endosome; GO:0005769 early endosome; GO:0005794 Golgi apparatus; GO:0005802 trans-Golgi network; GO:0005829 cytosol; GO:0005886 plasma membrane; GO:0010008 endosome membrane; GO:0012505 endomembrane system; GO:0012506 vesicle membrane; GO:0016020 membrane; GO:0030139 endocytic vesicle; GO:003014…	GO:0000166 nucleotide binding; GO:0001882 nucleoside binding; GO:0001883 purine nucleoside binding; GO:0003824 catalytic activity; GO:0003924 GTPase activity; GO:0005488 binding; GO:0005525 GTP binding; GO:0016462 pyrophosphatase activity; GO:0016787 hydrolase activity; GO:0016817 hydrolase activity, acting on acid anhydrides; GO:0016818 hydrolase activity, acting on acid anhydrides, in phosphoru…	PF00071	Ras family	U	KOG0092	GTPase Rab5/YPT51 and related small G protein superfamily GTPases
Q8IVN8	Somatomedin-B and thrombospondin type-1 domain-containing protein OS=Homo sapiens OX=9606 GN=SBSPON PE=1 SV=2	SBSPON	0.4881	0.000438614	Down	29.61	8.7	2	2	0.703893	0.680494	0.583753	1.3795	1.25185	1.4005	extracellular							PF00090	Thrombospondin type 1 domain
Q1ZYL8	Izumo sperm-egg fusion protein 4 OS=Homo sapiens OX=9606 GN=IZUMO4 PE=2 SV=2	IZUMO4	0.4907	1.72203e-05	Down	26.51	35.8	7	7	0.677343	0.646133	0.651688	1.27686	1.35619	1.39179	extracellular					GO:0005622 intracellular; GO:0005623 cell; GO:0005634 nucleus; GO:0043226 organelle; GO:0043227 membrane-bounded organelle; GO:0043229 intracellular organelle; GO:0043231 intracellular membrane-bounded organelle;
Q6PIU2	Neutral cholesterol ester hydrolase 1 OS=Homo sapiens OX=9606 GN=NCEH1 PE=1 SV=3	NCEH1	0.4912	0.000218399	Down	45.807	8.3	3	3	0.599208	0.69077	0.68647	1.26534	1.34987	1.40833	extracellular	K14349	NCEH1; neutral cholesterol ester hydrolase 1 [EC:3.1.1.-]	hsa04979 Cholesterol metabolism; hsa04927 Cortisol synthesis and secretion; hsa04976 Bile secretion; hsa04934 Cushing syndrome	GO:0006464 cellular protein modification process; GO:0006470 protein dephosphorylation; GO:0006793 phosphorus metabolic process; GO:0006796 phosphate-containing compound metabolic process; GO:0006805 xenobiotic metabolic process; GO:0006807 nitrogen compound metabolic process; GO:0007154 cell communication; GO:0007165 signal transduction; GO:0007166 cell surface receptor signaling pathway; GO:000…	GO:0005622 intracellular; GO:0005623 cell; GO:0005737 cytoplasm; GO:0005783 endoplasmic reticulum; GO:0005789 endoplasmic reticulum membrane; GO:0012505 endomembrane system; GO:0016020 membrane; GO:0031984 organelle subcompartment; GO:0042175 nuclear outer membrane-endoplasmic reticulum membrane network; GO:0043226 organelle; GO:0043227 membrane-bounded organelle; GO:0043229 intracellular organel…	GO:0003824 catalytic activity; GO:0004771 sterol esterase activity; GO:0005488 binding; GO:0016298 lipase activity; GO:0016787 hydrolase activity; GO:0016788 hydrolase activity, acting on ester bonds; GO:0017171 serine hydrolase activity; GO:0042301 phosphate ion binding; GO:0043167 ion binding; GO:0043168 anion binding; GO:0052689 carboxylic ester hydrolase activity;	PF07859	alpha/beta hydrolase fold	V	KOG1515	Arylacetamide deacetylase
Q9H0C1	Zinc finger MYND domain-containing protein 12 OS=Homo sapiens OX=9606 GN=ZMYND12 PE=1 SV=3	ZMYND12	0.492	8.92974e-06	Down	41.817	38.9	11	11	0.629414	0.664579	0.684466	1.3491	1.33156	1.34088	cytoplasm					GO:0005622 intracellular; GO:0005623 cell;		PF01753	MYND finger
Q9P2M1	LRP2-binding protein OS=Homo sapiens OX=9606 GN=LRP2BP PE=1 SV=2	LRP2BP	0.4922	5.46578e-05	Down	39.78	23.9	7	7	0.637033	0.684535	0.657579	1.28539	1.42954	1.30593	cytoplasm					GO:0005622 intracellular; GO:0005623 cell; GO:0005737 cytoplasm;				MOT	KOG1550	Extracellular protein SEL-1 and related proteins
O95479	GDH/6PGL endoplasmic bifunctional protein OS=Homo sapiens OX=9606 GN=H6PD PE=1 SV=2	H6PD	0.4931	6.18169e-06	Down	88.892	20.9	13	13	0.67487	0.634878	0.671709	1.31529	1.36684	1.33642	extracellular	K13937	H6PD; hexose-6-phosphate dehydrogenase [EC:1.1.1.47 3.1.1.31]	hsa01200 Carbon metabolism; hsa00030 Pentose phosphate pathway; hsa01100 Metabolic pathways	GO:0005975 carbohydrate metabolic process; GO:0006081 cellular aldehyde metabolic process; GO:0006098 pentose-phosphate shunt; GO:0006139 nucleobase-containing compound metabolic process; GO:0006725 cellular aromatic compound metabolic process; GO:0006732 coenzyme metabolic process; GO:0006733 oxidoreduction coenzyme metabolic process; GO:0006739 NADP metabolic process; GO:0006753 nucleoside phos…	GO:0005622 intracellular; GO:0005623 cell; GO:0005737 cytoplasm; GO:0005739 mitochondrion; GO:0005783 endoplasmic reticulum; GO:0005788 endoplasmic reticulum lumen; GO:0012505 endomembrane system; GO:0031974 membrane-enclosed lumen; GO:0043226 organelle; GO:0043227 membrane-bounded organelle; GO:0043229 intracellular organelle; GO:0043231 intracellular membrane-bounded organelle; GO:0043233 organ…	GO:0000166 nucleotide binding; GO:0003824 catalytic activity; GO:0004345 glucose-6-phosphate dehydrogenase activity; GO:0005488 binding; GO:0016491 oxidoreductase activity; GO:0016614 oxidoreductase activity, acting on CH-OH group of donors; GO:0016616 oxidoreductase activity, acting on the CH-OH group of donors, NAD or NADP as acceptor; GO:0016787 hydrolase activity; GO:0016788 hydrolase activit…	PF00479; PF02781; PF01182	Glucose-6-phosphate dehydrogenase, NAD binding domain; Glucose-6-phosphate dehydrogenase, C-terminal domain; Glucosamine-6-phosphate isomerases/6-phosphogluconolactonase	G	KOG3147	6-phosphogluconolactonase - like protein
Q99766	ATP synthase subunit s, mitochondrial OS=Homo sapiens OX=9606 GN=DMAC2L PE=1 SV=3	DMAC2L	0.4931	1.08076e-05	Down	24.866	41.4	7	7	0.689763	0.644977	0.646812	1.37462	1.31074	1.33309	extracellular	K07554			GO:0006139 nucleobase-containing compound metabolic process; GO:0006163 purine nucleotide metabolic process; GO:0006164 purine nucleotide biosynthetic process; GO:0006725 cellular aromatic compound metabolic process; GO:0006753 nucleoside phosphate metabolic process; GO:0006754 ATP biosynthetic process; GO:0006793 phosphorus metabolic process; GO:0006796 phosphate-containing compound metabolic pr…	GO:0005622 intracellular; GO:0005623 cell; GO:0005737 cytoplasm; GO:0005739 mitochondrion; GO:0005740 mitochondrial envelope; GO:0005743 mitochondrial inner membrane; GO:0016020 membrane; GO:0019866 organelle inner membrane; GO:0031090 organelle membrane; GO:0031966 mitochondrial membrane; GO:0031967 organelle envelope; GO:0031975 envelope; GO:0043226 organelle; GO:0043227 membrane-bounded organe…	GO:0005215 transporter activity; GO:0008324 cation transmembrane transporter activity; GO:0015075 ion transmembrane transporter activity; GO:0015077 monovalent inorganic cation transmembrane transporter activity; GO:0015078 proton transmembrane transporter activity; GO:0015318 inorganic molecular entity transmembrane transporter activity; GO:0022857 transmembrane transporter activity; GO:0022890 …			C	KOG3864	Uncharacterized conserved protein
Q16181	Septin-7 OS=Homo sapiens OX=9606 GN=SEPTIN7 PE=1 SV=2	SEPTIN7	0.4938	1.81603e-06	Down	50.679	35.5	12	11	0.667892	0.671569	0.643808	1.33288	1.36447	1.31938	cytoplasm	K16944	SEPT7; septin 7	hsa05131 Shigellosis	GO:0000278 mitotic cell cycle; GO:0000281 mitotic cytokinesis; GO:0000902 cell morphogenesis; GO:0000904 cell morphogenesis involved in differentiation; GO:0000910 cytokinesis; GO:0006996 organelle organization; GO:0007010 cytoskeleton organization; GO:0007049 cell cycle; GO:0007275 multicellular organism development; GO:0007399 nervous system development; GO:0007409 axonogenesis; GO:0008360 regu…	GO:0001725 stress fiber; GO:0005622 intracellular; GO:0005623 cell; GO:0005634 nucleus; GO:0005737 cytoplasm; GO:0005856 cytoskeleton; GO:0005929 cilium; GO:0005930 axoneme; GO:0005938 cell cortex; GO:0005940 septin ring; GO:0015629 actin cytoskeleton; GO:0016020 membrane; GO:0030424 axon; GO:0031105 septin complex; GO:0031514 motile cilium; GO:0032156 septin cytoskeleton; GO:0032160 septin filam…	GO:0005488 binding; GO:0005515 protein binding; GO:0042802 identical protein binding; GO:0046982 protein heterodimerization activity; GO:0046983 protein dimerization activity;	PF00735	Septin	DUZ	KOG2655	Septin family protein (P-loop GTPase)
P53597	Succinate--CoA ligase [ADP/GDP-forming] subunit alpha, mitochondrial OS=Homo sapiens OX=9606 GN=SUCLG1 PE=1 SV=4	SUCLG1	0.494	7.68863e-06	Down	36.249	35.5	9	9	0.658931	0.635242	0.68963	1.33631	1.33789	1.34199	mitochondria	K01899	LSC1; succinyl-CoA synthetase alpha subunit [EC:6.2.1.4 6.2.1.5]	hsa00640 Propanoate metabolism; hsa01200 Carbon metabolism; hsa00020 Citrate cycle (TCA cycle); hsa01100 Metabolic pathways	GO:0006082 organic acid metabolic process; GO:0006091 generation of precursor metabolites and energy; GO:0006099 tricarboxylic acid cycle; GO:0006101 citrate metabolic process; GO:0006104 succinyl-CoA metabolic process; GO:0006105 succinate metabolic process; GO:0006139 nucleobase-containing compound metabolic process; GO:0006163 purine nucleotide metabolic process; GO:0006637 acyl-CoA metabolic …	GO:0005622 intracellular; GO:0005623 cell; GO:0005737 cytoplasm; GO:0005739 mitochondrion; GO:0005759 mitochondrial matrix; GO:0005829 cytosol; GO:0005886 plasma membrane; GO:0016020 membrane; GO:0030062 mitochondrial tricarboxylic acid cycle enzyme complex; GO:0031974 membrane-enclosed lumen; GO:0032991 protein-containing complex; GO:0042709 succinate-CoA ligase complex; GO:0043226 organelle; GO…	GO:0000166 nucleotide binding; GO:0001882 nucleoside binding; GO:0001883 purine nucleoside binding; GO:0003824 catalytic activity; GO:0004774 succinate-CoA ligase activity; GO:0004775 succinate-CoA ligase (ADP-forming) activity; GO:0004776 succinate-CoA ligase (GDP-forming) activity; GO:0005488 binding; GO:0005515 protein binding; GO:0016874 ligase activity; GO:0016877 ligase activity, forming ca…	PF02629; PF00549	CoA binding domain; CoA-ligase	C	KOG1255	Succinyl-CoA synthetase, alpha subunit
Q8WW35	Dynein light chain Tctex-type protein 2B OS=Homo sapiens OX=9606 GN=DYNLT2B PE=1 SV=2	DYNLT2B	0.4943	5.53934e-05	Down	16.122	31.7	4	4	0.686542	0.669011	0.629106	1.37226	1.38144	1.26164	cytoplasm	K22866			GO:0006996 organelle organization; GO:0009987 cellular process; GO:0016043 cellular component organization; GO:0022607 cellular component assembly; GO:0030030 cell projection organization; GO:0030031 cell projection assembly; GO:0031344 regulation of cell projection organization; GO:0032386 regulation of intracellular transport; GO:0032879 regulation of localization; GO:0032886 regulation of micr…	GO:0005622 intracellular; GO:0005623 cell; GO:0005856 cytoskeleton; GO:0005868 cytoplasmic dynein complex; GO:0005875 microtubule associated complex; GO:0015630 microtubule cytoskeleton; GO:0030286 dynein complex; GO:0032991 protein-containing complex; GO:0043226 organelle; GO:0043228 non-membrane-bounded organelle; GO:0043229 intracellular organelle; GO:0043232 intracellular non-membrane-bounded…	GO:0005488 binding; GO:0005515 protein binding; GO:0045505 dynein intermediate chain binding;			N	KOG4108	Dynein light chain
Q6UWB4	Serine protease 55 OS=Homo sapiens OX=9606 GN=PRSS55 PE=1 SV=2	PRSS55	0.4946	6.60788e-06	Down	38.856	26.1	7	7	0.646314	0.68043	0.658894	1.3314	1.30185	1.38111	extracellular					GO:0005622 intracellular; GO:0005623 cell; GO:0005737 cytoplasm; GO:0005829 cytosol;		PF00089	Trypsin	O	KOG3627	Trypsin
O43678	NADH dehydrogenase [ubiquinone] 1 alpha subcomplex subunit 2 OS=Homo sapiens OX=9606 GN=NDUFA2 PE=1 SV=3	NDUFA2	0.4947	0.00306341	Down	10.921	31.3	2	2	0.619402	0.561893	0.804469	1.41866	1.32114	1.27443	mitochondria	K03946	NDUFA2; NADH dehydrogenase (ubiquinone) 1 alpha subcomplex subunit 2	hsa04932 Non-alcoholic fatty liver disease; hsa05016 Huntington disease; hsa00190 Oxidative phosphorylation; hsa05012 Parkinson disease; hsa05010 Alzheimer disease; hsa04723 Retrograde endocannabinoid signaling; hsa04714 Thermogenesis; hsa05022 Pathways of neurodegeneration - multiple diseases; hsa05014 Amyotrophic lateral sclerosis; hsa05020 Prion disease; hsa01100 Metabolic pathways	GO:0006091 generation of precursor metabolites and energy; GO:0006119 oxidative phosphorylation; GO:0006120 mitochondrial electron transport, NADH to ubiquinone; GO:0006139 nucleobase-containing compound metabolic process; GO:0006163 purine nucleotide metabolic process; GO:0006725 cellular aromatic compound metabolic process; GO:0006753 nucleoside phosphate metabolic process; GO:0006793 phosphoru…	GO:0005622 intracellular; GO:0005623 cell; GO:0005737 cytoplasm; GO:0005739 mitochondrion; GO:0005740 mitochondrial envelope; GO:0005743 mitochondrial inner membrane; GO:0005746 mitochondrial respirasome; GO:0005747 mitochondrial respiratory chain complex I; GO:0016020 membrane; GO:0019866 organelle inner membrane; GO:0030964 NADH dehydrogenase complex; GO:0031090 organelle membrane; GO:0031966 m…	GO:0003824 catalytic activity; GO:0003954 NADH dehydrogenase activity; GO:0008137 NADH dehydrogenase (ubiquinone) activity; GO:0016491 oxidoreductase activity; GO:0016651 oxidoreductase activity, acting on NAD(P)H; GO:0016655 oxidoreductase activity, acting on NAD(P)H, quinone or similar compound as acceptor; GO:0050136 NADH dehydrogenase (quinone) activity;	PF05047	Mitochondrial ribosomal protein L51 / S25 / CI-B8 domain	C	KOG3446	NADH:ubiquinone oxidoreductase NDUFA2/B8 subunit
Q86VS3	IQ domain-containing protein H OS=Homo sapiens OX=9606 GN=IQCH PE=2 SV=2	IQCH	0.495	2.07007e-06	Down	117.35	4.2	3	3	0.653907	0.652711	0.680076	1.34513	1.35763	1.31055	cytoplasm
O75306	NADH dehydrogenase [ubiquinone] iron-sulfur protein 2, mitochondrial OS=Homo sapiens OX=9606 GN=NDUFS2 PE=1 SV=2	NDUFS2	0.4951	3.63009e-06	Down	52.545	48.2	16	16	0.682497	0.645547	0.658955	1.36344	1.31238	1.33719	mitochondria	K03935	NDUFS2; NADH dehydrogenase (ubiquinone) Fe-S protein 2 [EC:7.1.1.2]	hsa04932 Non-alcoholic fatty liver disease; hsa05016 Huntington disease; hsa00190 Oxidative phosphorylation; hsa05012 Parkinson disease; hsa05010 Alzheimer disease; hsa04723 Retrograde endocannabinoid signaling; hsa04714 Thermogenesis; hsa05022 Pathways of neurodegeneration - multiple diseases; hsa05014 Amyotrophic lateral sclerosis; hsa05020 Prion disease; hsa01100 Metabolic pathways	GO:0006091 generation of precursor metabolites and energy; GO:0006119 oxidative phosphorylation; GO:0006120 mitochondrial electron transport, NADH to ubiquinone; GO:0006139 nucleobase-containing compound metabolic process; GO:0006163 purine nucleotide metabolic process; GO:0006725 cellular aromatic compound metabolic process; GO:0006753 nucleoside phosphate metabolic process; GO:0006793 phosphoru…	GO:0005622 intracellular; GO:0005623 cell; GO:0005634 nucleus; GO:0005654 nucleoplasm; GO:0005737 cytoplasm; GO:0005739 mitochondrion; GO:0005740 mitochondrial envelope; GO:0005743 mitochondrial inner membrane; GO:0005746 mitochondrial respirasome; GO:0005747 mitochondrial respiratory chain complex I; GO:0005759 mitochondrial matrix; GO:0016020 membrane; GO:0019866 organelle inner membrane; GO:00…	GO:0003824 catalytic activity; GO:0003954 NADH dehydrogenase activity; GO:0005488 binding; GO:0005515 protein binding; GO:0008137 NADH dehydrogenase (ubiquinone) activity; GO:0009055 electron transfer activity; GO:0016491 oxidoreductase activity; GO:0016651 oxidoreductase activity, acting on NAD(P)H; GO:0016655 oxidoreductase activity, acting on NAD(P)H, quinone or similar compound as acceptor; G…			C	KOG2870	NADH:ubiquinone oxidoreductase, NDUFS2/49 kDa subunit
P17174	Aspartate aminotransferase, cytoplasmic OS=Homo sapiens OX=9606 GN=GOT1 PE=1 SV=3	GOT1	0.4955	1.91222e-06	Down	46.247	59.8	18	18	0.665182	0.653961	0.668709	1.33079	1.37573	1.30562	cytoplasm	K14454	GOT1; aspartate aminotransferase, cytoplasmic [EC:2.6.1.1]	hsa00270 Cysteine and methionine metabolism; hsa00250 Alanine, aspartate and glutamate metabolism; hsa00400 Phenylalanine, tyrosine and tryptophan biosynthesis; hsa00350 Tyrosine metabolism; hsa01210 2-Oxocarboxylic acid metabolism; hsa00360 Phenylalanine metabolism; hsa01200 Carbon metabolism; hsa00220 Arginine biosynthesis; hsa01230 Biosynthesis of amino acids; hsa01100 Metabolic pathways; hsa0…	GO:0003254 regulation of membrane depolarization; GO:0005975 carbohydrate metabolic process; GO:0005996 monosaccharide metabolic process; GO:0006006 glucose metabolic process; GO:0006066 alcohol metabolic process; GO:0006071 glycerol metabolic process; GO:0006082 organic acid metabolic process; GO:0006094 gluconeogenesis; GO:0006103 2-oxoglutarate metabolic process; GO:0006106 fumarate metabolic …	GO:0000323 lytic vacuole; GO:0005622 intracellular; GO:0005623 cell; GO:0005634 nucleus; GO:0005654 nucleoplasm; GO:0005737 cytoplasm; GO:0005764 lysosome; GO:0005773 vacuole; GO:0005829 cytosol; GO:0030424 axon; GO:0031974 membrane-enclosed lumen; GO:0031981 nuclear lumen; GO:0042995 cell projection; GO:0043005 neuron projection; GO:0043226 organelle; GO:0043227 membrane-bounded organelle; GO:00…	GO:0003824 catalytic activity; GO:0004069 L-aspartate:2-oxoglutarate aminotransferase activity; GO:0004609 phosphatidylserine decarboxylase activity; GO:0005488 binding; GO:0008483 transaminase activity; GO:0016740 transferase activity; GO:0016769 transferase activity, transferring nitrogenous groups; GO:0016829 lyase activity; GO:0016830 carbon-carbon lyase activity; GO:0016831 carboxy-lyase act…	PF00155	Aminotransferase class I and II	E	KOG1412	Aspartate aminotransferase/Glutamic oxaloacetic transaminase AAT2/GOT1
P61225	Ras-related protein Rap-2b OS=Homo sapiens OX=9606 GN=RAP2B PE=1 SV=1	RAP2B	0.4966	0.00704846	Down	20.504	21.3	3	2	0.531328	0.688566	0.770966	1.50029	1.12993	1.37892	cytoplasm	K07838			GO:0001775 cell activation; GO:0001932 regulation of protein phosphorylation; GO:0001934 positive regulation of protein phosphorylation; GO:0002252 immune effector process; GO:0002263 cell activation involved in immune response; GO:0002274 myeloid leukocyte activation; GO:0002275 myeloid cell activation involved in immune response; GO:0002283 neutrophil activation involved in immune response; GO:…	GO:0005576 extracellular region; GO:0005615 extracellular space; GO:0005622 intracellular; GO:0005623 cell; GO:0005737 cytoplasm; GO:0005768 endosome; GO:0005829 cytosol; GO:0005886 plasma membrane; GO:0005911 cell-cell junction; GO:0005923 bicellular tight junction; GO:0010008 endosome membrane; GO:0012505 endomembrane system; GO:0012506 vesicle membrane; GO:0016020 membrane; GO:0030054 cell jun…	GO:0000166 nucleotide binding; GO:0001882 nucleoside binding; GO:0001883 purine nucleoside binding; GO:0005488 binding; GO:0005515 protein binding; GO:0005525 GTP binding; GO:0017076 purine nucleotide binding; GO:0019001 guanyl nucleotide binding; GO:0019003 GDP binding; GO:0019904 protein domain specific binding; GO:0032549 ribonucleoside binding; GO:0032550 purine ribonucleoside binding; GO:003…	PF00071	Ras family	S	KOG0395	Ras-related GTPase
Q8N0X4	Citramalyl-CoA lyase, mitochondrial OS=Homo sapiens OX=9606 GN=CLYBL PE=1 SV=2	CLYBL	0.4968	2.97229e-05	Down	37.359	22.9	6	6	0.641072	0.691823	0.658591	1.39225	1.27907	1.33719	mitochondria	K11390			GO:0009987 cellular process; GO:0016043 cellular component organization; GO:0019222 regulation of metabolic process; GO:0022607 cellular component assembly; GO:0030656 regulation of vitamin metabolic process; GO:0031323 regulation of cellular metabolic process; GO:0043933 protein-containing complex subunit organization; GO:0044085 cellular component biogenesis; GO:0050789 regulation of biological…		GO:0000287 magnesium ion binding; GO:0003824 catalytic activity; GO:0004474 malate synthase activity; GO:0005488 binding; GO:0016740 transferase activity; GO:0016746 transferase activity, transferring acyl groups; GO:0016829 lyase activity; GO:0016830 carbon-carbon lyase activity; GO:0016833 oxo-acid-lyase activity; GO:0043167 ion binding; GO:0043169 cation binding; GO:0046872 metal ion binding; …
[truncated: 1,088 more rows]
