# Supplementary figures and images for: 4D-quantitative proteomics signature of asthenozoospermia and identification of extracellular matrix protein 1 as a novel biomarker for sperm motility
Source: Royal Society of Chemistry journal article supplement (doi:10.1039/d1mo00257k), 2021-11-24

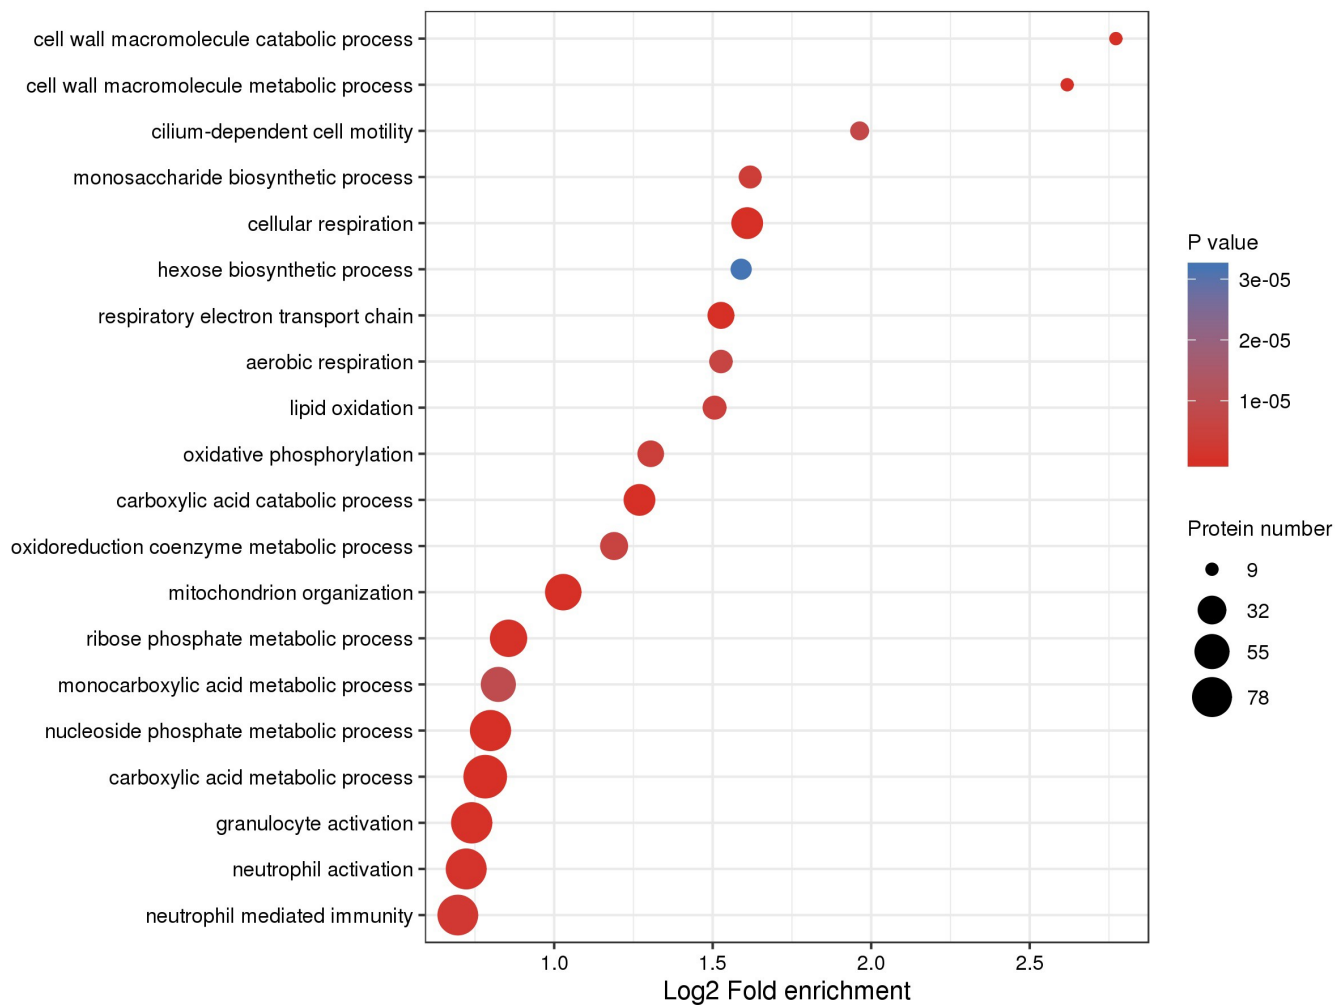

Supplement: d1mo00257k2.pdf [file d1mo00257k2.pdf]

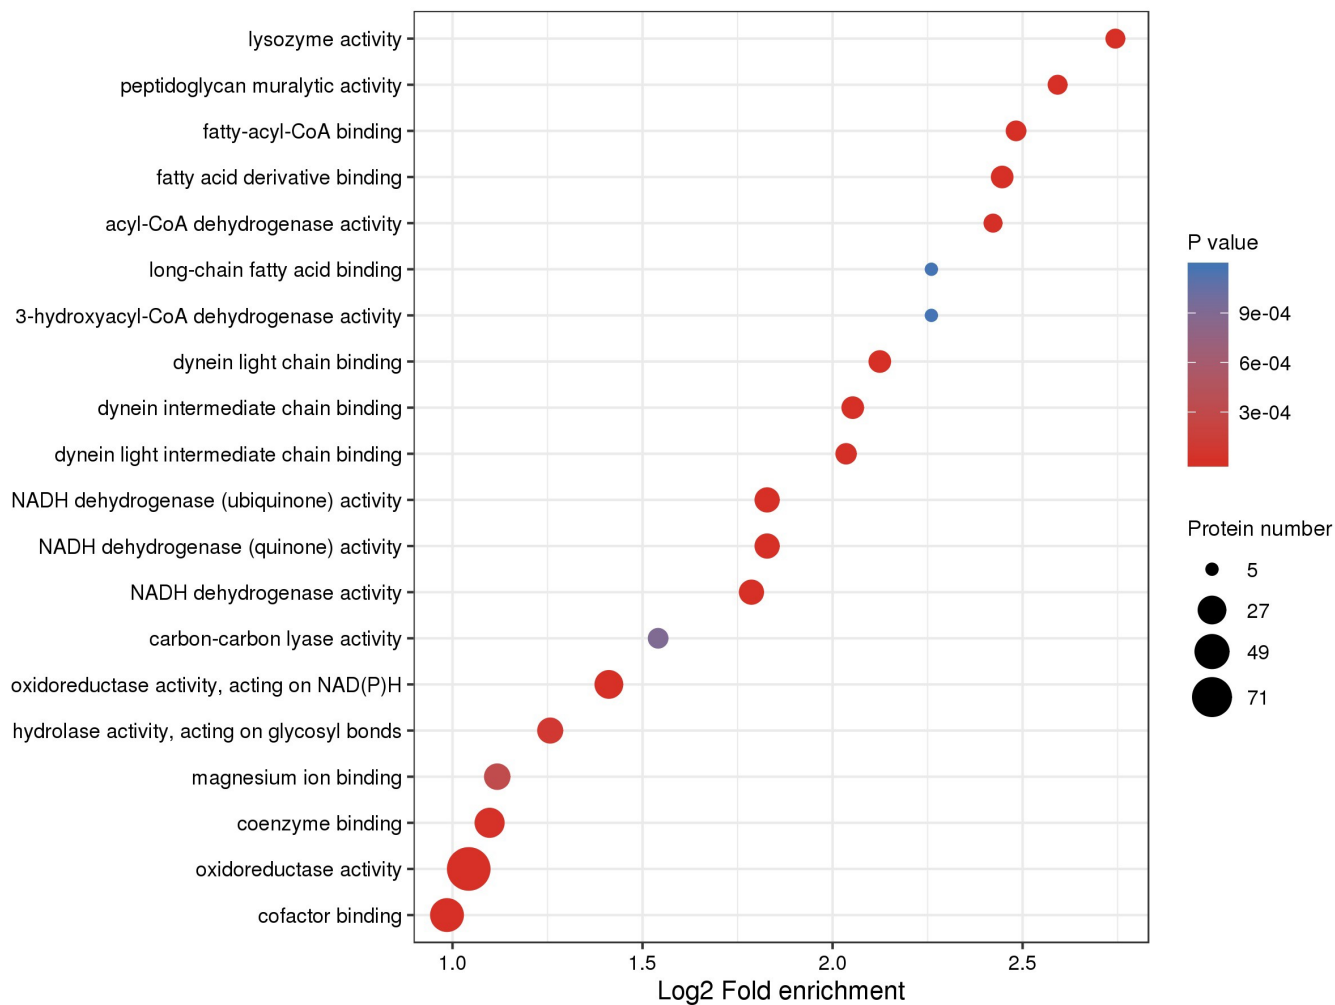

Supplement: d1mo00257k3.pdf [file d1mo00257k3.pdf]
